# Supplementary material
Source: publisher site journal article supplement (https://www.dovepress.com/article/486676)
Supplement: Supplementary file 1 [file get_supplementary_file.php]

**[Supplementary material](https://www.dovepress.com/get_supplementary_file.php?f=456326.docx" \t "https://www.ncbi.nlm.nih.gov/pmc/articles/PMC11178096/_blank)**

**Supplementary Table 1.** Circulating inflammatory protein number names

| ID | Reported trait | Symbol | Efo Traits | Discovery Sample Ancestry |
| --- | --- | --- | --- | --- |
| GCST90274758 | Eukaryotic translation initiation factor 4E-binding protein 1 levels | 4EBP1 | level of eukaryotic translation initiation factor 4E-binding protein 1 in blood plasma | 14736 European |
| GCST90274759 | Adenosine Deaminase levels | ADA | adenosine deaminase measurement | 14736 European |
| GCST90274760 | Artemin levels | ARTN | artemin measurement | 11778 European |
| GCST90274761 | Axin-1 levels | AXIN1 | axin-1 measurement | 11793 European |
| GCST90274762 | beta-nerve growth factor levels | Beta-NGF | beta-nerve growth factor measurement | 14743 European |
| GCST90274763 | Caspase 8 levels | CASP-8 | caspase-8 measurement | 14744 European |
| GCST90274764 | Eotaxin levels | CCL11 | eotaxin measurement | 14734 European |
| GCST90274765 | C-C motif chemokine 19 levels | CCL19 | C-C motif chemokine 19 measurement | 14736 European |
| GCST90274766 | C-C motif chemokine 20 levels | CCL20 | C-C motif chemokine 20 measurement | 14736 European |
| GCST90274767 | C-C motif chemokine 23 levels | CCL23 | C-C motif chemokine 23 measurement | 14736 European |
| GCST90274768 | C-C motif chemokine 25 levels | CCL25 | C-C motif chemokine 25 measurement | 14736 European |
| GCST90274769 | C-C motif chemokine 28 levels | CCL28 | C-C motif chemokine 28 measurement | 14734 European |
| GCST90274770 | C-C motif chemokine 4 levels | CCL4 | C-C motif chemokine 4-like measurement | 14744 European |
| GCST90274771 | Natural killer cell receptor 2B4 levels | CD244 | natural killer cell receptor 2B4 measurement | 14735 European |
| GCST90274772 | CD40L receptor levels | CD40 | CD40 measurement | 14736 European |
| GCST90274773 | T-cell surface glycoprotein CD5 levels | CD5 | t-cell surface glycoprotein CD5 measurement | 14735 European |
| GCST90274774 | T-cell surface glycoprotein CD6 isoform levels | CD6 | level of T-cell differentiation antigen CD6 in blood plasma | 14735 European |
| GCST90274775 | CUB domain-containing protein 1 levels | CDCP1 | CUB domain-containing protein 1 measurement | 14734 European |
| GCST90274776 | Macrophage colony-stimulating factor 1 levels | CSF-1 | macrophage colony-stimulating factor 1 measurement | 14734 European |
| GCST90274777 | Cystatin D levels | CST5 | cystatin-D measurement | 14736 European |
| GCST90274778 | Fractalkine levels | CX3CL1 | fractalkine measurement | 14743 European |
| GCST90274779 | C-X-C motif chemokine 1 levels | CXCL1 | CXCL1 measurement | 14736 European |
| GCST90274780 | C-X-C motif chemokine 10 levels | CXCL10 | C-X-C motif chemokine 10 measurement | 14744 European |
| GCST90274781 | C-X-C motif chemokine 11 levels | CXCL11 | C-X-C motif chemokine 11 measurement | 14736 European |
| GCST90274782 | C-X-C motif chemokine 5 levels | CXCL5 | C-X-C motif chemokine 5 measurement | 14736 European |
| GCST90274783 | C-X-C motif chemokine 6 levels | CXCL6 | C-X-C motif chemokine 6 measurement | 14744 European |
| GCST90274784 | C-X-C motif chemokine 9 levels | CXCL9 | C-X-C motif chemokine 9 measurement | 14735 European |
| GCST90274785 | Delta and Notch-like epidermal growth factor-related receptor levels | DNER | delta and Notch-like epidermal growth factor-related receptor measurement | 14735 European |
| GCST90274786 | Protein S100-A12 levels | EN-RAGE | protein S100-A12 measurement | 14743 European |
| GCST90274787 | Fibroblast growth factor 19 levels | FGF-19 | fibroblast growth factor 19 measurement | 14744 European |
| GCST90274788 | Fibroblast growth factor 21 levels | FGF-21 | fibroblast growth factor 21 measurement | 14743 European |
| GCST90274789 | Fibroblast growth factor 23 levels | FGF-23 | fibroblast growth factor 23 measurement | 14735 European |
| GCST90274790 | Fibroblast growth factor 5 levels | FGF-5 | fibroblast growth factor 5 measurement | 11789 European |
| GCST90274791 | Fms-related tyrosine kinase 3 ligand levels | FIt3L | obsolete_Fms-related tyrosine kinase 3 ligand measurement | 14734 European |
| GCST90274792 | Glial cell line-derived neurotrophic factor levels | hGDNF | glial cell line-derived neurotrophic factor measurement | 14736 European |
| GCST90274793 | Hepatocyte growth factor levels | HGF | hepatocyte growth factor measurement | 14734 European |
| GCST90274794 | Interferon gamma levels | IFN-gamma | interferon gamma measurement | 11793 European |
| GCST90274795 | Interleukin-10 levels | IL-10 | interleukin-10 measurement | 14744 European |
| GCST90274796 | Interleukin-10 receptor subunit alpha levels | IL-10RA | interleukin-10 receptor subunit alpha measurement | 11793 European |
| GCST90274797 | Interleukin-10 receptor subunit beta levels | IL-10RB | interleukin-10 receptor subunit beta measurement | 14734 European |
| GCST90274798 | Interleukin-12 subunit beta levels | IL-12B | obsolete_interleukin-12 subunit B measurement | 14735 European |
| GCST90274799 | Interleukin-13 levels | IL-13 | interleukin-13 measurement | 11792 European |
| GCST90274800 | Interleukin-15 receptor subunit alpha levels | IL-15RA | interleukin-15 receptor subunit alpha measurement | 11792 European |
| GCST90274801 | Interleukin-17A levels | IL-17A | interleukin-17A measurement | 11784 European |
| GCST90274802 | Interleukin-17C levels | IL-17C | interleukin-17C measurement | 11793 European |
| GCST90274803 | Interleukin-18 levels | IL-18 | interleukin 18 measurement | 14744 European |
| GCST90274804 | interleukin-18 receptor 1 levels | IL-18R1 | interleukin-18 receptor 1 measurement | 14743 European |
| GCST90274805 | Interleukin-1-alpha levels | IL-1 alpha | obsolete_interleukin-1 alpha measurement | 11788 European |
| GCST90274806 | Interleukin-2 levels | IL-2 | interleukin-2 measurement | 11789 European |
| GCST90274807 | Interleukin-20 levels | IL-20 | interleukin-20 measurement | 11784 European |
| GCST90274808 | Interleukin-20 receptor subunit alpha levels | IL-20RA | interleukin-20 receptor subunit alpha measurement | 11792 European |
| GCST90274809 | Interleukin-22 receptor subunit alpha-1 levels | IL-22RA1 | interleukin-22 receptor subunit alpha-1 measurement | 11793 European |
| GCST90274810 | Interleukin-24 levels | IL-24 | interleukin-24 measurement | 11785 European |
| GCST90274811 | Interleukin-2 receptor subunit beta levels | IL-2RB | interleukin-2 receptor subunit beta measurement | 11792 European |
| GCST90274812 | Interleukin-33 levels | IL-33 | level of interleukin-33 in blood plasma | 11793 European |
| GCST90274813 | Interleukin-4 levels | IL-4 | interleukin-4 measurement | 11793 European |
| GCST90274814 | Interleukin-5 levels | IL-5 | interleukin-5 measurement | 11792 European |
| GCST90274815 | Interleukin-6 levels | IL-6 | interleukin-6 measurement | 14743 European |
| GCST90274816 | Interleukin-7 levels | IL-7 | interleukin-7 measurement | 14736 European |
| GCST90274817 | Interleukin-8 levels | IL-8 | interleukin-8 measurement | 14744 European |
| GCST90274818 | Latency-associated peptide transforming growth factor beta 1 levels | LAP TGF-beta-1 | transforming growth factor beta-1 measurement | 14736 European |
| GCST90274819 | Leukemia inhibitory factor levels | LIF | leukemia inhibitory factor measurement | 11793 European |
| GCST90274820 | Leukemia inhibitory factor receptor levels | LIF-R | leukemia inhibitory factor receptor measurement | 11784 European |
| GCST90274821 | Monocyte chemoattractant protein-1 levels | CCL8 | CCL2 measurement | 14733 European |
| GCST90274822 | Monocyte chemoattractant protein 2 levels | CCL2 | monocyte chemotactic protein-2 measurement | 14736 European |
| GCST90274823 | Monocyte chemoattractant protein-3 levels | CCL7 | monocyte chemotactic protein 3 measurement | 11783 European |
| GCST90274824 | Monocyte chemoattractant protein-4 levels | CCL13 | monocyte chemotactic protein-4 measurement | 14736 European |
| GCST90274825 | Macrophage inflammatory protein 1a levels | MIP-1 alpha | macrophage inflammatory protein 1a measurement | 14743 European |
| GCST90274826 | Matrix metalloproteinase-1 levels | MMP-1 | matrix metalloproteinase 1 measurement | 14744 European |
| GCST90274827 | Matrix metalloproteinase-10 levels | MMP-10 | matrix metalloproteinase 10 measurement | 14744 European |
| GCST90274828 | Neurturin levels | NRTN | level of neurturin in blood plasma | 11791 European |
| GCST90274829 | Neurotrophin-3 levels | NT-3 | neurotrophin-3 measurement | 14744 European |
| GCST90274830 | Osteoprotegerin levels | OPG | osteoprotegerin measurement | 14733 European |
| GCST90274831 | Oncostatin-M levels | OSM | oncostatin-M measurement | 14736 European |
| GCST90274832 | Programmed cell death 1 ligand 1 levels | PD-L1 | programmed cell death 1 ligand 1 measurement | 14736 European |
| GCST90274833 | Stem cell factor levels | SCF | stem Cell Factor measurement | 14736 European |
| GCST90274834 | SIR2-like protein 2 levels | SIRT2 | SIR2-like protein 2 measurement | 14736 European |
| GCST90274835 | Signaling lymphocytic activation molecule levels | SLAMF1 | signaling lymphocytic activation molecule measurement | 14734 European |
| GCST90274836 | Sulfotransferase 1A1 levels | ST1A1 | sulfotrasferase 1A1 measurement | 11793 European |
| GCST90274837 | STAM binding protein levels | STAMPB | STAM binding protein measurement | 14736 European |
| GCST90274838 | Transforming growth factor-alpha levels | TGF-alpha | transforming growth factor-alpha measurement | 14733 European |
| GCST90274839 | Tumor necrosis factor levels | TWEAK | tumor necrosis factor measurement | 11785 European |
| GCST90274840 | TNF-beta levels | TNFB | lymphotoxin-alpha measurement | 11792 European |
| GCST90274841 | Tumor necrosis factor receptor superfamily member 9 levels | TNFRSF9 | tumor necrosis factor receptor superfamily member 9 measurement | 11784 European |
| GCST90274842 | Tumor necrosis factor ligand superfamily member 14 levels | TNFSF14 | tumor necrosis factor ligand superfamily member 14 measurement | 11793 European |
| GCST90274843 | TNF-related apoptosis-inducing ligand levels | TRAIL | TNF-related apoptosis-inducing ligand measurement | 14735 European |
| GCST90274844 | TNF-related activation-induced cytokine levels | TRANCE | TNF-related activation-induced cytokine measurement | 14736 European |
| GCST90274845 | Thymic stromal lymphopoietin levels | TSLP | thymic stromal lymphopoietin measurement | 11793 European |
| GCST90274846 | Tumor necrosis factor ligand superfamily member 12 levels | TNF | tumor necrosis factor ligand superfamily member 12 measurement | 14736 European |
| GCST90274847 | Urokinase-type plasminogen activator levels | uPA | urokinase-type plasminogen activator measurement | 14734 European |
| GCST90274848 | Vascular endothelial growth factor A levels | VEGF_A | vascular endothelial growth factor A measurement | 14744 European |

**Supplementary Table 2.** All SNPs information used as IVs.

| Symbol | chr | pos | effect_allele | other_allele | beta | se | eaf | pval | SNP | samplesize | R2 | F |
| --- | --- | --- | --- | --- | --- | --- | --- | --- | --- | --- | --- | --- |
| 4EBP1 | 1 | 80975190 | T | G | 0.0588 | 0.0123 | 0.6475 | 1.75E-06 | rs356283 | 14730 | 0.001549061 | 22.84996072 |
| 4EBP1 | 1 | 240804510 | A | G | -0.0884 | 0.0175 | 0.8334 | 4.39E-07 | rs10926313 | 14288 | 0.001782716 | 25.51335881 |
| 4EBP1 | 2 | 38198906 | T | G | 0.2607 | 0.0521 | 0.015 | 5.62E-07 | rs76686678 | 14730 | 0.001696939 | 25.0350028 |
| 4EBP1 | 3 | 186455546 | T | C | 0.0594 | 0.0119 | 0.5711 | 5.99E-07 | rs5030072 | 14716 | 0.001690264 | 24.91265075 |
| 4EBP1 | 4 | 187158034 | A | G | -0.1305 | 0.0116 | 0.5102 | 2.32E-29 | rs3733402 | 14736 | 0.008515523 | 126.5453227 |
| 4EBP1 | 5 | 176842474 | T | C | 0.0926 | 0.0152 | 0.2679 | 1.11E-09 | rs2731672 | 11783 | 0.003139881 | 37.107447 |
| 4EBP1 | 7 | 17594314 | T | C | 0.0754 | 0.0142 | 0.2938 | 1.10E-07 | rs6963617 | 14288 | 0.00196942 | 28.19065763 |
| 4EBP1 | 11 | 68921211 | T | C | -0.0593 | 0.0124 | 0.3383 | 1.73E-06 | rs10792025 | 14727 | 0.001550522 | 22.86688634 |
| 4EBP1 | 12 | 23923166 | T | C | -0.2226 | 0.0474 | 0.0227 | 2.65E-06 | rs181095999 | 14736 | 0.001494392 | 22.05132496 |
| 4EBP1 | 16 | 84586319 | T | C | 0.0791 | 0.0169 | 0.358 | 2.86E-06 | rs114302245 | 10894 | 0.002006872 | 21.90280918 |
| 4EBP1 | 17 | 15470414 | T | C | -0.0995 | 0.0214 | 0.8975 | 3.33E-06 | rs2856226 | 12404 | 0.001739805 | 21.61466875 |
| 4EBP1 | 20 | 44566861 | C | G | 0.2235 | 0.0486 | 0.9827 | 4.25E-06 | rs137887001 | 14288 | 0.001477981 | 21.14568316 |
| ADA | 1 | 57353848 | A | G | 0.139 | 0.0293 | 0.0462 | 2.10E-06 | rs115657851 | 14715 | 0.00152711 | 22.50273617 |
| ADA | 1 | 150902178 | A | G | 0.3552 | 0.077 | 0.9905 | 3.97E-06 | rs75492374 | 11139 | 0.001906731 | 21.27582844 |
| ADA | 1 | 204667577 | T | C | 0.1673 | 0.0358 | 0.0316 | 2.97E-06 | rs541944924 | 14080 | 0.001548639 | 21.83554996 |
| ADA | 2 | 144650434 | T | C | 0.2044 | 0.044 | 0.0243 | 3.39E-06 | rs111478357 | 13801 | 0.001561232 | 21.57712059 |
| ADA | 4 | 5801734 | T | C | -0.0925 | 0.0199 | 0.905 | 3.35E-06 | rs10024178 | 14716 | 0.001466055 | 21.60320989 |
| ADA | 4 | 75665562 | A | T | 0.2754 | 0.0584 | 0.9857 | 2.41E-06 | rs189104742 | 14729 | 0.001507557 | 22.2353107 |
| ADA | 4 | 124571895 | T | C | 0.1281 | 0.0258 | 0.9456 | 6.87E-07 | rs62319741 | 14733 | 0.001670481 | 24.64903311 |
| ADA | 7 | 22807634 | A | G | 0.0598 | 0.0122 | 0.656 | 9.50E-07 | rs1608554 | 14733 | 0.00162811 | 24.02280673 |
| ADA | 7 | 80678923 | T | C | 0.0562 | 0.0122 | 0.5989 | 4.09E-06 | rs2527856 | 14288 | 0.001482986 | 21.21740049 |
| ADA | 10 | 8502517 | A | T | 0.5548 | 0.1204 | 0.0104 | 4.07E-06 | rs4749761 | 6862 | 0.003084803 | 21.22723036 |
| ADA | 12 | 65118323 | C | G | -0.0551 | 0.0119 | 0.5267 | 3.65E-06 | rs2620728 | 14288 | 0.001498258 | 21.4362335 |
| ADA | 18 | 917376 | A | T | 0.3494 | 0.0754 | 0.0125 | 3.59E-06 | rs117645472 | 11095 | 0.001931684 | 21.46964265 |
| ADA | 20 | 43120683 | T | C | 0.8932 | 0.026 | 0.051 | 1.00E-200 | rs112665079 | 14720 | 0.07422471 | 1180.026394 |
| ADA | 20 | 43223930 | T | C | 0.9687 | 0.0448 | 0.0189 | 1.10E-103 | rs80212763 | 14249 | 0.031769965 | 467.478465 |
| ADA | 20 | 43300667 | A | G | 0.12 | 0.0147 | 0.32 | 3.26E-16 | rs12479560 | 12404 | 0.005343664 | 66.62815571 |
| ADA | 22 | 37921425 | A | G | -0.0599 | 0.0131 | 0.2529 | 4.82E-06 | rs7292320 | 14729 | 0.001417496 | 20.90509176 |
| ARTN | 1 | 921716 | A | C | -0.0664 | 0.0144 | 0.5539 | 4.01E-06 | rs13303278 | 10265 | 0.002067062 | 21.25820299 |
| ARTN | 1 | 17628383 | T | G | 0.0632 | 0.0137 | 0.6627 | 3.97E-06 | rs3003450 | 11762 | 0.001806038 | 21.27742993 |
| ARTN | 1 | 225057589 | A | C | -0.3226 | 0.0682 | 0.9882 | 2.24E-06 | rs76672219 | 11291 | 0.001977734 | 22.37087867 |
| ARTN | 3 | 111720183 | A | G | 0.0833 | 0.0166 | 0.1972 | 5.22E-07 | rs62277657 | 11777 | 0.002133593 | 25.17677319 |
| ARTN | 4 | 4424044 | A | G | -0.0811 | 0.0176 | 0.84 | 4.07E-06 | rs138311590 | 11758 | 0.0018026 | 21.22963338 |
| ARTN | 4 | 156930775 | C | G | 0.0692 | 0.014 | 0.626 | 7.70E-07 | rs9684768 | 11330 | 0.002151745 | 24.42752397 |
| ARTN | 5 | 103466564 | A | G | -0.0873 | 0.0189 | 0.8494 | 3.86E-06 | rs17340161 | 11330 | 0.001879567 | 21.33183469 |
| ARTN | 6 | 143047898 | T | C | 0.0853 | 0.0181 | 0.1545 | 2.44E-06 | rs9496445 | 11768 | 0.001883733 | 22.20583441 |
| ARTN | 7 | 106961661 | A | G | 0.311 | 0.0639 | 0.0191 | 1.13E-06 | rs142970662 | 9834 | 0.002402946 | 23.6826735 |
| ARTN | 8 | 3686552 | A | T | -0.079 | 0.0162 | 0.6759 | 1.08E-06 | rs4993886 | 8371 | 0.002832793 | 23.774992 |
| ARTN | 8 | 19493177 | A | G | -0.2047 | 0.044 | 0.0245 | 3.28E-06 | rs55885546 | 11778 | 0.001834262 | 21.63996626 |
| ARTN | 9 | 92208227 | A | G | -0.0674 | 0.0136 | 0.5323 | 7.20E-07 | rs1329733 | 11330 | 0.002163075 | 24.55643437 |
| ARTN | 9 | 140239588 | T | C | 0.2119 | 0.0435 | 0.038 | 1.11E-06 | rs142585779 | 10266 | 0.002306107 | 23.72459367 |
| ARTN | 10 | 52447591 | T | C | 0.0874 | 0.0186 | 0.8262 | 2.62E-06 | rs117212234 | 11330 | 0.001945009 | 22.07599603 |
| ARTN | 11 | 112934470 | T | G | -0.2687 | 0.0588 | 0.028 | 4.88E-06 | rs569463048 | 7943 | 0.00262214 | 20.87715493 |
| ARTN | 11 | 123394636 | C | G | 0.0679 | 0.0141 | 0.318 | 1.47E-06 | rs77502336 | 11775 | 0.001965558 | 23.18609182 |
| ARTN | 12 | 81724190 | T | C | 0.1703 | 0.0362 | 0.0344 | 2.55E-06 | rs118115625 | 11778 | 0.001875536 | 22.12780838 |
| ARTN | 12 | 130004146 | A | G | 0.2112 | 0.0451 | 0.9758 | 2.83E-06 | rs148226005 | 11765 | 0.001860519 | 21.92607571 |
| ARTN | 18 | 54688939 | T | C | -0.07 | 0.0153 | 0.7417 | 4.76E-06 | rs1370215 | 11330 | 0.001844088 | 20.92842513 |
| ARTN | 19 | 55422034 | C | G | -0.0881 | 0.0176 | 0.8122 | 5.57E-07 | rs6509909 | 11330 | 0.002206669 | 25.05242737 |
| ARTN | 22 | 25646493 | T | C | 0.0765 | 0.0167 | 0.7151 | 4.63E-06 | rs9941952 | 11774 | 0.001779068 | 20.98051527 |
| AXIN1 | 3 | 128431622 | A | G | 0.0626 | 0.0134 | 0.4935 | 2.99E-06 | rs2712427 | 11345 | 0.001919994 | 21.82038965 |
| AXIN1 | 5 | 78787853 | A | G | 0.1447 | 0.0305 | 0.9489 | 2.09E-06 | rs115455827 | 11792 | 0.001905117 | 22.50420722 |
| AXIN1 | 6 | 151334530 | A | C | 0.2444 | 0.0522 | 0.0197 | 2.84E-06 | rs117097664 | 11345 | 0.001928495 | 21.9171878 |
| AXIN1 | 7 | 77960243 | T | C | -0.067 | 0.0133 | 0.5969 | 4.71E-07 | rs2691530 | 11793 | 0.002147279 | 25.37304936 |
| AXIN1 | 8 | 102489704 | A | G | -0.1229 | 0.0242 | 0.9127 | 3.80E-07 | rs2470622 | 11345 | 0.002268205 | 25.78674144 |
| AXIN1 | 12 | 90111252 | A | T | 0.1657 | 0.0359 | 0.9437 | 3.92E-06 | rs7136254 | 9827 | 0.00216319 | 21.29941732 |
| AXIN1 | 15 | 81221771 | T | C | 0.1554 | 0.0329 | 0.9514 | 2.32E-06 | rs7171268 | 11345 | 0.001962694 | 22.30661465 |
| AXIN1 | 18 | 50513818 | A | G | -0.212 | 0.042 | 0.0295 | 4.47E-07 | rs148317708 | 10919 | 0.002327974 | 25.47379124 |
| AXIN1 | 18 | 77253338 | T | C | 0.0692 | 0.0148 | 0.6047 | 2.93E-06 | rs428324 | 10281 | 0.002121929 | 21.85769014 |
| Beta-NGF | 1 | 115829943 | A | C | -0.0797 | 0.0122 | 0.3498 | 6.46E-11 | rs6328 | 13224 | 0.00321688 | 42.67084997 |
| Beta-NGF | 4 | 96824143 | A | G | 0.0584 | 0.0126 | 0.3152 | 3.57E-06 | rs72673086 | 12858 | 0.001667962 | 21.47914779 |
| Beta-NGF | 4 | 164064099 | T | C | -0.1187 | 0.0258 | 0.9491 | 4.21E-06 | rs4017 | 14742 | 0.00143378 | 21.16426071 |
| Beta-NGF | 4 | 166807640 | A | G | 0.2208 | 0.0462 | 0.0229 | 1.76E-06 | rs17689534 | 13421 | 0.00169899 | 22.83754749 |
| Beta-NGF | 5 | 132971762 | T | G | 0.1213 | 0.0247 | 0.9435 | 9.06E-07 | rs12188775 | 14737 | 0.001633836 | 24.11397198 |
| Beta-NGF | 6 | 838092 | T | C | 0.0853 | 0.0185 | 0.8904 | 4.01E-06 | rs77493302 | 14743 | 0.001439935 | 21.25669231 |
| Beta-NGF | 6 | 31457874 | A | C | -0.0685 | 0.0143 | 0.3918 | 1.67E-06 | rs2904780 | 11538 | 0.001984795 | 22.94213235 |
| Beta-NGF | 6 | 32192617 | T | C | 0.1203 | 0.0262 | 0.9514 | 4.40E-06 | rs397081 | 14743 | 0.00142798 | 21.07995856 |
| Beta-NGF | 6 | 153400418 | T | G | 0.0629 | 0.0137 | 0.2135 | 4.41E-06 | rs9479501 | 14729 | 0.00142911 | 21.07663047 |
| Beta-NGF | 7 | 30944899 | A | G | 0.1389 | 0.0276 | 0.0802 | 4.84E-07 | rs12533747 | 14295 | 0.001768615 | 25.32360679 |
| Beta-NGF | 7 | 130302087 | A | C | -0.1617 | 0.0352 | 0.9727 | 4.35E-06 | rs17647697 | 14741 | 0.001429508 | 21.09967595 |
| Beta-NGF | 7 | 151019021 | C | G | 0.1867 | 0.0408 | 0.966 | 4.74E-06 | rs12539643 | 11344 | 0.001842473 | 20.9359048 |
| Beta-NGF | 8 | 13332042 | T | C | 0.0578 | 0.0117 | 0.6636 | 7.81E-07 | rs62494116 | 14729 | 0.001654214 | 24.40197501 |
| Beta-NGF | 8 | 122948812 | A | G | 0.0626 | 0.0126 | 0.719 | 6.76E-07 | rs1878359 | 14740 | 0.001671797 | 24.6801983 |
| Beta-NGF | 9 | 90362040 | T | C | -0.0775 | 0.0118 | 0.4965 | 5.11E-11 | rs3128517 | 14295 | 0.003008477 | 43.1299172 |
| Beta-NGF | 10 | 89839430 | A | G | -0.075 | 0.0148 | 0.1928 | 4.03E-07 | rs12259196 | 13244 | 0.001935257 | 25.67636303 |
| Beta-NGF | 14 | 69285337 | C | G | -0.055 | 0.0117 | 0.5283 | 2.59E-06 | rs4899264 | 14295 | 0.001543472 | 22.0949432 |
| Beta-NGF | 14 | 83608081 | A | T | -0.2055 | 0.0432 | 0.9685 | 1.97E-06 | rs182658308 | 10894 | 0.002072849 | 22.62436614 |
| Beta-NGF | 16 | 3327943 | A | G | 0.2773 | 0.0602 | 0.0196 | 4.10E-06 | rs140072192 | 11925 | 0.001776136 | 21.21455434 |
| Beta-NGF | 18 | 55441626 | T | C | -0.1249 | 0.0259 | 0.1005 | 1.42E-06 | rs62092633 | 11344 | 0.002045831 | 23.25138213 |
| Beta-NGF | 19 | 16434937 | T | C | 0.0607 | 0.0124 | 0.3088 | 9.82E-07 | rs34559191 | 13675 | 0.001749228 | 23.95909947 |
| Beta-NGF | 19 | 43780396 | T | C | -0.271 | 0.0565 | 0.014 | 1.61E-06 | rs117164089 | 13421 | 0.001711248 | 23.00260187 |
| Beta-NGF | 21 | 43942626 | T | C | 0.2541 | 0.0556 | 0.0235 | 4.87E-06 | rs148834134 | 13421 | 0.001553816 | 20.88310266 |
| Beta-NGF | 22 | 49775973 | C | G | -0.2164 | 0.0467 | 0.0256 | 3.59E-06 | rs13058191 | 14295 | 0.001499839 | 21.46940387 |
| CASP-8 | 1 | 2338015 | T | C | -0.2016 | 0.0422 | 0.9714 | 1.78E-06 | rs34154371 | 13232 | 0.001721798 | 22.81867935 |
| CASP-8 | 1 | 157270515 | A | C | -0.0812 | 0.0167 | 0.8466 | 1.16E-06 | rs12073499 | 14295 | 0.001651115 | 23.63841485 |
| CASP-8 | 2 | 202164805 | C | G | -0.1987 | 0.0173 | 0.8696 | 1.56E-30 | rs56328050 | 14743 | 0.008868475 | 131.8999432 |
| CASP-8 | 2 | 231090015 | A | T | -0.0806 | 0.0162 | 0.1582 | 6.51E-07 | rs11695193 | 14743 | 0.001676199 | 24.75033806 |
| CASP-8 | 3 | 152332673 | T | C | 0.0781 | 0.0168 | 0.856 | 3.34E-06 | rs11709039 | 14743 | 0.001463732 | 21.60849823 |
| CASP-8 | 5 | 180339648 | A | G | 0.3474 | 0.0683 | 0.0145 | 3.65E-07 | rs148608719 | 12745 | 0.002025805 | 25.86723831 |
| CASP-8 | 6 | 158193698 | A | G | 0.0681 | 0.0145 | 0.6981 | 2.65E-06 | rs1034059 | 14296 | 0.001540544 | 22.05451226 |
| CASP-8 | 7 | 61833768 | T | C | 0.4195 | 0.0912 | 0.9851 | 4.23E-06 | rs187405204 | 6257 | 0.003370094 | 21.15121952 |
| CASP-8 | 8 | 5557775 | C | G | 0.1095 | 0.0238 | 0.9304 | 4.21E-06 | rs111764025 | 14731 | 0.00143489 | 21.1648579 |
| CASP-8 | 9 | 22742536 | A | G | -0.2001 | 0.0428 | 0.9804 | 2.94E-06 | rs78449258 | 14744 | 0.001480294 | 21.85484466 |
| CASP-8 | 10 | 84027526 | T | C | 0.2044 | 0.0412 | 0.978 | 7.01E-07 | rs73306603 | 14741 | 0.001666924 | 24.60981922 |
| CASP-8 | 11 | 63817395 | C | G | -0.3615 | 0.0776 | 0.0099 | 3.19E-06 | rs140844269 | 12330 | 0.001756978 | 21.69815013 |
| CASP-8 | 12 | 62645486 | C | G | -0.0858 | 0.0165 | 0.1545 | 1.99E-07 | rs1032417 | 14296 | 0.001887867 | 27.03621712 |
| CASP-8 | 20 | 44566861 | C | G | 0.2318 | 0.0486 | 0.9827 | 1.85E-06 | rs137887001 | 14296 | 0.001588727 | 22.74539918 |
| CCL11 | 1 | 159175354 | A | G | 0.0749 | 0.0114 | 0.5547 | 5.03E-11 | rs12075 | 14731 | 0.002921803 | 43.16134456 |
| CCL11 | 3 | 42906116 | T | C | -0.3316 | 0.0225 | 0.9289 | 3.69E-49 | rs2228467 | 14733 | 0.014528372 | 217.1726087 |
| CCL11 | 3 | 43179320 | T | C | 0.1502 | 0.0303 | 0.0433 | 7.16E-07 | rs79684468 | 14286 | 0.001717108 | 24.56935775 |
| CCL11 | 3 | 46258902 | T | C | 0.0785 | 0.0123 | 0.3561 | 1.75E-10 | rs2201150 | 14286 | 0.002843033 | 40.72567455 |
| CCL11 | 4 | 104507060 | A | C | -0.3374 | 0.0714 | 0.0128 | 2.30E-06 | rs139597204 | 12303 | 0.001811737 | 22.32662754 |
| CCL11 | 5 | 118058126 | A | C | -0.0656 | 0.0137 | 0.2333 | 1.68E-06 | rs6894241 | 14715 | 0.001555715 | 22.92490333 |
| CCL11 | 7 | 75495667 | A | G | 0.2002 | 0.0205 | 0.09 | 1.58E-22 | rs757973 | 14713 | 0.006440404 | 95.35893338 |
| CCL11 | 8 | 11700967 | A | T | -0.0913 | 0.0189 | 0.1104 | 1.36E-06 | rs73209015 | 14728 | 0.001581928 | 23.33237605 |
| CCL11 | 10 | 128183195 | T | G | 0.1929 | 0.0422 | 0.9754 | 4.85E-06 | rs79432525 | 14247 | 0.001464467 | 20.89193099 |
| CCL11 | 11 | 24773107 | A | G | -0.0609 | 0.0131 | 0.6155 | 3.34E-06 | rs1564995 | 14286 | 0.001510514 | 21.60882686 |
| CCL11 | 11 | 95274487 | T | G | 0.1017 | 0.0208 | 0.9023 | 1.01E-06 | rs34536806 | 14286 | 0.001670623 | 23.90311119 |
| CCL11 | 12 | 105757994 | A | G | -0.1138 | 0.0244 | 0.9282 | 3.10E-06 | rs35543857 | 14286 | 0.001520315 | 21.74923907 |
| CCL11 | 16 | 24006879 | T | C | 0.2107 | 0.0451 | 0.9774 | 2.99E-06 | rs114744647 | 14730 | 0.001479552 | 21.82312881 |
| CCL11 | 16 | 80051931 | T | C | -0.0818 | 0.0133 | 0.7358 | 7.73E-10 | rs9940390 | 14286 | 0.002640853 | 37.82182851 |
| CCL11 | 17 | 12254722 | A | G | 0.1063 | 0.0226 | 0.8771 | 2.56E-06 | rs554698477 | 10894 | 0.002026662 | 22.11922531 |
| CCL11 | 17 | 32619052 | T | C | -0.1215 | 0.0156 | 0.167 | 6.78E-15 | rs79722574 | 14720 | 0.004104021 | 60.65189127 |
| CCL11 | 18 | 1508223 | C | G | 0.0555 | 0.0121 | 0.5296 | 4.50E-06 | rs55843637 | 14286 | 0.001470502 | 21.03557662 |
| CCL11 | 19 | 37955248 | C | G | 0.0817 | 0.016 | 0.8362 | 3.29E-07 | rs2112920 | 14286 | 0.001821804 | 26.07013881 |
| CCL11 | 20 | 49033630 | T | G | 0.2826 | 0.0606 | 0.0125 | 3.11E-06 | rs139476527 | 12933 | 0.001678689 | 21.74362257 |
| CCL11 | 21 | 39593226 | A | G | -0.1678 | 0.0345 | 0.0333 | 1.15E-06 | rs9976282 | 14722 | 0.001604285 | 23.65302656 |
| CCL11 | 22 | 45003109 | A | G | -0.0861 | 0.0187 | 0.1199 | 4.14E-06 | rs73171545 | 14286 | 0.001481728 | 21.19640874 |
| CCL19 | 2 | 7425475 | C | G | 0.0615 | 0.013 | 0.6941 | 2.24E-06 | rs7595241 | 14288 | 0.001563912 | 22.37704479 |
| CCL19 | 2 | 66640363 | C | G | 0.1856 | 0.0384 | 0.9689 | 1.34E-06 | rs10496135 | 14288 | 0.001632347 | 23.35784108 |
| CCL19 | 2 | 204776176 | C | G | -0.0803 | 0.0123 | 0.4754 | 6.65E-11 | rs13010492 | 13422 | 0.003165386 | 42.61437753 |
| CCL19 | 3 | 58516854 | C | G | 0.4485 | 0.0922 | 0.992 | 1.15E-06 | rs113539352 | 11439 | 0.002064322 | 23.65849498 |
| CCL19 | 3 | 132200719 | T | G | 0.2346 | 0.0185 | 0.8822 | 7.53E-37 | rs62292952 | 14728 | 0.010800717 | 160.7879801 |
| CCL19 | 4 | 123839263 | T | C | -0.2096 | 0.045 | 0.0195 | 3.20E-06 | rs79086127 | 14247 | 0.001520454 | 21.69184829 |
| CCL19 | 4 | 145124024 | T | C | 0.0596 | 0.0122 | 0.3904 | 1.03E-06 | rs4554017 | 14288 | 0.001667541 | 23.86228687 |
| CCL19 | 5 | 150442171 | A | C | 0.0551 | 0.012 | 0.4736 | 4.40E-06 | rs3792790 | 14288 | 0.001473428 | 21.08045157 |
| CCL19 | 5 | 174187919 | T | C | 0.0863 | 0.0169 | 0.8559 | 3.28E-07 | rs6870560 | 14732 | 0.001766926 | 26.07289279 |
| CCL19 | 6 | 32444093 | C | G | -0.4884 | 0.0277 | 0.9365 | 1.41E-69 | rs9469127 | 14735 | 0.020662088 | 310.8370804 |
| CCL19 | 6 | 32519041 | A | G | -0.1775 | 0.0206 | 0.8408 | 6.90E-18 | rs28635588 | 9182 | 0.008020981 | 74.22798423 |
| CCL19 | 6 | 125027776 | C | G | 0.0757 | 0.0157 | 0.1687 | 1.42E-06 | rs1415763 | 14731 | 0.001575707 | 23.24521069 |
| CCL19 | 7 | 3911280 | A | G | 0.0729 | 0.0154 | 0.8219 | 2.20E-06 | rs10242459 | 14729 | 0.001519078 | 22.40549998 |
| CCL19 | 8 | 61418130 | T | C | -0.3645 | 0.0756 | 0.989 | 1.43E-06 | rs73257451 | 11337 | 0.002046274 | 23.24207253 |
| CCL19 | 9 | 34710084 | A | C | -0.1464 | 0.017 | 0.8639 | 7.19E-18 | rs11574915 | 14733 | 0.005008555 | 74.15242382 |
| CCL19 | 9 | 35612978 | A | G | 0.1238 | 0.0265 | 0.0534 | 2.99E-06 | rs34791102 | 14735 | 0.001478961 | 21.82180096 |
| CCL19 | 12 | 19813981 | A | T | -0.0697 | 0.0135 | 0.2452 | 2.43E-07 | rs6486995 | 14735 | 0.001805772 | 26.65256848 |
| CCL19 | 12 | 111904371 | A | T | -0.0801 | 0.0132 | 0.5095 | 1.29E-09 | rs4766578 | 11785 | 0.003114818 | 36.81658148 |
| CCL19 | 13 | 113647321 | A | G | -0.0671 | 0.0137 | 0.2653 | 9.69E-07 | rs4907572 | 14722 | 0.001626784 | 23.98528607 |
| CCL19 | 14 | 76855291 | A | G | -0.2939 | 0.0616 | 0.0119 | 1.83E-06 | rs138108512 | 13422 | 0.001693108 | 22.76004043 |
| CCL19 | 16 | 57300587 | A | T | 0.1349 | 0.0294 | 0.9557 | 4.47E-06 | rs74764632 | 14734 | 0.001426883 | 21.05088134 |
| CCL19 | 17 | 14918425 | T | C | -0.2707 | 0.0574 | 0.0151 | 2.40E-06 | rs147708384 | 13801 | 0.001608951 | 22.23769583 |
| CCL19 | 22 | 17731243 | A | G | -0.1724 | 0.036 | 0.0585 | 1.68E-06 | rs138440733 | 12404 | 0.001845464 | 22.92975904 |
| CCL20 | 1 | 32260562 | T | C | 0.2585 | 0.0548 | 0.9859 | 2.39E-06 | rs11582772 | 14243 | 0.001559842 | 22.24841055 |
| CCL20 | 1 | 238606022 | T | C | -0.0953 | 0.0208 | 0.0967 | 4.61E-06 | rs111674022 | 14288 | 0.001467067 | 20.9893184 |
| CCL20 | 2 | 228661828 | T | C | -0.0996 | 0.0128 | 0.326 | 7.18E-15 | rs10207134 | 14287 | 0.004220084 | 60.53937563 |
| CCL20 | 6 | 1448190 | T | C | 0.0637 | 0.0135 | 0.3674 | 2.38E-06 | rs11242693 | 12404 | 0.001791722 | 22.26082713 |
| CCL20 | 6 | 32635998 | T | G | -0.076 | 0.0148 | 0.215 | 2.82E-07 | rs9274623 | 14288 | 0.001842178 | 26.3659217 |
| CCL20 | 6 | 40998167 | T | C | 0.1459 | 0.0185 | 0.883 | 3.11E-15 | rs742493 | 14735 | 0.004203274 | 62.18822707 |
| CCL20 | 8 | 22584718 | T | C | 0.0573 | 0.012 | 0.5396 | 1.80E-06 | rs1129474 | 14288 | 0.001593246 | 22.79743342 |
| CCL20 | 9 | 115519904 | T | C | 0.0636 | 0.0127 | 0.3159 | 5.50E-07 | rs2796032 | 14718 | 0.001701056 | 25.07539425 |
| CCL20 | 10 | 127693479 | A | G | 0.1939 | 0.0414 | 0.9774 | 2.82E-06 | rs41302923 | 14726 | 0.001487386 | 21.93289445 |
| CCL20 | 11 | 42142787 | T | C | 0.1191 | 0.026 | 0.9413 | 4.63E-06 | rs10837780 | 14288 | 0.001466453 | 20.98050953 |
| CCL20 | 12 | 19657540 | A | G | 0.2057 | 0.0422 | 0.9739 | 1.09E-06 | rs73072893 | 13230 | 0.001792687 | 23.75625747 |
| CCL20 | 12 | 76655980 | T | C | 0.3494 | 0.0713 | 0.9856 | 9.56E-07 | rs564398411 | 10407 | 0.002302185 | 24.0095086 |
| CCL20 | 12 | 104149874 | A | G | 0.0635 | 0.0128 | 0.6933 | 7.02E-07 | rs4981022 | 14721 | 0.001669032 | 24.60755723 |
| CCL20 | 14 | 94625543 | T | C | -0.1512 | 0.0328 | 0.0376 | 4.03E-06 | rs151092565 | 14728 | 0.001440741 | 21.24696564 |
| CCL20 | 14 | 106782532 | A | T | -0.1602 | 0.0344 | 0.0632 | 3.21E-06 | rs2003431 | 9786 | 0.002211269 | 21.68300006 |
| CCL20 | 16 | 63795822 | A | T | 0.0616 | 0.0134 | 0.3426 | 4.29E-06 | rs6498926 | 12844 | 0.001642622 | 21.12925558 |
| CCL20 | 17 | 67136325 | C | G | -0.185 | 0.0359 | 0.9688 | 2.56E-07 | rs117753190 | 14243 | 0.00186099 | 26.55177577 |
| CCL20 | 17 | 72761195 | C | G | -0.2256 | 0.0429 | 0.9694 | 1.45E-07 | rs117900576 | 13224 | 0.002086861 | 27.65017718 |
| CCL20 | 18 | 56487606 | T | C | -0.0736 | 0.0158 | 0.1755 | 3.19E-06 | rs6420556 | 14288 | 0.00151639 | 21.6960493 |
| CCL20 | 21 | 32961256 | T | C | 0.0804 | 0.0166 | 0.1452 | 1.28E-06 | rs35833676 | 14732 | 0.001589803 | 23.45508213 |
| CCL20 | 21 | 44005002 | A | G | -0.1315 | 0.0276 | 0.9476 | 1.89E-06 | rs13049624 | 14288 | 0.001586253 | 22.69721365 |
| CCL20 | 22 | 49877754 | T | G | -0.1184 | 0.0257 | 0.9406 | 4.09E-06 | rs5769672 | 14732 | 0.001438634 | 21.22160344 |
| CCL23 | 1 | 161582200 | C | G | 0.0603 | 0.0132 | 0.608 | 4.92E-06 | rs74127049 | 13422 | 0.001552368 | 20.86517556 |
| CCL23 | 1 | 203441260 | A | G | -0.3061 | 0.0626 | 0.0116 | 1.01E-06 | rs146074782 | 12935 | 0.001845056 | 23.9062159 |
| CCL23 | 2 | 241647342 | T | C | 0.0983 | 0.0215 | 0.9113 | 4.83E-06 | rs1001495 | 13650 | 0.001529089 | 20.90097175 |
| CCL23 | 3 | 6127208 | T | C | 0.2157 | 0.0449 | 0.0255 | 1.56E-06 | rs143910182 | 14730 | 0.001564318 | 23.07536806 |
| CCL23 | 3 | 14445911 | A | G | -0.21 | 0.0426 | 0.0278 | 8.24E-07 | rs116683909 | 14724 | 0.001647697 | 24.29743315 |
| CCL23 | 3 | 40054358 | A | G | 0.1273 | 0.0278 | 0.048 | 4.67E-06 | rs74491711 | 14735 | 0.001421018 | 20.96564675 |
| CCL23 | 3 | 46462144 | T | C | 0.0585 | 0.0127 | 0.6736 | 4.10E-06 | rs4317138 | 14288 | 0.00148282 | 21.21502239 |
| CCL23 | 4 | 77373079 | T | C | 0.0574 | 0.0114 | 0.4869 | 4.78E-07 | rs2870238 | 14736 | 0.001717465 | 25.3486675 |
| CCL23 | 6 | 86144743 | C | G | 0.1164 | 0.0237 | 0.9291 | 9.04E-07 | rs12204524 | 14727 | 0.00163525 | 24.1184995 |
| CCL23 | 7 | 3238978 | T | C | -0.0548 | 0.0118 | 0.5907 | 3.42E-06 | rs4719850 | 14726 | 0.001462435 | 21.56443654 |
| CCL23 | 7 | 17545964 | A | G | -0.1497 | 0.0319 | 0.0393 | 2.70E-06 | rs73071153 | 14728 | 0.001493034 | 22.01928716 |
| CCL23 | 10 | 18295482 | A | G | 0.0574 | 0.0125 | 0.3093 | 4.39E-06 | rs1926742 | 14725 | 0.00142997 | 21.08359996 |
| CCL23 | 10 | 34433796 | A | G | -0.2064 | 0.0437 | 0.9788 | 2.32E-06 | rs77354000 | 14735 | 0.001511643 | 22.30476031 |
| CCL23 | 10 | 132905425 | A | G | 0.0971 | 0.0186 | 0.1154 | 1.79E-07 | rs11017721 | 14288 | 0.001903766 | 27.24907571 |
| CCL23 | 11 | 1989274 | A | G | -0.0692 | 0.014 | 0.7293 | 7.70E-07 | rs112492 | 13224 | 0.00184413 | 24.42814166 |
| CCL23 | 11 | 84372512 | A | T | 0.0927 | 0.0202 | 0.0922 | 4.45E-06 | rs17735284 | 14725 | 0.001428173 | 21.05706017 |
| CCL23 | 11 | 115081786 | C | G | 0.224 | 0.0416 | 0.0223 | 7.26E-08 | rs77083410 | 14734 | 0.00196397 | 28.99014717 |
| CCL23 | 12 | 57405049 | A | G | 0.0948 | 0.0207 | 0.0846 | 4.66E-06 | rs73114426 | 14731 | 0.001421759 | 20.97089745 |
| CCL23 | 17 | 21386459 | A | G | -0.0643 | 0.0137 | 0.7287 | 2.69E-06 | rs12949647 | 14288 | 0.00153936 | 22.02520786 |
| CCL23 | 17 | 34140999 | T | G | -0.2256 | 0.0291 | 0.0643 | 9.00E-15 | rs7225405 | 11538 | 0.005182094 | 60.09203692 |
| CCL23 | 17 | 34195180 | A | C | -0.3246 | 0.0413 | 0.9561 | 3.85E-15 | rs117639761 | 14736 | 0.004174463 | 61.76436493 |
| CCL23 | 17 | 34326215 | A | C | -0.5147 | 0.0158 | 0.1497 | 1.00E-200 | rs712048 | 14723 | 0.067231344 | 1061.048323 |
| CCL23 | 17 | 34445397 | T | C | -0.1285 | 0.025 | 0.0956 | 2.75E-07 | rs16971993 | 14288 | 0.001845663 | 26.41590185 |
| CCL23 | 17 | 34816052 | T | C | -0.2538 | 0.0465 | 0.0298 | 4.81E-08 | rs77527696 | 13829 | 0.002149572 | 29.78615986 |
| CCL23 | 19 | 45416741 | T | C | 0.0669 | 0.0138 | 0.2405 | 1.25E-06 | rs438811 | 14720 | 0.001594019 | 23.49822464 |
| CCL23 | 22 | 51076281 | T | C | -0.1397 | 0.0285 | 0.0559 | 9.50E-07 | rs113959305 | 13224 | 0.001813643 | 24.02356218 |
| CCL25 | 1 | 23748852 | C | G | 0.0566 | 0.0119 | 0.4781 | 1.97E-06 | rs11589432 | 14287 | 0.001580923 | 22.61924682 |
| CCL25 | 1 | 160762078 | A | C | -0.1934 | 0.0406 | 0.0225 | 1.90E-06 | rs143132666 | 14734 | 0.001537701 | 22.68829796 |
| CCL25 | 2 | 130959219 | T | C | -0.2782 | 0.0609 | 0.0129 | 4.92E-06 | rs149395110 | 12880 | 0.001617561 | 20.8647038 |
| CCL25 | 3 | 144213414 | A | G | 0.0941 | 0.0198 | 0.103 | 2.01E-06 | rs7611785 | 14736 | 0.001530397 | 22.58343079 |
| CCL25 | 6 | 67085077 | A | G | -0.0777 | 0.0163 | 0.846 | 1.87E-06 | rs851850 | 14288 | 0.001587835 | 22.71987999 |
| CCL25 | 7 | 155146782 | T | C | -0.0755 | 0.0161 | 0.1668 | 2.74E-06 | rs7806274 | 13667 | 0.001606463 | 21.98763874 |
| CCL25 | 8 | 10694001 | T | C | 0.1437 | 0.0297 | 0.0428 | 1.31E-06 | rs111437511 | 14733 | 0.001586426 | 23.40678027 |
| CCL25 | 8 | 23781453 | T | C | -0.0546 | 0.0116 | 0.5447 | 2.52E-06 | rs1705699 | 14714 | 0.001503437 | 22.15186375 |
| CCL25 | 8 | 42100809 | A | G | 0.0769 | 0.0142 | 0.7856 | 6.11E-08 | rs12114935 | 14732 | 0.001986784 | 29.3235825 |
| CCL25 | 9 | 86838024 | A | T | -0.2681 | 0.0579 | 0.9693 | 3.65E-06 | rs11140450 | 10797 | 0.001981855 | 21.43660699 |
| CCL25 | 9 | 125200862 | T | C | 0.3717 | 0.0777 | 0.9916 | 1.72E-06 | rs116534774 | 11139 | 0.002050244 | 22.88047838 |
| CCL25 | 9 | 136155000 | T | C | -0.2482 | 0.0166 | 0.1875 | 1.52E-50 | rs635634 | 11785 | 0.018616437 | 223.5186002 |
| CCL25 | 10 | 29446793 | A | G | 0.2192 | 0.0478 | 0.9825 | 4.52E-06 | rs79990760 | 14725 | 0.001426101 | 21.02646744 |
| CCL25 | 11 | 24600146 | A | G | 0.0546 | 0.0117 | 0.5707 | 3.06E-06 | rs11028036 | 14728 | 0.001476482 | 21.77482045 |
| CCL25 | 11 | 50675038 | T | C | -0.0822 | 0.018 | 0.6982 | 4.96E-06 | rs200184122 | 9830 | 0.002117019 | 20.85020142 |
| CCL25 | 11 | 64434151 | T | C | -0.0865 | 0.0181 | 0.8838 | 1.76E-06 | rs10792444 | 14732 | 0.001547892 | 22.83579322 |
| CCL25 | 11 | 75419643 | A | G | 0.0548 | 0.0119 | 0.3757 | 4.12E-06 | rs636479 | 14731 | 0.001437508 | 21.20353282 |
| CCL25 | 12 | 578100 | A | G | -0.1159 | 0.0116 | 0.4365 | 1.66E-23 | rs7296588 | 14725 | 0.006733816 | 99.81410159 |
| CCL25 | 12 | 81177765 | A | G | -0.0637 | 0.0133 | 0.6502 | 1.67E-06 | rs7137942 | 12404 | 0.001845914 | 22.93535952 |
| CCL25 | 13 | 22284926 | T | C | -0.0624 | 0.0122 | 0.3844 | 3.14E-07 | rs521795 | 14288 | 0.00182761 | 26.15704757 |
| CCL25 | 15 | 56638156 | A | G | 0.2127 | 0.0449 | 0.0215 | 2.17E-06 | rs147851492 | 14727 | 0.001521482 | 22.43795716 |
| CCL25 | 18 | 2511738 | T | C | -0.0673 | 0.0134 | 0.2475 | 5.10E-07 | rs12606983 | 14715 | 0.001711262 | 25.22095343 |
| CCL25 | 19 | 7827137 | T | C | 0.2321 | 0.0295 | 0.0471 | 3.61E-15 | rs7252764 | 14736 | 0.004183176 | 61.893822 |
| CCL25 | 19 | 8037040 | T | C | 0.3919 | 0.0123 | 0.3275 | 1.00E-200 | rs759817 | 14288 | 0.066337454 | 1015.031472 |
| CCL25 | 19 | 8123295 | T | C | -0.4672 | 0.028 | 0.9355 | 1.67E-62 | rs549735081 | 11327 | 0.023989931 | 278.363902 |
| CCL25 | 19 | 8240265 | A | G | 0.1236 | 0.017 | 0.1421 | 3.58E-13 | rs74256540 | 14288 | 0.003686072 | 52.85405387 |
| CCL25 | 19 | 49206145 | C | G | -0.3279 | 0.0114 | 0.4445 | 6.20E-182 | rs516316 | 14734 | 0.05316511 | 827.2069514 |
| CCL28 | 1 | 64836646 | T | C | -0.1263 | 0.0264 | 0.9486 | 1.72E-06 | rs1514964 | 14734 | 0.001550972 | 22.88441906 |
| CCL28 | 1 | 154994265 | T | C | 0.0534 | 0.0116 | 0.5411 | 4.16E-06 | rs6671688 | 14286 | 0.001481195 | 21.18876924 |
| CCL28 | 1 | 207095623 | C | G | 0.0638 | 0.0111 | 0.5279 | 9.04E-09 | rs291084 | 14726 | 0.002238398 | 33.03211733 |
| CCL28 | 2 | 111889358 | A | G | 0.2696 | 0.0542 | 0.9859 | 6.55E-07 | rs76291845 | 14244 | 0.001734026 | 24.73889054 |
| CCL28 | 2 | 207076122 | T | C | -0.1056 | 0.0198 | 0.0895 | 9.64E-08 | rs112641086 | 14731 | 0.001927203 | 28.4405826 |
| CCL28 | 4 | 102569209 | C | G | -0.0597 | 0.0121 | 0.6079 | 8.06E-07 | rs2866626 | 14285 | 0.001701211 | 24.33980604 |
| CCL28 | 4 | 157065076 | T | C | 0.0531 | 0.0116 | 0.6323 | 4.70E-06 | rs7661151 | 14730 | 0.001420538 | 20.95145036 |
| CCL28 | 5 | 43405459 | T | C | 0.0702 | 0.0122 | 0.4126 | 8.71E-09 | rs4866742 | 12829 | 0.0025742 | 33.10448626 |
| CCL28 | 5 | 84924989 | A | C | 0.2298 | 0.0488 | 0.9815 | 2.49E-06 | rs116782490 | 12633 | 0.001752235 | 22.17132477 |
| CCL28 | 5 | 102824347 | A | G | -0.1684 | 0.0323 | 0.0376 | 1.85E-07 | rs78843608 | 14725 | 0.001842565 | 27.17816546 |
| CCL28 | 5 | 131707429 | A | G | 0.0597 | 0.0128 | 0.5481 | 3.10E-06 | rs2631360 | 11780 | 0.001843241 | 21.74978571 |
| CCL28 | 7 | 115560778 | T | C | 0.1812 | 0.0392 | 0.0244 | 3.79E-06 | rs143400203 | 14722 | 0.001449264 | 21.36413183 |
| CCL28 | 9 | 90419900 | A | C | -0.2853 | 0.0513 | 0.0176 | 2.68E-08 | rs76669782 | 12933 | 0.00238579 | 30.924426 |
| CCL28 | 9 | 136145414 | A | C | -0.115 | 0.0231 | 0.1851 | 6.41E-07 | rs587611953 | 7943 | 0.003110528 | 24.77777782 |
| CCL28 | 10 | 90264140 | T | C | -0.058 | 0.012 | 0.6211 | 1.34E-06 | rs2477954 | 14286 | 0.001632575 | 23.35784062 |
| CCL28 | 10 | 105492625 | T | C | -0.1844 | 0.0395 | 0.0271 | 3.04E-06 | rs78552613 | 14734 | 0.001476948 | 21.79057482 |
| CCL28 | 11 | 25452442 | A | G | -0.0959 | 0.0208 | 0.8571 | 4.02E-06 | rs371663005 | 10894 | 0.001947496 | 21.25351697 |
| CCL28 | 11 | 113953622 | A | G | -0.1935 | 0.0355 | 0.0347 | 5.02E-08 | rs73000929 | 14734 | 0.002012379 | 29.70614368 |
| CCL28 | 12 | 54692061 | A | G | -0.0688 | 0.0118 | 0.4015 | 5.53E-09 | rs6580980 | 14285 | 0.002374107 | 33.99006956 |
| CCL28 | 12 | 55558442 | A | G | 0.3427 | 0.0672 | 0.0122 | 3.40E-07 | rs546951873 | 11273 | 0.002301704 | 26.00235035 |
| CCL28 | 13 | 106647340 | T | G | 0.129 | 0.0282 | 0.9561 | 4.77E-06 | rs77569365 | 14734 | 0.001418222 | 20.92291779 |
| CCL28 | 17 | 7459299 | T | G | -0.0855 | 0.017 | 0.7824 | 4.92E-07 | rs11078696 | 10894 | 0.00231654 | 25.29033886 |
| CCL28 | 18 | 1508223 | C | G | 0.0549 | 0.0119 | 0.5287 | 3.96E-06 | rs55843637 | 14286 | 0.001487625 | 21.28089857 |
| CCL28 | 18 | 74179338 | C | G | 0.2181 | 0.0466 | 0.9802 | 2.87E-06 | rs71363004 | 11982 | 0.001824807 | 21.90115408 |
| CCL28 | 19 | 55238516 | T | G | 0.242 | 0.0523 | 0.0489 | 3.71E-06 | rs113582651 | 8911 | 0.002396948 | 21.40572144 |
| CCL28 | 22 | 38406782 | A | C | 0.0684 | 0.0121 | 0.3659 | 1.58E-08 | rs139902 | 14285 | 0.002231983 | 31.95072037 |
| CCL4 | 2 | 236974412 | A | T | 0.2915 | 0.0617 | 0.0134 | 2.31E-06 | rs116193969 | 14296 | 0.001558887 | 22.31752492 |
| CCL4 | 3 | 756117 | C | G | 0.1956 | 0.0405 | 0.0299 | 1.37E-06 | rs116309267 | 14723 | 0.001581772 | 23.3221538 |
| CCL4 | 3 | 46384204 | A | G | 0.5651 | 0.0184 | 0.1268 | 1.00E-200 | rs113341849 | 14296 | 0.061894507 | 943.092317 |
| CCL4 | 3 | 46459749 | T | C | -0.2294 | 0.0415 | 0.0248 | 3.24E-08 | rs140505982 | 13865 | 0.002198947 | 30.55117958 |
| CCL4 | 4 | 38798935 | T | C | 0.0728 | 0.0143 | 0.2565 | 3.56E-07 | rs5743614 | 12859 | 0.002011449 | 25.91332437 |
| CCL4 | 4 | 53951496 | A | G | 0.0869 | 0.019 | 0.1344 | 4.79E-06 | rs111476793 | 12800 | 0.001631598 | 20.91531873 |
| CCL4 | 4 | 157055604 | A | G | -0.2607 | 0.0552 | 0.0138 | 2.33E-06 | rs78044056 | 13809 | 0.001612652 | 22.30185573 |
| CCL4 | 5 | 11317698 | T | C | 0.0743 | 0.0162 | 0.1598 | 4.51E-06 | rs42279 | 14738 | 0.001425245 | 21.03239159 |
| CCL4 | 5 | 33775793 | T | G | 0.2123 | 0.0455 | 0.0284 | 3.07E-06 | rs112315344 | 14255 | 0.001524921 | 21.76788621 |
| CCL4 | 9 | 105528047 | A | T | 0.085 | 0.0186 | 0.8839 | 4.88E-06 | rs10990301 | 14296 | 0.001458692 | 20.88099557 |
| CCL4 | 10 | 132716137 | A | G | 0.0833 | 0.0178 | 0.1323 | 2.87E-06 | rs56131468 | 14296 | 0.001529575 | 21.89723284 |
| CCL4 | 12 | 52285090 | A | G | 0.1953 | 0.0416 | 0.0228 | 2.67E-06 | rs143960014 | 14257 | 0.001543543 | 22.03722457 |
| CCL4 | 12 | 67722012 | A | G | -0.0635 | 0.0125 | 0.6742 | 3.77E-07 | rs1161092 | 14296 | 0.001801896 | 25.8027897 |
| CCL4 | 16 | 79338459 | T | G | -0.1765 | 0.0374 | 0.9693 | 2.37E-06 | rs72800563 | 14741 | 0.001508564 | 22.2683115 |
| CCL4 | 17 | 34421139 | A | G | -0.0745 | 0.0138 | 0.2416 | 6.72E-08 | rs1634503 | 14295 | 0.002034631 | 29.14027237 |
| CCL4 | 17 | 34819750 | A | G | -0.4104 | 0.0173 | 0.1459 | 2.11E-124 | rs8064426 | 14295 | 0.037876443 | 562.680328 |
| CCL4 | 17 | 34945214 | T | C | 0.2321 | 0.0283 | 0.9406 | 2.38E-16 | rs17692864 | 13662 | 0.004899257 | 67.25333545 |
| CCL4 | 19 | 18917908 | T | C | 0.2797 | 0.0551 | 0.0186 | 3.85E-07 | rs137896358 | 12745 | 0.002017738 | 25.76401708 |
| CCL4 | 21 | 26966560 | A | T | -0.0899 | 0.0196 | 0.8283 | 4.50E-06 | rs4817032 | 10894 | 0.001927445 | 21.03427282 |
| CD244 | 1 | 25261696 | A | G | -0.0559 | 0.0122 | 0.4429 | 4.61E-06 | rs10903115 | 14286 | 0.001467424 | 20.99148438 |
| CD244 | 1 | 44253015 | T | C | 0.0744 | 0.0119 | 0.4677 | 4.05E-10 | rs3828139 | 14286 | 0.002728693 | 39.0832926 |
| CD244 | 1 | 88677329 | A | G | 0.2053 | 0.0411 | 0.0249 | 5.88E-07 | rs147033439 | 14731 | 0.001690935 | 24.94797428 |
| CD244 | 1 | 160773957 | A | G | -0.0624 | 0.0118 | 0.4675 | 1.24E-07 | rs11265488 | 14287 | 0.001953507 | 27.96046339 |
| CD244 | 1 | 160803802 | A | G | 0.2122 | 0.0119 | 0.4066 | 3.99E-71 | rs11265493 | 14287 | 0.02177188 | 317.9333135 |
| CD244 | 2 | 62495209 | A | G | 0.0661 | 0.0117 | 0.4329 | 1.61E-08 | rs4672486 | 14720 | 0.002163629 | 31.91333448 |
| CD244 | 2 | 79554556 | T | C | -0.0589 | 0.0123 | 0.4388 | 1.68E-06 | rs1434219 | 14287 | 0.001602444 | 22.92765123 |
| CD244 | 2 | 111846068 | T | C | 0.0704 | 0.0126 | 0.6994 | 2.31E-08 | rs56272634 | 14729 | 0.002115005 | 31.21370005 |
| CD244 | 4 | 27611759 | C | G | -0.0637 | 0.0139 | 0.2366 | 4.59E-06 | rs1574847 | 14287 | 0.001467812 | 20.99850926 |
| CD244 | 4 | 174530615 | A | G | -0.1804 | 0.0337 | 0.0393 | 8.65E-08 | rs114758826 | 14728 | 0.001941893 | 28.65195664 |
| CD244 | 5 | 96078542 | T | C | 0.2288 | 0.0497 | 0.0184 | 4.15E-06 | rs78142752 | 14734 | 0.00143633 | 21.19045624 |
| CD244 | 6 | 614064 | A | G | -0.1074 | 0.0215 | 0.0794 | 5.87E-07 | rs6928352 | 14731 | 0.001691081 | 24.95012211 |
| CD244 | 8 | 3921805 | A | G | 0.0627 | 0.0134 | 0.6347 | 2.88E-06 | rs2554697 | 11782 | 0.001854813 | 21.89030219 |
| CD244 | 8 | 106570964 | T | G | 0.063 | 0.0138 | 0.248 | 4.99E-06 | rs34826779 | 14287 | 0.001456629 | 20.83829232 |
| CD244 | 9 | 92856642 | T | C | -0.3705 | 0.0763 | 0.9873 | 1.20E-06 | rs10992054 | 12304 | 0.001912712 | 23.575274 |
| CD244 | 11 | 94575608 | A | G | 0.0768 | 0.0161 | 0.8167 | 1.84E-06 | rs11020961 | 14287 | 0.001590151 | 22.75149231 |
| CD244 | 11 | 126335329 | A | G | -0.0702 | 0.0147 | 0.1876 | 1.79E-06 | rs11220506 | 14729 | 0.001545946 | 22.80240103 |
| CD244 | 12 | 111884608 | T | C | 0.116 | 0.0128 | 0.4764 | 1.27E-19 | rs3184504 | 11784 | 0.006921289 | 82.1149672 |
| CD244 | 16 | 48902293 | A | C | -0.2146 | 0.047 | 0.0182 | 4.97E-06 | rs149458216 | 14725 | 0.00141382 | 20.84513576 |
| CD244 | 17 | 7088423 | T | C | -0.0776 | 0.0125 | 0.6405 | 5.37E-10 | rs72837690 | 14287 | 0.002690249 | 38.53386899 |
| CD244 | 22 | 17214005 | A | G | 0.1618 | 0.0348 | 0.9666 | 3.33E-06 | rs139924614 | 14725 | 0.001465906 | 21.61421939 |
| CD40 | 1 | 211450157 | C | G | 0.1978 | 0.0413 | 0.0203 | 1.67E-06 | rs4278412 | 14725 | 0.001555325 | 22.93472198 |
| CD40 | 2 | 122731427 | A | G | 0.109 | 0.0216 | 0.914 | 4.50E-07 | rs138897138 | 14288 | 0.001779101 | 25.46154177 |
| CD40 | 2 | 161368905 | T | C | 0.0541 | 0.0118 | 0.5003 | 4.55E-06 | rs4664334 | 14288 | 0.001468996 | 21.01695139 |
| CD40 | 3 | 3773438 | A | G | 0.0789 | 0.017 | 0.1353 | 3.46E-06 | rs3967170 | 14721 | 0.001461113 | 21.53759253 |
| CD40 | 4 | 7304426 | T | G | 0.3143 | 0.0687 | 0.9875 | 4.76E-06 | rs12500563 | 10795 | 0.001935136 | 20.92641426 |
| CD40 | 4 | 55046724 | A | G | -0.0582 | 0.0125 | 0.4883 | 3.22E-06 | rs9993874 | 12403 | 0.00174478 | 21.67484034 |
| CD40 | 5 | 22137911 | C | G | -0.0662 | 0.0129 | 0.4415 | 2.87E-07 | rs141401004 | 12404 | 0.002118623 | 26.33094996 |
| CD40 | 6 | 141740384 | T | C | -0.3275 | 0.0705 | 0.9887 | 3.39E-06 | rs551896428 | 12778 | 0.001685965 | 21.57627129 |
| CD40 | 7 | 29807677 | T | G | 0.1568 | 0.0335 | 0.0642 | 2.86E-06 | rs200824954 | 10894 | 0.002006978 | 21.90396639 |
| CD40 | 9 | 29426599 | C | G | 0.1458 | 0.0316 | 0.9638 | 3.95E-06 | rs75626299 | 14728 | 0.001443344 | 21.28540428 |
| CD40 | 13 | 45595067 | A | C | 0.064 | 0.012 | 0.4882 | 9.64E-08 | rs9526031 | 14288 | 0.001986837 | 28.44046286 |
| CD40 | 15 | 26829521 | A | G | -0.0562 | 0.0121 | 0.3092 | 3.41E-06 | rs8024256 | 14736 | 0.001461797 | 21.56964231 |
| CD40 | 16 | 84304113 | A | G | -0.0599 | 0.0123 | 0.6433 | 1.12E-06 | rs404842 | 14287 | 0.001657227 | 23.71278818 |
| CD40 | 19 | 57861085 | T | C | 0.0686 | 0.0116 | 0.3648 | 3.34E-09 | rs7250371 | 14722 | 0.002369927 | 34.96819776 |
| CD40 | 20 | 44464356 | T | C | 0.3553 | 0.0437 | 0.0208 | 4.28E-16 | rs117191103 | 14736 | 0.00446585 | 66.09499799 |
| CD40 | 20 | 44680853 | A | G | -0.4185 | 0.0133 | 0.2558 | 1.00E-200 | rs12624433 | 14287 | 0.064810618 | 989.9809616 |
| CD40 | 20 | 44981692 | A | C | -0.1157 | 0.023 | 0.0763 | 4.89E-07 | rs45456397 | 14288 | 0.001767955 | 25.30173193 |
| CD40 | 21 | 18103398 | T | G | 0.1632 | 0.0351 | 0.9648 | 3.33E-06 | rs138739860 | 11979 | 0.001801451 | 21.61491642 |
| CD40 | 22 | 45002809 | A | G | 0.1085 | 0.0205 | 0.8849 | 1.21E-07 | rs12152184 | 12402 | 0.002253617 | 28.00797515 |
| CD5 | 1 | 1103150 | A | G | 0.0695 | 0.0147 | 0.2776 | 2.27E-06 | rs61768480 | 13670 | 0.001632514 | 22.34968442 |
| CD5 | 1 | 179526214 | T | C | 0.1841 | 0.0313 | 0.0399 | 4.06E-09 | rs61747728 | 14287 | 0.002415614 | 34.59060053 |
| CD5 | 2 | 204776176 | C | G | -0.0589 | 0.0122 | 0.4754 | 1.38E-06 | rs13010492 | 13421 | 0.001733694 | 23.30484425 |
| CD5 | 3 | 47239457 | A | G | 0.1833 | 0.0391 | 0.9694 | 2.76E-06 | rs563284470 | 11720 | 0.001871674 | 21.9734018 |
| CD5 | 4 | 77211819 | A | C | -0.0803 | 0.0151 | 0.2321 | 1.05E-07 | rs138861398 | 11967 | 0.002357582 | 28.27512984 |
| CD5 | 4 | 164762615 | A | G | 0.141 | 0.0292 | 0.1033 | 1.37E-06 | rs74874989 | 9398 | 0.002474919 | 23.31202981 |
| CD5 | 5 | 176733341 | A | G | -0.0683 | 0.0131 | 0.7003 | 1.85E-07 | rs4073745 | 14287 | 0.001899032 | 27.17928427 |
| CD5 | 6 | 4714797 | T | C | -0.1014 | 0.0217 | 0.0833 | 2.97E-06 | rs72821405 | 14727 | 0.001480467 | 21.83219788 |
| CD5 | 6 | 32020238 | A | G | 0.0832 | 0.016 | 0.8464 | 1.99E-07 | rs527506034 | 14730 | 0.001832346 | 27.03632858 |
| CD5 | 6 | 32600375 | T | C | 0.0973 | 0.0165 | 0.1469 | 3.70E-09 | rs3104373 | 14735 | 0.00235442 | 34.76953165 |
| CD5 | 7 | 50716017 | T | C | 0.0623 | 0.0124 | 0.6389 | 5.06E-07 | rs2237450 | 14287 | 0.001763701 | 25.23898718 |
| CD5 | 7 | 97499410 | A | C | -0.1134 | 0.0245 | 0.9301 | 3.68E-06 | rs17345759 | 14287 | 0.001497277 | 21.42067443 |
| CD5 | 9 | 27496604 | T | C | 0.1638 | 0.0334 | 0.9589 | 9.38E-07 | rs17769062 | 14287 | 0.001680596 | 24.04772856 |
| CD5 | 9 | 105614669 | A | T | -0.4169 | 0.0806 | 0.9916 | 2.31E-07 | rs192582121 | 11438 | 0.002333614 | 26.74962888 |
| CD5 | 10 | 6251691 | A | G | -0.1261 | 0.0256 | 0.0751 | 8.40E-07 | rs117276991 | 14287 | 0.0016954 | 24.25992436 |
| CD5 | 10 | 71211945 | A | G | -0.0629 | 0.0132 | 0.7492 | 1.89E-06 | rs12416520 | 14709 | 0.001541347 | 22.70358151 |
| CD5 | 10 | 114454187 | A | T | -0.1681 | 0.0352 | 0.0327 | 1.79E-06 | rs60562286 | 14726 | 0.001546298 | 22.80295407 |
| CD5 | 11 | 4281522 | A | C | 0.1465 | 0.0312 | 0.9341 | 2.66E-06 | rs4910962 | 11760 | 0.001871308 | 22.04409101 |
| CD5 | 11 | 60793651 | C | G | 0.1083 | 0.012 | 0.6328 | 1.80E-19 | rs4939490 | 14735 | 0.00549731 | 81.4395696 |
| CD5 | 11 | 60922561 | C | G | 0.1193 | 0.0126 | 0.6395 | 2.85E-21 | rs674379 | 12835 | 0.006936192 | 89.63386393 |
| CD5 | 12 | 31688535 | A | G | 0.0569 | 0.0119 | 0.4361 | 1.74E-06 | rs1259355 | 14287 | 0.0015977 | 22.85966228 |
| CD5 | 12 | 111884608 | T | C | 0.1427 | 0.0128 | 0.4764 | 7.29E-29 | rs3184504 | 11784 | 0.010437072 | 124.2665644 |
| CD5 | 13 | 39003323 | A | G | 0.2374 | 0.0476 | 0.9826 | 6.12E-07 | rs117516652 | 14248 | 0.001742754 | 24.87061687 |
| CD5 | 14 | 93329692 | T | C | -0.0588 | 0.0128 | 0.3206 | 4.35E-06 | rs11622090 | 13236 | 0.001591791 | 21.0993504 |
| CD5 | 18 | 45545720 | A | G | -0.1199 | 0.0187 | 0.8853 | 1.44E-10 | rs7242462 | 14287 | 0.002869236 | 41.10497166 |
| CD5 | 19 | 48833608 | A | G | 0.1471 | 0.0313 | 0.9627 | 2.61E-06 | rs4893 | 14735 | 0.001496704 | 22.08399901 |
| CD6 | 1 | 4327524 | T | C | 0.1766 | 0.0329 | 0.0397 | 7.97E-08 | rs143374617 | 14733 | 0.001951866 | 28.80916316 |
| CD6 | 1 | 95171460 | A | G | -0.0721 | 0.0154 | 0.8286 | 2.84E-06 | rs841332 | 14727 | 0.001486171 | 21.91644472 |
| CD6 | 1 | 194299592 | A | G | -0.1855 | 0.0392 | 0.0301 | 2.22E-06 | rs12074680 | 12404 | 0.001802066 | 22.38956538 |
| CD6 | 2 | 173467755 | T | C | -0.2416 | 0.0517 | 0.017 | 2.97E-06 | rs35086654 | 13800 | 0.001579963 | 21.83483065 |
| CD6 | 2 | 227938476 | A | T | -0.1796 | 0.0376 | 0.97 | 1.78E-06 | rs72969761 | 14710 | 0.001548643 | 22.81276482 |
| CD6 | 4 | 83099601 | A | T | 0.0688 | 0.0129 | 0.6149 | 9.64E-08 | rs74886615 | 12404 | 0.00228792 | 28.43985811 |
| CD6 | 7 | 115590077 | T | C | -0.3481 | 0.0733 | 0.9886 | 2.04E-06 | rs574143589 | 11273 | 0.001996607 | 22.54877952 |
| CD6 | 7 | 153635380 | A | C | 0.0646 | 0.0134 | 0.2505 | 1.43E-06 | rs9691968 | 14735 | 0.001574783 | 23.2378791 |
| CD6 | 8 | 79672562 | A | G | -0.0831 | 0.0169 | 0.8277 | 8.78E-07 | rs115830154 | 12404 | 0.001945455 | 24.17456164 |
| CD6 | 9 | 33117954 | T | C | 0.0955 | 0.0193 | 0.1058 | 7.49E-07 | rs60988380 | 14735 | 0.001658903 | 24.4812266 |
| CD6 | 11 | 60564804 | A | G | -0.0647 | 0.0128 | 0.6131 | 4.31E-07 | rs4939458 | 12791 | 0.001993506 | 25.54587075 |
| CD6 | 11 | 60756356 | T | G | -0.3548 | 0.0213 | 0.0794 | 2.68E-62 | rs12288280 | 14720 | 0.018500785 | 277.4271779 |
| CD6 | 11 | 60760530 | T | C | -0.5066 | 0.0132 | 0.2477 | 1.00E-200 | rs11230553 | 14287 | 0.093460519 | 1472.725167 |
| CD6 | 11 | 61752586 | C | G | 0.0656 | 0.0134 | 0.7298 | 9.80E-07 | rs414633 | 14286 | 0.001674787 | 23.96278426 |
| CD6 | 11 | 134282292 | T | C | 0.2909 | 0.0584 | 0.0166 | 6.32E-07 | rs534268736 | 11760 | 0.002105422 | 24.80777889 |
| CD6 | 12 | 111973358 | A | G | 0.116 | 0.0134 | 0.4779 | 4.86E-18 | rs597808 | 11335 | 0.006567848 | 74.9255166 |
| CD6 | 16 | 86486037 | A | G | -0.1079 | 0.0236 | 0.0691 | 4.83E-06 | rs8051133 | 14729 | 0.001417195 | 20.90065555 |
| CD6 | 22 | 37638221 | C | G | 0.1752 | 0.0376 | 0.9711 | 3.17E-06 | rs35634144 | 14237 | 0.001522693 | 21.70858419 |
| CDCP1 | 1 | 101804329 | T | C | -0.2176 | 0.0471 | 0.9829 | 3.84E-06 | rs61782461 | 14286 | 0.001491822 | 21.34101954 |
| CDCP1 | 1 | 155197602 | C | G | -0.0566 | 0.012 | 0.4028 | 2.40E-06 | rs2990246 | 14286 | 0.001554834 | 22.24382993 |
| CDCP1 | 2 | 148430383 | A | G | -0.1093 | 0.0232 | 0.0652 | 2.46E-06 | rs59872649 | 14734 | 0.001504146 | 22.1924576 |
| CDCP1 | 3 | 43423959 | T | C | 0.0757 | 0.0143 | 0.2607 | 1.20E-07 | rs34027772 | 12403 | 0.002254306 | 28.01880753 |
| CDCP1 | 3 | 45130725 | T | C | -0.1738 | 0.0151 | 0.1811 | 1.18E-30 | rs7618923 | 14286 | 0.009188111 | 132.4600289 |
| CDCP1 | 3 | 45187785 | C | G | 0.303 | 0.0146 | 0.8212 | 1.14E-95 | rs2276862 | 14730 | 0.028409276 | 430.6461551 |
| CDCP1 | 3 | 58453757 | T | C | -0.148 | 0.0312 | 0.0367 | 2.10E-06 | rs35478654 | 14725 | 0.001525794 | 22.49858741 |
| CDCP1 | 4 | 53951496 | A | G | 0.0895 | 0.0182 | 0.1339 | 8.76E-07 | rs111476793 | 12790 | 0.001887176 | 24.17883535 |
| CDCP1 | 5 | 2103391 | C | G | -0.0781 | 0.0156 | 0.8283 | 5.55E-07 | rs10044847 | 14719 | 0.001699948 | 25.06073797 |
| CDCP1 | 5 | 72411335 | A | G | -0.0738 | 0.0159 | 0.8367 | 3.46E-06 | rs6452820 | 14286 | 0.001505752 | 21.54059378 |
| CDCP1 | 6 | 32602396 | T | C | -0.0933 | 0.0118 | 0.6505 | 2.64E-15 | rs9272226 | 14733 | 0.004225413 | 62.50867792 |
| CDCP1 | 6 | 162326838 | A | T | 0.0957 | 0.0197 | 0.0969 | 1.19E-06 | rs118116993 | 14286 | 0.001649164 | 23.59557793 |
| CDCP1 | 7 | 89774204 | A | G | -0.2998 | 0.0599 | 0.0121 | 5.59E-07 | rs573808300 | 11718 | 0.002133186 | 25.04583306 |
| CDCP1 | 8 | 61937553 | T | C | -0.0579 | 0.0119 | 0.6455 | 1.14E-06 | rs6991332 | 14286 | 0.001654373 | 23.67022577 |
| CDCP1 | 9 | 21413803 | C | G | -0.0616 | 0.0114 | 0.5862 | 6.53E-08 | rs10964983 | 14724 | 0.00197909 | 29.19394102 |
| CDCP1 | 11 | 126188405 | A | G | 0.0816 | 0.0116 | 0.4097 | 2.00E-12 | rs672806 | 14286 | 0.003451851 | 49.47702007 |
| CDCP1 | 11 | 126261564 | A | G | 0.1221 | 0.0122 | 0.3187 | 1.40E-23 | rs12290068 | 14726 | 0.006755895 | 100.1503979 |
| CDCP1 | 13 | 84915900 | A | G | 0.0609 | 0.0128 | 0.7179 | 1.96E-06 | rs17078000 | 14286 | 0.001582036 | 22.6336107 |
| CDCP1 | 14 | 59010649 | T | C | -0.0541 | 0.0118 | 0.6294 | 4.55E-06 | rs28535751 | 14733 | 0.001424689 | 21.01704026 |
| CDCP1 | 16 | 46462357 | C | G | 0.3879 | 0.084 | 0.9894 | 3.88E-06 | rs544425471 | 8827 | 0.002410016 | 21.31977292 |
| CDCP1 | 16 | 79183747 | A | T | -0.0658 | 0.0134 | 0.2312 | 9.09E-07 | rs12928188 | 14715 | 0.001635953 | 24.10921995 |
| CDCP1 | 17 | 38720826 | T | C | -0.1323 | 0.0277 | 0.0513 | 1.79E-06 | rs74811341 | 14734 | 0.001545851 | 22.80873476 |
| CDCP1 | 18 | 19991319 | A | C | 0.0737 | 0.0144 | 0.7965 | 3.09E-07 | rs7506429 | 14286 | 0.001830222 | 26.19082551 |
| CDCP1 | 19 | 11270867 | T | C | -0.0619 | 0.0125 | 0.7187 | 7.35E-07 | rs4804148 | 14734 | 0.001661569 | 24.51897533 |
| CDCP1 | 20 | 18761853 | A | G | 0.4557 | 0.0968 | 0.0265 | 2.51E-06 | rs146583535 | 8372 | 0.002640159 | 22.15662365 |
| CDCP1 | 22 | 31852311 | A | G | -0.1938 | 0.0409 | 0.9581 | 2.15E-06 | rs191929998 | 9844 | 0.002275621 | 22.44774318 |
| CSF-1 | 1 | 110474695 | A | C | 0.0775 | 0.0165 | 0.2211 | 2.64E-06 | rs7538029 | 11335 | 0.001942538 | 22.0576317 |
| CSF-1 | 1 | 110503296 | T | C | 0.1684 | 0.0118 | 0.4821 | 3.31E-46 | rs17610659 | 14286 | 0.014056 | 203.6382496 |
| CSF-1 | 1 | 179682087 | A | G | 0.1439 | 0.031 | 0.044 | 3.45E-06 | rs142421172 | 12840 | 0.001675348 | 21.54420872 |
| CSF-1 | 2 | 8775320 | T | C | 0.0944 | 0.0196 | 0.1197 | 1.46E-06 | rs11685487 | 14286 | 0.001621125 | 23.19375373 |
| CSF-1 | 2 | 27764122 | T | C | 0.0827 | 0.0173 | 0.1595 | 1.75E-06 | rs116443177 | 12403 | 0.001839046 | 22.84803086 |
| CSF-1 | 2 | 140484970 | A | G | -0.2277 | 0.0496 | 0.9815 | 4.42E-06 | rs115370595 | 13799 | 0.001524938 | 21.0717089 |
| CSF-1 | 3 | 1448327 | T | G | 0.1366 | 0.0284 | 0.0881 | 1.51E-06 | rs534521503 | 9398 | 0.002455622 | 23.12982176 |
| CSF-1 | 3 | 47239457 | A | G | 0.2087 | 0.0385 | 0.9696 | 5.93E-08 | rs563284470 | 11720 | 0.002500969 | 29.37983288 |
| CSF-1 | 3 | 115295680 | A | G | 0.0778 | 0.0168 | 0.853 | 3.64E-06 | rs76421506 | 14286 | 0.00149892 | 21.44271761 |
| CSF-1 | 3 | 171430935 | T | G | -0.0914 | 0.02 | 0.8992 | 4.88E-06 | rs74849049 | 14286 | 0.00145978 | 20.88197617 |
| CSF-1 | 4 | 13713646 | C | G | -0.1189 | 0.026 | 0.0697 | 4.81E-06 | rs78652121 | 12838 | 0.001626345 | 20.90977456 |
| CSF-1 | 5 | 78775099 | C | G | 0.0583 | 0.0122 | 0.3043 | 1.76E-06 | rs10042665 | 14727 | 0.001548211 | 22.83276279 |
| CSF-1 | 6 | 30075103 | T | G | -0.075 | 0.0152 | 0.8323 | 8.05E-07 | rs2523992 | 14734 | 0.001649672 | 24.34312872 |
| CSF-1 | 12 | 58388232 | C | G | -0.0601 | 0.0124 | 0.6484 | 1.25E-06 | rs1605333 | 13237 | 0.00177152 | 23.48767076 |
| CSF-1 | 14 | 58461604 | T | C | -0.1225 | 0.0265 | 0.9466 | 3.79E-06 | rs17734417 | 14723 | 0.001449286 | 21.36591174 |
| CSF-1 | 14 | 78693608 | A | G | 0.1151 | 0.0239 | 0.936 | 1.47E-06 | rs75869070 | 14715 | 0.001573659 | 23.1897365 |
| CSF-1 | 16 | 60437963 | T | C | -0.199 | 0.0414 | 0.0231 | 1.53E-06 | rs72783071 | 14247 | 0.001619117 | 23.10172979 |
| CSF-1 | 18 | 45546185 | A | G | -0.0872 | 0.0185 | 0.8823 | 2.43E-06 | rs7227917 | 14286 | 0.001552759 | 22.21409929 |
| CSF-1 | 19 | 58875573 | C | G | -0.1989 | 0.0435 | 0.0348 | 4.82E-06 | rs117591817 | 14286 | 0.00146132 | 20.90404098 |
| CST5 | 1 | 102420542 | A | G | -0.1244 | 0.0264 | 0.9481 | 2.45E-06 | rs1536565 | 14735 | 0.001504627 | 22.20107253 |
| CST5 | 1 | 202185979 | A | G | 0.0579 | 0.0114 | 0.547 | 3.80E-07 | rs930735 | 14734 | 0.001747701 | 25.79220485 |
| CST5 | 2 | 62640887 | T | G | 0.0701 | 0.0141 | 0.7748 | 6.64E-07 | rs13397003 | 14732 | 0.001674974 | 24.71376128 |
| CST5 | 2 | 233853187 | A | G | 0.0607 | 0.0126 | 0.2813 | 1.45E-06 | rs72980022 | 14721 | 0.001574037 | 23.20477087 |
| CST5 | 4 | 23899510 | A | G | 0.0545 | 0.0117 | 0.4095 | 3.19E-06 | rs13127297 | 14730 | 0.001470887 | 21.69513264 |
| CST5 | 5 | 59193431 | A | C | 0.0548 | 0.0119 | 0.4071 | 4.12E-06 | rs150547 | 14288 | 0.001482012 | 21.20344355 |
| CST5 | 5 | 96079646 | T | C | 0.3373 | 0.0676 | 0.0111 | 6.05E-07 | rs139918398 | 13457 | 0.001846666 | 24.89285677 |
| CST5 | 5 | 109366574 | T | C | 0.073 | 0.0156 | 0.8152 | 2.88E-06 | rs79359257 | 14288 | 0.001530242 | 21.89453509 |
| CST5 | 5 | 134512655 | T | C | 0.059 | 0.0118 | 0.3955 | 5.73E-07 | rs9327707 | 14710 | 0.001696641 | 24.99660095 |
| CST5 | 6 | 7051402 | A | G | 0.0885 | 0.0191 | 0.8624 | 3.60E-06 | rs3889401 | 11759 | 0.001822457 | 21.46574346 |
| CST5 | 6 | 146809314 | A | G | 0.1194 | 0.0234 | 0.0762 | 3.35E-07 | rs62436191 | 14288 | 0.001818925 | 26.03251594 |
| CST5 | 6 | 168345756 | A | G | 0.0537 | 0.0115 | 0.4261 | 3.02E-06 | rs9455923 | 14734 | 0.001477713 | 21.80187952 |
| CST5 | 8 | 11713852 | A | G | -0.0558 | 0.0121 | 0.6302 | 4.00E-06 | rs17154027 | 14288 | 0.00148621 | 21.26360331 |
| CST5 | 8 | 56143053 | T | C | 0.057 | 0.0122 | 0.6482 | 2.98E-06 | rs4507745 | 13866 | 0.001571794 | 21.82566092 |
| CST5 | 9 | 109490400 | T | C | 0.0558 | 0.0119 | 0.5837 | 2.74E-06 | rs962720 | 14287 | 0.001536617 | 21.9843523 |
| CST5 | 11 | 21963583 | A | G | 0.3276 | 0.0691 | 0.0089 | 2.13E-06 | rs140505821 | 13381 | 0.001676927 | 22.47329613 |
| CST5 | 11 | 34495358 | A | C | -0.094 | 0.0172 | 0.1273 | 4.63E-08 | rs4756151 | 14736 | 0.002022739 | 29.86344227 |
| CST5 | 11 | 34860199 | T | C | 0.0702 | 0.0118 | 0.3671 | 2.70E-09 | rs12294339 | 14726 | 0.002397634 | 35.38760918 |
| CST5 | 12 | 11058117 | T | C | 0.1674 | 0.013 | 0.7421 | 6.07E-38 | rs11054069 | 14724 | 0.011136145 | 165.7926248 |
| CST5 | 12 | 31381343 | T | C | 0.1016 | 0.0213 | 0.0812 | 1.84E-06 | rs141192864 | 14728 | 0.00154246 | 22.74936243 |
| CST5 | 12 | 117050587 | A | G | -0.0574 | 0.0117 | 0.4935 | 9.30E-07 | rs4766797 | 14288 | 0.001681704 | 24.0652992 |
| CST5 | 15 | 63639644 | T | G | 0.079 | 0.0115 | 0.4609 | 6.44E-12 | rs67020211 | 14734 | 0.003192634 | 47.18452056 |
| CST5 | 18 | 3479423 | T | C | -0.0654 | 0.0134 | 0.3077 | 1.06E-06 | rs60586299 | 14288 | 0.001664374 | 23.81689292 |
| CST5 | 18 | 24286681 | T | C | 0.0568 | 0.0119 | 0.6369 | 1.81E-06 | rs470841 | 14736 | 0.001543662 | 22.77947976 |
| CST5 | 19 | 49206145 | C | G | 0.0845 | 0.0115 | 0.4441 | 2.01E-13 | rs516316 | 14734 | 0.003650973 | 53.9832195 |
| CST5 | 20 | 23541754 | T | C | -0.3099 | 0.0383 | 0.968 | 5.90E-16 | rs188169560 | 11979 | 0.00543573 | 65.45956112 |
| CST5 | 20 | 23756613 | A | G | 0.3549 | 0.0117 | 0.3939 | 1.00E-200 | rs4640452 | 14288 | 0.060501341 | 919.9823162 |
| CST5 | 20 | 23900945 | T | C | -0.2278 | 0.018 | 0.8749 | 1.04E-36 | rs1797042 | 14288 | 0.01108536 | 160.1406672 |
| CST5 | 20 | 23929099 | T | C | 0.5656 | 0.0476 | 0.0233 | 1.46E-32 | rs112961631 | 12148 | 0.011488984 | 141.1670664 |
| CST5 | 20 | 24071731 | T | C | -0.2583 | 0.0447 | 0.9784 | 7.54E-09 | rs141179525 | 14735 | 0.002261 | 33.38680148 |
| CST5 | 20 | 24298968 | A | G | 0.2365 | 0.0474 | 0.9818 | 6.06E-07 | rs6083489 | 14288 | 0.001739315 | 24.89114135 |
| CST5 | 20 | 51363052 | A | C | 0.1098 | 0.0237 | 0.0675 | 3.61E-06 | rs697699 | 14288 | 0.001499977 | 21.46086351 |
| CST5 | 21 | 18049996 | T | C | -0.0572 | 0.0119 | 0.6243 | 1.53E-06 | rs7275493 | 14727 | 0.001566401 | 23.10144529 |
| CST5 | 22 | 37630079 | A | G | -0.2516 | 0.0532 | 0.983 | 2.25E-06 | rs77121303 | 13383 | 0.001668474 | 22.36315643 |
| CX3CL1 | 1 | 6532317 | A | G | -0.1881 | 0.0405 | 0.9747 | 3.41E-06 | rs114359340 | 13651 | 0.001577674 | 21.56770386 |
| CX3CL1 | 1 | 172099857 | A | G | -0.1436 | 0.0304 | 0.0402 | 2.32E-06 | rs77915710 | 14742 | 0.001511292 | 22.31016536 |
| CX3CL1 | 2 | 44117788 | C | G | -0.1191 | 0.0248 | 0.9355 | 1.57E-06 | rs111472651 | 14728 | 0.001563496 | 23.06009977 |
| CX3CL1 | 2 | 113835522 | A | G | -0.0675 | 0.0126 | 0.5568 | 8.45E-08 | rs11682107 | 12412 | 0.002306862 | 28.6943552 |
| CX3CL1 | 3 | 1260482 | C | G | -0.0569 | 0.012 | 0.3525 | 2.12E-06 | rs1976172 | 14732 | 0.001523835 | 22.48035046 |
| CX3CL1 | 3 | 39307162 | A | G | 0.0941 | 0.0154 | 0.1671 | 9.94E-10 | rs3732378 | 14740 | 0.00252663 | 37.33179513 |
| CX3CL1 | 3 | 70136592 | T | G | 0.0633 | 0.0122 | 0.3327 | 2.12E-07 | rs35026817 | 14740 | 0.001823047 | 26.91713467 |
| CX3CL1 | 4 | 179539497 | A | G | 0.1479 | 0.0301 | 0.9343 | 8.94E-07 | rs980364 | 9902 | 0.002432332 | 24.13879739 |
| CX3CL1 | 4 | 187139939 | A | G | -0.0582 | 0.0114 | 0.4914 | 3.30E-07 | rs12331618 | 14729 | 0.001766425 | 26.06017281 |
| CX3CL1 | 5 | 120396066 | T | C | -0.0903 | 0.0193 | 0.89 | 2.89E-06 | rs13167439 | 14295 | 0.001529016 | 21.88769945 |
| CX3CL1 | 5 | 176839890 | T | G | -0.0681 | 0.0128 | 0.274 | 1.04E-07 | rs2731674 | 14740 | 0.001916654 | 28.30188443 |
| CX3CL1 | 6 | 31351764 | T | C | -0.0589 | 0.0117 | 0.6177 | 4.80E-07 | rs2442752 | 14743 | 0.001716039 | 25.33961119 |
| CX3CL1 | 6 | 32418018 | T | C | -0.0811 | 0.012 | 0.651 | 1.40E-11 | rs6937696 | 14742 | 0.003088726 | 45.66887285 |
| CX3CL1 | 7 | 30524015 | A | T | 0.0597 | 0.012 | 0.4243 | 6.52E-07 | rs2736723 | 14295 | 0.001728426 | 24.74716216 |
| CX3CL1 | 8 | 26741279 | A | G | 0.1968 | 0.0424 | 0.9744 | 3.46E-06 | rs56397903 | 14743 | 0.001459145 | 21.54068727 |
| CX3CL1 | 9 | 88885541 | A | C | -0.2404 | 0.0512 | 0.981 | 2.66E-06 | rs571946532 | 11768 | 0.001869879 | 22.04221271 |
| CX3CL1 | 9 | 136155000 | T | C | -0.1145 | 0.0166 | 0.1884 | 5.29E-12 | rs635634 | 11792 | 0.00401845 | 47.56868347 |
| CX3CL1 | 12 | 41381284 | A | C | 0.0563 | 0.012 | 0.6601 | 2.71E-06 | rs712137 | 14737 | 0.00149141 | 22.00874884 |
| CX3CL1 | 12 | 79905558 | A | C | 0.0792 | 0.0158 | 0.1687 | 5.37E-07 | rs10778675 | 14295 | 0.001754645 | 25.12322705 |
| CX3CL1 | 14 | 85801666 | T | G | -0.2257 | 0.0491 | 0.979 | 4.29E-06 | rs530057572 | 12127 | 0.001739365 | 21.12654619 |
| CX3CL1 | 15 | 85657494 | A | G | -0.1996 | 0.0432 | 0.0224 | 3.83E-06 | rs117698194 | 13859 | 0.001537989 | 21.34474164 |
| CX3CL1 | 16 | 57167230 | A | G | -0.1511 | 0.027 | 0.9463 | 2.19E-08 | rs8052631 | 14295 | 0.002186084 | 31.31415049 |
| CX3CL1 | 16 | 57412802 | C | G | 0.2041 | 0.0118 | 0.424 | 4.99E-67 | rs671623 | 14295 | 0.020499464 | 299.1308664 |
| CX3CL1 | 16 | 57508595 | T | C | 0.1129 | 0.0244 | 0.9372 | 3.71E-06 | rs55896747 | 14734 | 0.001450965 | 21.40667797 |
| CX3CL1 | 20 | 52569781 | C | G | 0.2442 | 0.0529 | 0.9812 | 3.91E-06 | rs73137770 | 13808 | 0.001540918 | 21.30674292 |
| CXCL1 | 1 | 159176831 | T | C | 0.0661 | 0.0119 | 0.3809 | 2.78E-08 | rs863004 | 14722 | 0.00209138 | 30.84963236 |
| CXCL1 | 4 | 59689961 | A | G | -0.0538 | 0.0117 | 0.5637 | 4.26E-06 | rs2122155 | 14717 | 0.001434663 | 21.14140298 |
| CXCL1 | 4 | 74717663 | T | C | 0.5003 | 0.0824 | 0.0138 | 1.27E-09 | rs565208061 | 8911 | 0.004119905 | 36.85607624 |
| CXCL1 | 4 | 74738469 | T | C | -0.3134 | 0.0134 | 0.7638 | 5.65E-121 | rs1366946 | 14730 | 0.035805544 | 546.9270662 |
| CXCL1 | 4 | 84005961 | T | C | -0.186 | 0.0407 | 0.9588 | 4.88E-06 | rs62311721 | 14288 | 0.001459591 | 20.88220112 |
| CXCL1 | 6 | 54641812 | A | G | -0.1047 | 0.0206 | 0.8675 | 3.72E-07 | rs77914035 | 10893 | 0.002365826 | 25.8273101 |
| CXCL1 | 9 | 4396102 | C | G | 0.0822 | 0.0179 | 0.1691 | 4.39E-06 | rs67797811 | 14288 | 0.001473756 | 21.085154 |
| CXCL1 | 10 | 65297720 | A | C | 0.0648 | 0.0126 | 0.321 | 2.71E-07 | rs12770839 | 14724 | 0.001793097 | 26.44538696 |
| CXCL1 | 11 | 20486401 | A | G | 0.123 | 0.0267 | 0.067 | 4.09E-06 | rs10734292 | 11776 | 0.001798904 | 21.21846363 |
| CXCL1 | 13 | 37854253 | T | C | -0.365 | 0.0779 | 0.0146 | 2.79E-06 | rs4474574 | 9555 | 0.002292363 | 21.94926086 |
| CXCL1 | 15 | 81240669 | A | G | -0.1443 | 0.0312 | 0.0405 | 3.75E-06 | rs2280441 | 14735 | 0.001449584 | 21.38772162 |
| CXCL1 | 19 | 14808453 | A | G | 0.0583 | 0.0127 | 0.3161 | 4.42E-06 | rs11880837 | 14288 | 0.001472713 | 21.07021038 |
| CXCL1 | 21 | 39102421 | C | G | -0.0564 | 0.012 | 0.3876 | 2.60E-06 | rs2835916 | 14735 | 0.001496908 | 22.0870017 |
| CXCL1 | 22 | 16564036 | A | G | 0.0976 | 0.0208 | 0.3429 | 2.70E-06 | rs188111670 | 7743 | 0.002835506 | 22.01206434 |
| CXCL10 | 1 | 44566391 | A | G | -0.1609 | 0.0336 | 0.9671 | 1.68E-06 | rs112202639 | 14744 | 0.001552899 | 22.92844585 |
| CXCL10 | 2 | 3891773 | A | G | 0.0592 | 0.0127 | 0.7042 | 3.14E-06 | rs1563171 | 14740 | 0.001471969 | 21.72586318 |
| CXCL10 | 2 | 14400474 | T | C | 0.0536 | 0.0115 | 0.4864 | 3.15E-06 | rs12476448 | 14737 | 0.001471923 | 21.72075692 |
| CXCL10 | 3 | 54104178 | T | G | -0.0879 | 0.0182 | 0.1209 | 1.37E-06 | rs12629593 | 14744 | 0.001579549 | 23.3225514 |
| CXCL10 | 4 | 76808216 | T | C | -0.6096 | 0.0619 | 0.9892 | 6.98E-23 | rs72651343 | 14257 | 0.006756723 | 96.97229872 |
| CXCL10 | 4 | 76910673 | T | C | -0.5186 | 0.042 | 0.9732 | 5.02E-35 | rs115140093 | 14744 | 0.010234892 | 152.4430147 |
| CXCL10 | 4 | 77175245 | T | C | 0.0977 | 0.0136 | 0.246 | 6.78E-13 | rs12646113 | 14743 | 0.003488252 | 51.60031958 |
| CXCL10 | 4 | 112904535 | A | G | 0.1089 | 0.0209 | 0.0979 | 1.88E-07 | rs72682331 | 14731 | 0.001839633 | 27.14589844 |
| CXCL10 | 6 | 31377978 | T | C | 0.1095 | 0.0196 | 0.1048 | 2.31E-08 | rs2523495 | 14743 | 0.002112573 | 31.20737045 |
| CXCL10 | 6 | 32516855 | T | C | -0.2991 | 0.0606 | 0.9813 | 7.99E-07 | rs71534595 | 11719 | 0.002074413 | 24.35641994 |
| CXCL10 | 6 | 88557407 | A | G | -0.0582 | 0.0121 | 0.6254 | 1.51E-06 | rs12174864 | 14295 | 0.001615804 | 23.13206813 |
| CXCL10 | 7 | 3425301 | T | C | -0.1765 | 0.0375 | 0.0284 | 2.52E-06 | rs12155428 | 14733 | 0.001501354 | 22.14970389 |
| CXCL10 | 8 | 62003730 | A | G | -0.0789 | 0.0164 | 0.2555 | 1.50E-06 | rs2349689 | 14296 | 0.001616401 | 23.14224828 |
| CXCL10 | 9 | 4150061 | C | G | -0.2858 | 0.062 | 0.012 | 4.03E-06 | rs143796249 | 14296 | 0.001484163 | 21.24615317 |
| CXCL10 | 9 | 84196490 | T | C | -0.0548 | 0.0119 | 0.4567 | 4.12E-06 | rs10481754 | 14296 | 0.001481184 | 21.20344521 |
| CXCL10 | 10 | 1845059 | T | C | -0.0567 | 0.0119 | 0.5587 | 1.89E-06 | rs4367871 | 14296 | 0.001585508 | 22.69924609 |
| CXCL10 | 10 | 78705575 | A | C | -0.0698 | 0.015 | 0.2969 | 3.27E-06 | rs12779465 | 11768 | 0.001836654 | 21.64983104 |
| CXCL10 | 11 | 73731422 | A | G | 0.1175 | 0.025 | 0.929 | 2.60E-06 | rs55732300 | 14730 | 0.001497415 | 22.08700068 |
| CXCL10 | 12 | 68597086 | A | G | -0.06 | 0.013 | 0.7036 | 3.92E-06 | rs741344 | 14296 | 0.001487834 | 21.29879505 |
| CXCL10 | 12 | 111884608 | T | C | 0.1138 | 0.0131 | 0.4756 | 3.72E-18 | rs3184504 | 11793 | 0.006358394 | 75.45156872 |
| CXCL10 | 15 | 80065337 | A | G | -0.0546 | 0.0118 | 0.5648 | 3.71E-06 | rs1077965 | 14731 | 0.001451304 | 21.40732012 |
| CXCL10 | 19 | 10427721 | A | T | -0.1358 | 0.0294 | 0.0495 | 3.86E-06 | rs74956615 | 13671 | 0.001558215 | 21.33247961 |
| CXCL10 | 19 | 11270867 | T | C | -0.0629 | 0.013 | 0.7227 | 1.31E-06 | rs4804148 | 14744 | 0.001585296 | 23.40753443 |
| CXCL10 | 22 | 50774821 | T | C | -0.1841 | 0.0376 | 0.9688 | 9.77E-07 | rs150519056 | 13661 | 0.001751814 | 23.97001473 |
| CXCL11 | 1 | 26395741 | A | G | -0.0777 | 0.0165 | 0.1703 | 2.49E-06 | rs60141220 | 13221 | 0.001674488 | 22.1721826 |
| CXCL11 | 3 | 188015332 | C | G | 0.2674 | 0.0518 | 0.9763 | 2.44E-07 | rs62291421 | 12305 | 0.002160937 | 26.64358695 |
| CXCL11 | 4 | 76916146 | A | G | -0.1724 | 0.0118 | 0.6041 | 2.42E-48 | rs6827617 | 14718 | 0.014295795 | 213.4280463 |
| CXCL11 | 4 | 77130802 | A | G | 0.1821 | 0.0378 | 0.0278 | 1.45E-06 | rs59148364 | 14721 | 0.001574037 | 23.20477087 |
| CXCL11 | 4 | 77374393 | T | C | -0.1975 | 0.0427 | 0.0216 | 3.74E-06 | rs116470923 | 14736 | 0.001449669 | 21.39042938 |
| CXCL11 | 4 | 134362360 | T | C | -0.0976 | 0.0209 | 0.0892 | 3.01E-06 | rs112884138 | 14728 | 0.001478498 | 21.80459798 |
| CXCL11 | 5 | 18009856 | A | G | 0.1535 | 0.0326 | 0.9608 | 2.49E-06 | rs72747175 | 14730 | 0.001502885 | 22.16779967 |
| CXCL11 | 6 | 32011678 | A | G | -0.2236 | 0.047 | 0.9724 | 1.96E-06 | rs2894233 | 11917 | 0.001895644 | 22.62950165 |
| CXCL11 | 6 | 89498971 | A | G | -0.0973 | 0.0185 | 0.1651 | 1.44E-07 | rs72925566 | 11337 | 0.002434029 | 27.65703387 |
| CXCL11 | 6 | 154177484 | T | C | -0.0773 | 0.0164 | 0.165 | 2.44E-06 | rs7750544 | 13644 | 0.001625635 | 22.21302095 |
| CXCL11 | 7 | 101594247 | T | C | 0.5352 | 0.0705 | 0.0084 | 3.16E-14 | rs75612655 | 12935 | 0.004435646 | 57.62179991 |
| CXCL11 | 7 | 157911633 | A | C | -0.1445 | 0.0314 | 0.951 | 4.19E-06 | rs111787182 | 13224 | 0.00159889 | 21.17438037 |
| CXCL11 | 8 | 70982905 | T | C | 0.1082 | 0.0214 | 0.9152 | 4.28E-07 | rs78632565 | 14722 | 0.001733432 | 25.56041916 |
| CXCL11 | 8 | 96176796 | T | C | 0.1175 | 0.025 | 0.9321 | 2.60E-06 | rs7009937 | 14288 | 0.001543666 | 22.08690789 |
| CXCL11 | 10 | 17590681 | T | C | 0.0901 | 0.019 | 0.1188 | 2.12E-06 | rs4748380 | 14732 | 0.001524117 | 22.48450944 |
| CXCL11 | 10 | 64948684 | T | C | -0.0815 | 0.0127 | 0.6875 | 1.39E-10 | rs10733789 | 14287 | 0.002874198 | 41.1762674 |
| CXCL11 | 10 | 104343428 | A | C | -0.0646 | 0.0124 | 0.3172 | 1.89E-07 | rs7475335 | 14735 | 0.001838537 | 27.13705497 |
| CXCL11 | 11 | 22351553 | A | G | -0.1162 | 0.025 | 0.9044 | 3.35E-06 | rs111848253 | 11538 | 0.001868914 | 21.60015917 |
| CXCL11 | 11 | 83554112 | A | G | 0.0609 | 0.0121 | 0.6028 | 4.83E-07 | rs10898158 | 14288 | 0.001769796 | 25.32812547 |
| CXCL11 | 12 | 111884608 | T | C | 0.1236 | 0.0132 | 0.4764 | 7.70E-21 | rs3184504 | 11785 | 0.007384828 | 87.66280641 |
| CXCL11 | 14 | 30090297 | A | C | 0.1254 | 0.0274 | 0.1092 | 4.72E-06 | rs529862022 | 10894 | 0.001918988 | 20.94180971 |
| CXCL11 | 14 | 50775476 | A | G | 0.0571 | 0.012 | 0.4282 | 1.95E-06 | rs12433317 | 14288 | 0.001582161 | 22.63856678 |
| CXCL11 | 17 | 34335694 | T | C | -0.0882 | 0.0182 | 0.1205 | 1.26E-06 | rs7222922 | 14726 | 0.001592273 | 23.48201748 |
| CXCL11 | 20 | 4795382 | A | G | -0.0599 | 0.0131 | 0.6525 | 4.82E-06 | rs2245786 | 14721 | 0.001418265 | 20.90509021 |
| CXCL11 | 20 | 17839484 | A | G | -0.3323 | 0.0684 | 0.0117 | 1.18E-06 | rs191536201 | 11194 | 0.002104013 | 23.59776534 |
| CXCL5 | 1 | 211477063 | T | C | 0.2082 | 0.042 | 0.0209 | 7.15E-07 | rs4279906 | 14717 | 0.001666936 | 24.56992587 |
| CXCL5 | 3 | 56874033 | A | G | -0.0768 | 0.0137 | 0.7593 | 2.07E-08 | rs7636889 | 14733 | 0.002128456 | 31.42116957 |
| CXCL5 | 3 | 183850210 | A | G | 0.1844 | 0.0377 | 0.0265 | 1.00E-06 | rs146553494 | 14733 | 0.001621225 | 23.92104641 |
| CXCL5 | 4 | 6891435 | A | G | 0.0769 | 0.0153 | 0.1845 | 5.00E-07 | rs11734099 | 14731 | 0.001711959 | 25.25869162 |
| CXCL5 | 4 | 74863997 | T | C | 0.5063 | 0.0181 | 0.1127 | 3.52E-172 | rs425535 | 14731 | 0.050437112 | 782.3475695 |
| CXCL5 | 4 | 74880852 | T | G | -0.1721 | 0.0276 | 0.0605 | 4.50E-10 | rs79649467 | 14288 | 0.002713888 | 38.87610807 |
| CXCL5 | 6 | 54641812 | A | G | -0.1174 | 0.0206 | 0.8675 | 1.20E-08 | rs77914035 | 10893 | 0.00297277 | 32.47296971 |
| CXCL5 | 6 | 76351999 | C | G | 0.0631 | 0.013 | 0.2784 | 1.21E-06 | rs2647400 | 14734 | 0.001596458 | 23.55662446 |
| CXCL5 | 8 | 106581528 | A | T | -0.1058 | 0.0135 | 0.7312 | 4.61E-15 | rs6993770 | 14288 | 0.004280253 | 61.41055221 |
| CXCL5 | 8 | 144554731 | T | C | 0.0675 | 0.0147 | 0.2492 | 4.39E-06 | rs2004100 | 13224 | 0.001591909 | 21.0817757 |
| CXCL5 | 9 | 100684757 | A | G | -0.0619 | 0.0121 | 0.6436 | 3.13E-07 | rs3183927 | 14725 | 0.001774124 | 26.1668573 |
| CXCL5 | 9 | 136939992 | A | C | -0.1132 | 0.0156 | 0.3353 | 3.97E-13 | rs10821552 | 9841 | 0.005322147 | 52.64478856 |
| CXCL5 | 10 | 65077994 | C | G | -0.1734 | 0.0117 | 0.5834 | 1.08E-49 | rs7090111 | 14735 | 0.014687581 | 219.6177872 |
| CXCL5 | 13 | 53109423 | A | G | -0.1474 | 0.0322 | 0.9544 | 4.70E-06 | rs140828666 | 12401 | 0.001686915 | 20.95140616 |
| CXCL5 | 16 | 88582345 | A | G | -0.19 | 0.0385 | 0.0309 | 8.01E-07 | rs59312158 | 13672 | 0.001778201 | 24.35130318 |
| CXCL5 | 19 | 14764810 | A | G | -0.0601 | 0.0127 | 0.2925 | 2.22E-06 | rs10403201 | 14730 | 0.001518025 | 22.39146612 |
| CXCL6 | 1 | 159175354 | A | G | 0.0816 | 0.0115 | 0.5554 | 1.29E-12 | rs12075 | 14741 | 0.003403901 | 50.34144872 |
| CXCL6 | 1 | 211457870 | T | G | -0.215 | 0.0457 | 0.9774 | 2.54E-06 | rs4951518 | 11323 | 0.0019509 | 22.12930644 |
| CXCL6 | 1 | 222149663 | T | C | -0.1603 | 0.0351 | 0.039 | 4.95E-06 | rs184103539 | 12841 | 0.00162162 | 20.85379811 |
| CXCL6 | 4 | 74594043 | A | G | -0.392 | 0.0119 | 0.594 | 1.00E-200 | rs10031141 | 14296 | 0.070548896 | 1084.9693 |
| CXCL6 | 4 | 74745550 | A | T | 0.1179 | 0.0138 | 0.2293 | 1.30E-17 | rs10021230 | 14744 | 0.00492617 | 72.98111968 |
| CXCL6 | 6 | 154000019 | T | C | -0.0919 | 0.0193 | 0.1328 | 1.92E-06 | rs9371716 | 12412 | 0.0018234 | 22.66973374 |
| CXCL6 | 8 | 93838957 | A | G | -0.3831 | 0.0799 | 0.0074 | 1.63E-06 | rs182381042 | 12935 | 0.001774161 | 22.98600992 |
| CXCL6 | 9 | 86683575 | T | G | 0.0625 | 0.0134 | 0.5188 | 3.10E-06 | rs4877818 | 11538 | 0.001881923 | 21.75079578 |
| CXCL6 | 10 | 35485924 | A | T | 0.3432 | 0.0692 | 0.9894 | 7.07E-07 | rs574432935 | 12778 | 0.001921252 | 24.59316303 |
| CXCL6 | 12 | 111884608 | T | C | 0.0679 | 0.0131 | 0.4766 | 2.18E-07 | rs3184504 | 11793 | 0.002272921 | 26.86106935 |
| CXCL6 | 14 | 89402542 | T | G | 0.0605 | 0.0131 | 0.715 | 3.87E-06 | rs34080302 | 14296 | 0.001489725 | 21.32590137 |
| CXCL6 | 16 | 2222286 | T | C | 0.1285 | 0.0272 | 0.0649 | 2.31E-06 | rs11547311 | 13232 | 0.00168388 | 22.31530357 |
| CXCL6 | 21 | 39099887 | C | G | 0.1897 | 0.0415 | 0.0242 | 4.85E-06 | rs117109857 | 14743 | 0.001415264 | 20.89197748 |
| CXCL6 | 22 | 35739167 | A | C | -0.3485 | 0.0719 | 0.9837 | 1.25E-06 | rs377588320 | 10271 | 0.002282143 | 23.48892865 |
| CXCL9 | 1 | 3823464 | T | G | 0.6177 | 0.1287 | 0.0057 | 1.59E-06 | rs192119373 | 8829 | 0.002602286 | 23.03030654 |
| CXCL9 | 1 | 161608256 | T | C | -0.0645 | 0.0137 | 0.4962 | 2.50E-06 | rs4047522 | 11760 | 0.001881279 | 22.16176927 |
| CXCL9 | 2 | 86977227 | T | G | -0.2245 | 0.0488 | 0.981 | 4.22E-06 | rs114033894 | 14287 | 0.00147914 | 21.160808 |
| CXCL9 | 2 | 204754353 | T | C | 0.057 | 0.0118 | 0.5214 | 1.36E-06 | rs7600322 | 13849 | 0.001682039 | 23.33044238 |
| CXCL9 | 2 | 242665455 | A | G | 0.0915 | 0.02 | 0.1125 | 4.76E-06 | rs35435997 | 12791 | 0.001633682 | 20.92735229 |
| CXCL9 | 3 | 151541803 | A | G | -0.0834 | 0.0176 | 0.1182 | 2.15E-06 | rs62272916 | 14710 | 0.001524164 | 22.45162161 |
| CXCL9 | 4 | 76930776 | A | C | -0.1419 | 0.0128 | 0.2629 | 1.47E-28 | rs4241577 | 14724 | 0.008277689 | 122.8813167 |
| CXCL9 | 4 | 160574480 | T | C | 0.1546 | 0.0332 | 0.0336 | 3.21E-06 | rs80348644 | 14734 | 0.001469547 | 21.681227 |
| CXCL9 | 5 | 19287867 | T | C | 0.0728 | 0.0154 | 0.1625 | 2.28E-06 | rs145607633 | 14287 | 0.001561714 | 22.34397912 |
| CXCL9 | 6 | 31269173 | A | G | -0.0605 | 0.0115 | 0.4075 | 1.43E-07 | rs9366778 | 14735 | 0.001874778 | 27.67299198 |
| CXCL9 | 6 | 31423412 | A | G | -0.1603 | 0.0342 | 0.0378 | 2.77E-06 | rs181816009 | 11985 | 0.001829707 | 21.96556373 |
| CXCL9 | 6 | 161088918 | A | C | -0.0805 | 0.0144 | 0.1958 | 2.27E-08 | rs783149 | 14287 | 0.002182613 | 31.24683086 |
| CXCL9 | 6 | 161256529 | A | G | -0.1452 | 0.0197 | 0.098 | 1.70E-13 | rs12191307 | 14287 | 0.003788013 | 54.31752593 |
| CXCL9 | 7 | 29049949 | A | G | 0.0562 | 0.0119 | 0.6566 | 2.33E-06 | rs656739 | 14735 | 0.001511373 | 22.30076478 |
| CXCL9 | 7 | 48859798 | T | C | 0.2705 | 0.0551 | 0.9851 | 9.14E-07 | rs142119726 | 13800 | 0.00174339 | 24.09730061 |
| CXCL9 | 10 | 107966626 | A | G | -0.0758 | 0.0158 | 0.1611 | 1.61E-06 | rs61875680 | 14287 | 0.001608363 | 23.0124807 |
| CXCL9 | 12 | 111884608 | T | C | 0.1008 | 0.013 | 0.4744 | 8.92E-15 | rs3184504 | 11784 | 0.005076115 | 60.11192615 |
| CXCL9 | 12 | 129186447 | T | C | -0.0675 | 0.0146 | 0.5684 | 3.78E-06 | rs10744384 | 10893 | 0.001958407 | 21.37086439 |
| CXCL9 | 14 | 74739091 | A | T | -0.0574 | 0.0115 | 0.5236 | 6.00E-07 | rs7149776 | 14286 | 0.001740848 | 24.90963133 |
| CXCL9 | 16 | 1803589 | T | C | 0.1861 | 0.0385 | 0.028 | 1.34E-06 | rs182152471 | 13667 | 0.001706696 | 23.36187677 |
| CXCL9 | 16 | 79431853 | C | G | -0.157 | 0.0343 | 0.9683 | 4.71E-06 | rs4888966 | 14287 | 0.001464312 | 20.94837138 |
| CXCL9 | 19 | 10427721 | A | T | -0.1309 | 0.0286 | 0.049 | 4.72E-06 | rs74956615 | 13662 | 0.001530973 | 20.94515821 |
| CXCL9 | 20 | 2538467 | A | C | 0.2792 | 0.059 | 0.0133 | 2.22E-06 | rs73606147 | 13379 | 0.001671001 | 22.39040133 |
| CXCL9 | 20 | 20119931 | A | C | -0.115 | 0.0244 | 0.9336 | 2.44E-06 | rs62200304 | 14287 | 0.001552388 | 22.21034108 |
| CXCL9 | 21 | 18734554 | A | G | 0.1821 | 0.0391 | 0.9758 | 3.20E-06 | rs73194812 | 14730 | 0.001470363 | 21.6873958 |
| CXCL9 | 21 | 45024252 | T | C | -0.0588 | 0.0126 | 0.5804 | 3.06E-06 | rs73367822 | 11760 | 0.001848429 | 21.77407407 |
| DNER | 2 | 41864408 | T | C | -0.0591 | 0.0125 | 0.4361 | 2.27E-06 | rs10191831 | 12403 | 0.001799062 | 22.35037939 |
| DNER | 2 | 230256586 | A | G | 0.1016 | 0.0117 | 0.5359 | 3.83E-18 | rs207671 | 14287 | 0.005250352 | 75.39714348 |
| DNER | 2 | 230309360 | T | G | 0.132 | 0.0132 | 0.7027 | 1.52E-23 | rs35032874 | 14287 | 0.006950719 | 99.98600126 |
| DNER | 2 | 230596917 | A | T | 0.213 | 0.0123 | 0.6507 | 3.50E-67 | rs62193248 | 14287 | 0.020558269 | 299.8390436 |
| DNER | 3 | 139639117 | T | C | -0.0652 | 0.0142 | 0.7033 | 4.40E-06 | rs9289590 | 12404 | 0.001696755 | 21.07892566 |
| DNER | 4 | 103188709 | T | C | 0.1066 | 0.0233 | 0.0697 | 4.76E-06 | rs13107325 | 14732 | 0.00141881 | 20.92876512 |
| DNER | 7 | 152385669 | C | G | -0.1281 | 0.0274 | 0.942 | 2.94E-06 | rs117343254 | 14287 | 0.001527539 | 21.85427149 |
| DNER | 11 | 119661317 | C | G | 0.0808 | 0.0175 | 0.1236 | 3.89E-06 | rs10892466 | 14732 | 0.001444964 | 21.31511405 |
| DNER | 12 | 31458615 | T | C | -0.2481 | 0.0537 | 0.0138 | 3.84E-06 | rs116179073 | 13800 | 0.001544382 | 21.34233887 |
| DNER | 14 | 69282887 | T | C | 0.0528 | 0.0112 | 0.4849 | 2.43E-06 | rs194746 | 14723 | 0.001507233 | 22.22147078 |
| DNER | 14 | 95752666 | T | C | 0.0879 | 0.0186 | 0.1139 | 2.29E-06 | rs75685422 | 14287 | 0.001560747 | 22.33012024 |
| DNER | 17 | 47247257 | T | C | 0.0918 | 0.0184 | 0.1074 | 6.07E-07 | rs28689968 | 14733 | 0.001686652 | 24.88804349 |
| DNER | 18 | 3722038 | A | G | -0.0664 | 0.0142 | 0.2533 | 2.92E-06 | rs1133851 | 14286 | 0.001528216 | 21.86244177 |
| DNER | 21 | 28101979 | T | G | 0.0718 | 0.0152 | 0.1718 | 2.32E-06 | rs9967959 | 14731 | 0.001512419 | 22.3101631 |
| DNER | 21 | 42536246 | C | G | 0.0757 | 0.0129 | 0.289 | 4.41E-09 | rs6517655 | 14287 | 0.002404505 | 34.43115079 |
| DNER | 21 | 42619544 | A | C | 0.0576 | 0.0118 | 0.3578 | 1.05E-06 | rs2837988 | 14733 | 0.001614686 | 23.82440114 |
| EN-RAGE | 1 | 153337943 | A | G | -0.1726 | 0.0137 | 0.2623 | 2.15E-36 | rs3014874 | 14294 | 0.010982236 | 158.7010054 |
| EN-RAGE | 1 | 153390202 | T | G | 0.1501 | 0.0194 | 0.1069 | 1.02E-14 | rs61803119 | 14295 | 0.004170219 | 59.85454843 |
| EN-RAGE | 1 | 245480237 | C | G | -0.1188 | 0.0258 | 0.0622 | 4.13E-06 | rs59538998 | 14295 | 0.001481036 | 21.19984587 |
| EN-RAGE | 2 | 125135589 | T | C | -0.0622 | 0.0133 | 0.7266 | 2.92E-06 | rs13384799 | 14295 | 0.001527669 | 21.86838552 |
| EN-RAGE | 3 | 152573197 | T | C | -0.0936 | 0.0203 | 0.0955 | 4.01E-06 | rs56268787 | 14737 | 0.001440537 | 21.25693665 |
| EN-RAGE | 3 | 174824333 | A | C | 0.194 | 0.0423 | 0.0217 | 4.51E-06 | rs150015576 | 14740 | 0.001424971 | 21.03118743 |
| EN-RAGE | 4 | 12920594 | T | C | -0.0604 | 0.0119 | 0.613 | 3.86E-07 | rs2056031 | 14739 | 0.001744832 | 25.75852669 |
| EN-RAGE | 7 | 75133433 | A | C | 0.3059 | 0.0665 | 0.983 | 4.22E-06 | rs191808657 | 12412 | 0.0017019 | 21.1565904 |
| EN-RAGE | 8 | 123985708 | A | G | 0.0555 | 0.0118 | 0.5633 | 2.56E-06 | rs3802266 | 14740 | 0.001498557 | 22.11887429 |
| EN-RAGE | 11 | 31879143 | A | G | -0.2529 | 0.0534 | 0.0156 | 2.18E-06 | rs78800546 | 14295 | 0.001566571 | 22.42613224 |
| EN-RAGE | 12 | 96571503 | T | C | 0.1884 | 0.0407 | 0.0246 | 3.67E-06 | rs112956934 | 14737 | 0.001451887 | 21.42466476 |
| EN-RAGE | 14 | 59990514 | T | C | -0.1396 | 0.0293 | 0.9492 | 1.89E-06 | rs112988802 | 12851 | 0.001763324 | 22.69697616 |
| EN-RAGE | 16 | 4602209 | A | G | 0.1806 | 0.0345 | 0.0379 | 1.65E-07 | rs147302029 | 13649 | 0.002003666 | 27.39893358 |
| EN-RAGE | 19 | 4247567 | C | G | 0.0865 | 0.0183 | 0.191 | 2.28E-06 | rs138439507 | 11537 | 0.001932844 | 22.33853777 |
| EN-RAGE | 20 | 43028037 | A | G | -0.0583 | 0.0123 | 0.3511 | 2.14E-06 | rs2425640 | 14741 | 0.001521733 | 22.46301046 |
| EN-RAGE | 22 | 17406250 | T | C | 0.2064 | 0.0425 | 0.0239 | 1.19E-06 | rs55783131 | 14728 | 0.001598832 | 23.58210379 |
| EN-RAGE | 22 | 18032226 | A | G | 0.0617 | 0.0125 | 0.6296 | 7.97E-07 | rs174344 | 14295 | 0.001701479 | 24.36068724 |
| FGF-19 | 1 | 85295202 | A | G | -0.1614 | 0.0352 | 0.9664 | 4.53E-06 | rs12407505 | 14735 | 0.001424795 | 21.02145549 |
| FGF-19 | 1 | 100098055 | A | G | -0.0614 | 0.0128 | 0.3002 | 1.61E-06 | rs834971 | 14728 | 0.001559894 | 23.0068851 |
| FGF-19 | 3 | 74674996 | A | G | 0.2371 | 0.0482 | 0.9755 | 8.69E-07 | rs574352299 | 10894 | 0.002216247 | 24.19297592 |
| FGF-19 | 3 | 132162249 | A | G | -0.0927 | 0.0199 | 0.1012 | 3.19E-06 | rs112126444 | 14735 | 0.001470497 | 21.69673398 |
| FGF-19 | 4 | 39457617 | A | G | 0.0837 | 0.0124 | 0.3415 | 1.48E-11 | rs13103023 | 14296 | 0.003176955 | 45.55612584 |
| FGF-19 | 5 | 54847098 | T | C | -0.1014 | 0.0221 | 0.9175 | 4.47E-06 | rs12520287 | 14296 | 0.001470408 | 21.04895797 |
| FGF-19 | 6 | 168606201 | T | C | -0.136 | 0.0297 | 0.0418 | 4.67E-06 | rs12110436 | 14743 | 0.00142024 | 20.96553739 |
| FGF-19 | 7 | 17445553 | T | C | 0.1992 | 0.0421 | 0.9777 | 2.23E-06 | rs145274424 | 14735 | 0.001517068 | 22.38491889 |
| FGF-19 | 7 | 101569302 | T | C | -0.0623 | 0.0135 | 0.2503 | 3.93E-06 | rs2906655 | 14743 | 0.001442433 | 21.29362674 |
| FGF-19 | 8 | 59382715 | A | G | -0.1055 | 0.0123 | 0.3458 | 9.72E-18 | rs7005978 | 14744 | 0.004964983 | 73.55899398 |
| FGF-19 | 9 | 18148302 | A | G | 0.073 | 0.0156 | 0.1762 | 2.88E-06 | rs79110990 | 14295 | 0.001529493 | 21.89453659 |
| FGF-19 | 9 | 84435749 | A | G | 0.2151 | 0.0456 | 0.0203 | 2.39E-06 | rs35836706 | 14734 | 0.001507909 | 22.24806169 |
| FGF-19 | 9 | 136095770 | C | G | 0.1199 | 0.0247 | 0.0898 | 1.21E-06 | rs11244038 | 11786 | 0.001995311 | 23.55975429 |
| FGF-19 | 11 | 5610048 | T | C | 0.2325 | 0.0488 | 0.9812 | 1.89E-06 | rs191522330 | 14738 | 0.001537798 | 22.69589592 |
| FGF-19 | 11 | 114495920 | T | C | 0.0621 | 0.0132 | 0.6316 | 2.54E-06 | rs1671812 | 12412 | 0.001779999 | 22.12918159 |
| FGF-19 | 12 | 76644195 | A | G | -0.2295 | 0.0492 | 0.0198 | 3.09E-06 | rs142067135 | 13809 | 0.001573219 | 21.75566032 |
| FGF-19 | 12 | 91080475 | A | G | -0.0767 | 0.0166 | 0.1923 | 3.83E-06 | rs10777251 | 12411 | 0.001717202 | 21.34541293 |
| FGF-19 | 12 | 108147245 | T | C | 0.1024 | 0.0222 | 0.9158 | 3.98E-06 | rs76708593 | 14296 | 0.00148605 | 21.27321859 |
| FGF-19 | 13 | 85357827 | T | C | 0.2161 | 0.0471 | 0.0209 | 4.47E-06 | rs17326790 | 14741 | 0.001426005 | 21.04790099 |
| FGF-19 | 15 | 59188192 | T | C | 0.2583 | 0.0564 | 0.0178 | 4.65E-06 | rs117398067 | 14744 | 0.001420555 | 20.97160596 |
| FGF-19 | 19 | 5851801 | A | G | 0.0674 | 0.0141 | 0.2338 | 1.75E-06 | rs2306969 | 14739 | 0.001547892 | 22.84665546 |
| FGF-19 | 19 | 49206172 | T | C | -0.1661 | 0.0118 | 0.445 | 5.31E-45 | rs516246 | 14744 | 0.013260577 | 198.1145329 |
| FGF-21 | 1 | 203746507 | A | G | -0.1747 | 0.036 | 0.037 | 1.22E-06 | rs145127946 | 14295 | 0.001644681 | 23.54615738 |
| FGF-21 | 1 | 216837226 | T | G | -0.1557 | 0.0318 | 0.0383 | 9.77E-07 | rs10495032 | 14720 | 0.001625955 | 23.9697759 |
| FGF-21 | 2 | 27730940 | T | C | 0.1323 | 0.0119 | 0.3977 | 1.03E-28 | rs1260326 | 14730 | 0.008321354 | 123.5852938 |
| FGF-21 | 3 | 11689679 | T | C | -0.0568 | 0.012 | 0.4644 | 2.21E-06 | rs7610704 | 14295 | 0.00156484 | 22.40130986 |
| FGF-21 | 5 | 55882435 | T | C | -0.063 | 0.0136 | 0.2698 | 3.62E-06 | rs4700382 | 14295 | 0.001498883 | 21.45569151 |
| FGF-21 | 5 | 84356011 | T | C | -0.0881 | 0.019 | 0.8922 | 3.54E-06 | rs60277384 | 14742 | 0.001456315 | 21.49738783 |
| FGF-21 | 7 | 73030175 | A | G | -0.1609 | 0.0176 | 0.1297 | 6.13E-20 | rs13229619 | 14743 | 0.005636972 | 83.56565724 |
| FGF-21 | 8 | 9173209 | A | G | -0.0605 | 0.012 | 0.4812 | 4.61E-07 | rs7012637 | 14295 | 0.001774976 | 25.41484651 |
| FGF-21 | 10 | 127847758 | A | G | -0.3801 | 0.0749 | 0.0104 | 3.88E-07 | rs188758663 | 11668 | 0.002202309 | 25.74883922 |
| FGF-21 | 11 | 76480255 | T | C | -0.0689 | 0.0145 | 0.2168 | 2.02E-06 | rs12290350 | 14295 | 0.001577004 | 22.57572329 |
| FGF-21 | 12 | 47198899 | A | C | -0.0812 | 0.0147 | 0.795 | 3.32E-08 | rs2429473 | 14295 | 0.002129939 | 30.50820268 |
| FGF-21 | 18 | 72826607 | A | G | -0.2215 | 0.0444 | 0.031 | 6.08E-07 | rs72965996 | 13808 | 0.001799155 | 24.88390941 |
| FGF-21 | 19 | 49260677 | A | C | 0.1627 | 0.013 | 0.501 | 6.15E-36 | rs838131 | 14294 | 0.010839306 | 156.6129359 |
| FGF-21 | 21 | 33860969 | T | C | -0.2352 | 0.0455 | 0.0232 | 2.35E-07 | rs142603673 | 14252 | 0.001871382 | 26.71719696 |
| FGF-23 | 1 | 146522722 | T | C | 0.0708 | 0.0136 | 0.7502 | 1.93E-07 | rs671205 | 14287 | 0.001893323 | 27.09741724 |
| FGF-23 | 2 | 121962947 | T | G | 0.0941 | 0.0185 | 0.8733 | 3.65E-07 | rs6753743 | 14287 | 0.001807628 | 25.86872297 |
| FGF-23 | 2 | 190446541 | C | G | 0.1163 | 0.0131 | 0.2897 | 6.82E-19 | rs3811621 | 14286 | 0.00548677 | 78.80541018 |
| FGF-23 | 4 | 40142535 | T | C | 0.0685 | 0.0144 | 0.2406 | 1.97E-06 | rs794007 | 12844 | 0.001758699 | 22.62499685 |
| FGF-23 | 4 | 124325226 | A | T | -0.1845 | 0.0389 | 0.9748 | 2.11E-06 | rs11930290 | 12848 | 0.001747826 | 22.49188882 |
| FGF-23 | 5 | 146629145 | A | G | 0.1704 | 0.0348 | 0.0295 | 9.75E-07 | rs34551523 | 14730 | 0.001625068 | 23.97296336 |
| FGF-23 | 5 | 176814656 | A | G | -0.0653 | 0.0135 | 0.2766 | 1.32E-06 | rs33921462 | 14287 | 0.00163496 | 23.39365202 |
| FGF-23 | 6 | 31175118 | A | C | -0.2224 | 0.0479 | 0.0191 | 3.43E-06 | rs181409232 | 12846 | 0.001675338 | 21.55415086 |
| FGF-23 | 6 | 81343345 | A | G | -0.0768 | 0.0166 | 0.8634 | 3.72E-06 | rs12195292 | 14710 | 0.001452988 | 21.40164779 |
| FGF-23 | 7 | 12540548 | C | G | 0.1059 | 0.0222 | 0.1002 | 1.84E-06 | rs370203222 | 11759 | 0.001931417 | 22.75160814 |
| FGF-23 | 11 | 106531034 | A | G | 0.2362 | 0.0507 | 0.0187 | 3.18E-06 | rs118177380 | 14287 | 0.001516853 | 21.70116594 |
| FGF-23 | 12 | 4479549 | A | G | -0.0959 | 0.0178 | 0.1141 | 7.14E-08 | rs7955866 | 14719 | 0.001968173 | 29.0227255 |
| FGF-23 | 14 | 22607677 | A | G | -0.1085 | 0.0235 | 0.8871 | 3.89E-06 | rs75338333 | 10893 | 0.001953112 | 21.3129716 |
| FGF-23 | 16 | 83137317 | T | C | -0.056 | 0.0119 | 0.4938 | 2.53E-06 | rs11150539 | 14287 | 0.001547635 | 22.14222865 |
| FGF-23 | 20 | 52731402 | A | T | 0.0907 | 0.0134 | 0.706 | 1.30E-11 | rs6127099 | 14287 | 0.003196491 | 45.80830026 |
| FGF-23 | 22 | 18002038 | A | G | 0.1228 | 0.0257 | 0.0941 | 1.77E-06 | rs368215473 | 9397 | 0.002423747 | 22.82643265 |
| FGF-23 | 22 | 22238107 | T | C | 0.0803 | 0.0166 | 0.1851 | 1.32E-06 | rs35590112 | 12386 | 0.001885663 | 23.39617074 |
| FGF-5 | 1 | 101733215 | A | G | 0.1023 | 0.0224 | 0.0841 | 4.95E-06 | rs9433760 | 11788 | 0.00176623 | 20.85362408 |
| FGF-5 | 1 | 109814880 | T | C | -0.0729 | 0.0155 | 0.2041 | 2.56E-06 | rs4970834 | 11786 | 0.001873315 | 22.11657932 |
| FGF-5 | 1 | 216050785 | T | C | -0.0599 | 0.0127 | 0.6038 | 2.40E-06 | rs11120686 | 11786 | 0.001883913 | 22.24193155 |
| FGF-5 | 2 | 45095097 | A | G | -0.0586 | 0.0128 | 0.364 | 4.69E-06 | rs11674185 | 11787 | 0.001775009 | 20.95567219 |
| FGF-5 | 2 | 144875473 | T | C | 0.2883 | 0.0608 | 0.0166 | 2.12E-06 | rs148332905 | 11341 | 0.001978657 | 22.48047747 |
| FGF-5 | 2 | 229871311 | T | C | -0.3042 | 0.0659 | 0.0146 | 3.91E-06 | rs189846846 | 9980 | 0.002130545 | 21.30397033 |
| FGF-5 | 2 | 241614719 | A | G | -0.0988 | 0.0213 | 0.1585 | 3.51E-06 | rs369482528 | 8813 | 0.002435409 | 21.51077776 |
| FGF-5 | 4 | 70058335 | A | C | -0.0728 | 0.015 | 0.2193 | 1.21E-06 | rs4326078 | 11789 | 0.001994052 | 23.55084837 |
| FGF-5 | 4 | 80968240 | A | G | 0.1131 | 0.0207 | 0.8677 | 4.66E-08 | rs62298642 | 11341 | 0.002625376 | 29.84749745 |
| FGF-5 | 4 | 81152002 | A | T | 0.1827 | 0.0244 | 0.918 | 7.01E-14 | rs56373850 | 11774 | 0.004739257 | 56.05620129 |
| FGF-5 | 4 | 81157703 | T | C | -0.439 | 0.0125 | 0.6404 | 1.00E-200 | rs1902859 | 11786 | 0.09473655 | 1233.205098 |
| FGF-5 | 4 | 81702627 | A | G | 0.4543 | 0.0594 | 0.9822 | 2.04E-14 | rs144059387 | 9873 | 0.005889765 | 58.48232078 |
| FGF-5 | 4 | 82055771 | A | G | 0.1456 | 0.0311 | 0.0538 | 2.85E-06 | rs75140224 | 11789 | 0.001855745 | 21.91433457 |
| FGF-5 | 6 | 39710570 | T | C | 0.1185 | 0.0249 | 0.0828 | 1.95E-06 | rs305897 | 11341 | 0.001993059 | 22.64443095 |
| FGF-5 | 6 | 89057163 | A | G | -0.1705 | 0.0361 | 0.036 | 2.32E-06 | rs148797749 | 11785 | 0.001889224 | 22.3028649 |
| FGF-5 | 8 | 106471400 | A | G | 0.2554 | 0.0552 | 0.9848 | 3.71E-06 | rs150524893 | 11298 | 0.001891211 | 21.40359594 |
| FGF-5 | 8 | 143464103 | A | T | 0.1673 | 0.0356 | 0.9648 | 2.61E-06 | rs77210320 | 11786 | 0.001870305 | 22.0809718 |
| FGF-5 | 9 | 1354486 | A | G | -0.0909 | 0.0192 | 0.8798 | 2.20E-06 | rs1412253 | 11778 | 0.001899451 | 22.41050051 |
| FGF-5 | 9 | 7476426 | T | C | 0.2266 | 0.0453 | 0.0223 | 5.67E-07 | rs117253850 | 11781 | 0.002119434 | 25.01783206 |
| FGF-5 | 9 | 133305614 | T | C | 0.1509 | 0.0322 | 0.0458 | 2.78E-06 | rs12005489 | 10725 | 0.00204353 | 21.95764409 |
| FGF-5 | 11 | 75754620 | T | G | 0.0619 | 0.0133 | 0.4196 | 3.25E-06 | rs624605 | 11341 | 0.001906329 | 21.65715581 |
| FGF-5 | 12 | 48680454 | A | G | 0.509 | 0.1062 | 0.006 | 1.64E-06 | rs112790107 | 9845 | 0.00232787 | 22.96668405 |
| FGF-5 | 13 | 62078600 | T | C | -0.0826 | 0.0165 | 0.1699 | 5.56E-07 | rs66613644 | 11787 | 0.002121615 | 25.05639054 |
| FGF-5 | 16 | 62005709 | A | G | -0.1197 | 0.0249 | 0.0816 | 1.53E-06 | rs56391958 | 11341 | 0.002033547 | 23.10537447 |
| FGF-5 | 18 | 14708913 | A | G | -0.1842 | 0.0395 | 0.0464 | 3.11E-06 | rs192746810 | 11341 | 0.001913823 | 21.74244926 |
| FIt3L | 1 | 159890969 | A | G | 0.0725 | 0.0129 | 0.4738 | 1.91E-08 | rs55633025 | 12404 | 0.00253998 | 31.58104976 |
| FIt3L | 2 | 8442736 | C | G | 0.0554 | 0.0119 | 0.382 | 3.23E-06 | rs186975 | 14703 | 0.001471906 | 21.67038 |
| FIt3L | 2 | 65602149 | T | C | -0.0746 | 0.0115 | 0.4771 | 8.76E-11 | rs1866051 | 14732 | 0.002848272 | 42.0748921 |
| FIt3L | 3 | 128381886 | T | G | -0.1061 | 0.0119 | 0.6093 | 4.84E-19 | rs7624160 | 14719 | 0.005371794 | 79.483655 |
| FIt3L | 3 | 141150026 | A | G | 0.0611 | 0.0129 | 0.5605 | 2.18E-06 | rs7625643 | 12404 | 0.00180533 | 22.43019088 |
| FIt3L | 3 | 170851052 | A | G | -0.1569 | 0.0338 | 0.9624 | 3.45E-06 | rs61792394 | 14286 | 0.001506077 | 21.54525717 |
| FIt3L | 4 | 20519864 | A | G | -0.0904 | 0.0192 | 0.8501 | 2.50E-06 | rs575588389 | 12129 | 0.001824384 | 22.16474734 |
| FIt3L | 4 | 55408999 | T | C | 0.0833 | 0.016 | 0.8361 | 1.93E-07 | rs218265 | 14731 | 0.001836621 | 27.10135906 |
| FIt3L | 4 | 57902945 | A | T | 0.0539 | 0.0117 | 0.4587 | 4.09E-06 | rs1277312 | 14719 | 0.001439799 | 21.22006899 |
| FIt3L | 4 | 105806108 | A | T | 0.2206 | 0.0324 | 0.9647 | 9.85E-12 | rs144317085 | 14722 | 0.003138982 | 46.35130782 |
| FIt3L | 5 | 1282319 | A | C | -0.1191 | 0.0128 | 0.3326 | 1.34E-20 | rs7726159 | 14733 | 0.005842084 | 86.56545664 |
| FIt3L | 5 | 6289394 | T | C | 0.0603 | 0.0127 | 0.3741 | 2.05E-06 | rs1379304 | 14286 | 0.001575548 | 22.54064702 |
| FIt3L | 6 | 18758144 | T | C | 0.0959 | 0.0202 | 0.9089 | 2.06E-06 | rs139721800 | 14715 | 0.001529359 | 22.53592787 |
| FIt3L | 6 | 41985436 | T | C | 0.0643 | 0.0136 | 0.2577 | 2.27E-06 | rs9381118 | 14285 | 0.001562373 | 22.35029813 |
| FIt3L | 6 | 77907355 | T | C | -0.0559 | 0.0117 | 0.4699 | 1.77E-06 | rs6453962 | 14732 | 0.001547098 | 22.8240615 |
| FIt3L | 6 | 91008027 | A | C | 0.0676 | 0.0128 | 0.326 | 1.28E-07 | rs6925032 | 14286 | 0.001948569 | 27.88769682 |
| FIt3L | 7 | 3914756 | A | G | -0.0749 | 0.0147 | 0.1924 | 3.48E-07 | rs28533776 | 14731 | 0.001759268 | 25.95792651 |
| FIt3L | 9 | 243950 | T | C | 0.1812 | 0.0386 | 0.026 | 2.68E-06 | rs192857133 | 14727 | 0.001494095 | 22.03346469 |
| FIt3L | 9 | 10640144 | A | G | -0.1429 | 0.0299 | 0.9571 | 1.76E-06 | rs57191857 | 14734 | 0.001547849 | 22.83826593 |
| FIt3L | 9 | 94348687 | T | C | -0.0851 | 0.0186 | 0.1096 | 4.76E-06 | rs12338549 | 14719 | 0.001420161 | 20.93024039 |
| FIt3L | 10 | 101403323 | T | C | 0.1483 | 0.0306 | 0.9513 | 1.26E-06 | rs185979634 | 12847 | 0.001824923 | 23.48398712 |
| FIt3L | 10 | 105351013 | T | C | 0.3529 | 0.076 | 0.9914 | 3.43E-06 | rs74722523 | 11437 | 0.001881681 | 21.55758861 |
| FIt3L | 11 | 62294309 | T | C | -0.1519 | 0.0331 | 0.0364 | 4.45E-06 | rs141117375 | 14286 | 0.001472005 | 21.05710952 |
| FIt3L | 11 | 108311965 | A | G | -0.0772 | 0.0117 | 0.4171 | 4.16E-11 | rs11212636 | 14723 | 0.002948385 | 43.53152461 |
| FIt3L | 11 | 113982321 | A | T | 0.0588 | 0.0125 | 0.3111 | 2.55E-06 | rs73000965 | 14731 | 0.001499859 | 22.12461178 |
| FIt3L | 13 | 28455266 | A | T | 0.0821 | 0.0128 | 0.3602 | 1.42E-10 | rs9554186 | 14286 | 0.002871487 | 41.13443824 |
| FIt3L | 13 | 28604007 | T | C | -1.1019 | 0.0524 | 0.9832 | 3.59E-98 | rs76428106 | 13799 | 0.031050966 | 442.1390175 |
| FIt3L | 14 | 51156734 | A | G | 0.1302 | 0.0266 | 0.9447 | 9.84E-07 | rs72681653 | 14734 | 0.001623426 | 23.95519662 |
| FIt3L | 18 | 70532840 | T | G | 0.0556 | 0.0121 | 0.408 | 4.33E-06 | rs10164255 | 14729 | 0.001431474 | 21.1115377 |
| FIt3L | 19 | 49979398 | A | G | 0.1179 | 0.022 | 0.0907 | 8.36E-08 | rs17272847 | 13222 | 0.002167419 | 28.71551112 |
| FIt3L | 20 | 4261712 | T | C | -0.4307 | 0.0883 | 0.0075 | 1.07E-06 | rs142870956 | 11952 | 0.001986663 | 23.78787552 |
| FIt3L | 20 | 30439298 | T | G | 0.0884 | 0.016 | 0.1818 | 3.29E-08 | rs78429945 | 14286 | 0.002132195 | 30.5213515 |
| hGDNF | 1 | 199872965 | A | T | 0.1128 | 0.0219 | 0.8739 | 2.60E-07 | rs199503547 | 10894 | 0.002429329 | 26.52468477 |
| hGDNF | 2 | 208746333 | A | T | 0.3366 | 0.0697 | 0.9898 | 1.37E-06 | rs144181640 | 13988 | 0.001664499 | 23.31849769 |
| hGDNF | 3 | 36072052 | T | C | -0.0981 | 0.0196 | 0.0997 | 5.58E-07 | rs62243355 | 14731 | 0.00169768 | 25.04764531 |
| hGDNF | 5 | 37868088 | A | G | -0.3888 | 0.0198 | 0.0906 | 7.56E-86 | rs11740708 | 14710 | 0.025543014 | 385.5343517 |
| hGDNF | 5 | 37918839 | A | T | -0.1683 | 0.0179 | 0.1296 | 5.34E-21 | rs2194229 | 14288 | 0.006149106 | 88.38964186 |
| hGDNF | 5 | 38094871 | A | T | 0.0829 | 0.0124 | 0.352 | 2.30E-11 | rs2453338 | 14734 | 0.003024333 | 44.68962757 |
| hGDNF | 6 | 134688249 | T | C | 0.1531 | 0.0333 | 0.0371 | 4.27E-06 | rs112594435 | 14721 | 0.001433842 | 21.13503187 |
| hGDNF | 8 | 107706686 | T | G | -0.2941 | 0.0616 | 0.0124 | 1.80E-06 | rs540456481 | 10894 | 0.002088014 | 22.79023936 |
| hGDNF | 9 | 5230371 | C | G | 0.0606 | 0.0129 | 0.3 | 2.63E-06 | rs2093446 | 14288 | 0.001542141 | 22.0650559 |
| hGDNF | 10 | 87694408 | A | C | -0.1194 | 0.0208 | 0.0859 | 9.45E-09 | rs77671113 | 14725 | 0.002232831 | 32.94753988 |
| hGDNF | 12 | 98629454 | A | G | 0.2584 | 0.0539 | 0.0148 | 1.63E-06 | rs138691533 | 14731 | 0.001557752 | 22.97992045 |
| hGDNF | 13 | 28147359 | A | G | 0.0915 | 0.0196 | 0.903 | 3.04E-06 | rs57104839 | 14736 | 0.001476756 | 21.79069581 |
| hGDNF | 13 | 67293674 | T | C | 0.1918 | 0.042 | 0.0254 | 4.96E-06 | rs79953230 | 14719 | 0.001414834 | 20.85161077 |
| hGDNF | 17 | 1490782 | A | G | -0.0718 | 0.0154 | 0.7373 | 3.13E-06 | rs35740453 | 13224 | 0.001641086 | 21.73410491 |
| hGDNF | 17 | 14221290 | T | G | 0.2096 | 0.0453 | 0.0231 | 3.71E-06 | rs9303102 | 12935 | 0.001652348 | 21.40518556 |
| hGDNF | 19 | 14805280 | T | C | 0.0816 | 0.014 | 0.3119 | 5.59E-09 | rs55850217 | 11755 | 0.002881697 | 33.96646485 |
| hGDNF | 21 | 20242381 | A | T | -0.3321 | 0.0721 | 0.02 | 4.10E-06 | rs570043519 | 8911 | 0.002375243 | 21.21141969 |
| HGF | 1 | 38949303 | T | C | 0.0992 | 0.0217 | 0.8959 | 4.84E-06 | rs34219417 | 14286 | 0.001460691 | 20.89503353 |
| HGF | 1 | 83864840 | T | C | -0.405 | 0.0832 | 0.9907 | 1.13E-06 | rs138848271 | 10793 | 0.002190629 | 23.69097363 |
| HGF | 2 | 108946178 | A | G | 0.0564 | 0.0114 | 0.4434 | 7.52E-07 | rs6709159 | 14734 | 0.001658468 | 24.47313185 |
| HGF | 3 | 128064791 | A | G | 0.2047 | 0.0391 | 0.0276 | 1.65E-07 | rs2737756 | 14718 | 0.001858769 | 27.40458004 |
| HGF | 3 | 171934440 | A | G | -0.0856 | 0.0179 | 0.1397 | 1.73E-06 | rs7620568 | 12846 | 0.001777056 | 22.86513904 |
| HGF | 4 | 3452345 | A | G | 0.1219 | 0.0131 | 0.328 | 1.34E-20 | rs59950280 | 13222 | 0.006506281 | 86.57632009 |
| HGF | 4 | 31819358 | A | G | -0.0699 | 0.0152 | 0.6438 | 4.25E-06 | rs183596950 | 11538 | 0.001829538 | 21.14423069 |
| HGF | 6 | 622484 | A | G | 0.4297 | 0.0934 | 0.0078 | 4.21E-06 | rs115009171 | 10300 | 0.002050729 | 21.16180059 |
| HGF | 6 | 32487091 | T | G | 0.0993 | 0.0215 | 0.7957 | 3.86E-06 | rs201840950 | 10216 | 0.002083698 | 21.32733283 |
| HGF | 7 | 81358266 | C | G | -0.1545 | 0.0332 | 0.964 | 3.26E-06 | rs5745692 | 14716 | 0.001469442 | 21.65318431 |
| HGF | 7 | 81359051 | T | C | -0.1943 | 0.0242 | 0.0608 | 9.83E-16 | rs5745687 | 14733 | 0.004356398 | 64.45489569 |
| HGF | 8 | 72362254 | A | G | 0.3666 | 0.0747 | 0.014 | 9.22E-07 | rs113903858 | 11137 | 0.00215793 | 24.08051215 |
| HGF | 9 | 107570130 | T | C | 0.0769 | 0.0164 | 0.7969 | 2.75E-06 | rs5007364 | 11760 | 0.00186615 | 21.98321046 |
| HGF | 10 | 30042437 | T | C | -0.2429 | 0.0489 | 0.9809 | 6.79E-07 | rs74130123 | 14734 | 0.001671822 | 24.67052298 |
| HGF | 14 | 65654346 | T | C | 0.1572 | 0.0311 | 0.9611 | 4.31E-07 | rs57193877 | 14725 | 0.001732113 | 25.54614153 |
| HGF | 15 | 101649383 | A | T | -0.0638 | 0.012 | 0.6021 | 1.06E-07 | rs11631440 | 14709 | 0.001918059 | 28.26310095 |
| HGF | 17 | 7014969 | T | C | -0.0992 | 0.0217 | 0.0942 | 4.84E-06 | rs4290523 | 12846 | 0.001624165 | 20.89470557 |
| HGF | 17 | 45959996 | T | C | -0.1954 | 0.039 | 0.9572 | 5.44E-07 | rs1986719 | 14718 | 0.001702672 | 25.09925814 |
| HGF | 18 | 76506666 | A | T | 0.1566 | 0.0327 | 0.9642 | 1.68E-06 | rs150498795 | 14732 | 0.001554357 | 22.93131958 |
| HGF | 19 | 42769693 | A | G | -0.1182 | 0.0257 | 0.9405 | 4.24E-06 | rs851612 | 14286 | 0.00147848 | 21.14987973 |
| HGF | 19 | 58888317 | A | G | 0.0592 | 0.0127 | 0.5179 | 3.14E-06 | rs8106345 | 12404 | 0.001748695 | 21.72530794 |
| HGF | 20 | 6103587 | T | C | -0.0698 | 0.0151 | 0.7983 | 3.79E-06 | rs2281532 | 14286 | 0.001493472 | 21.3646679 |
| IFN-gamma | 2 | 19234534 | T | G | 0.1461 | 0.0307 | 0.9482 | 1.95E-06 | rs67101138 | 11793 | 0.001916753 | 22.64383709 |
| IFN-gamma | 3 | 2921515 | A | C | 0.0648 | 0.014 | 0.4253 | 3.68E-06 | rs6442763 | 11345 | 0.001884821 | 21.41989671 |
| IFN-gamma | 10 | 130545142 | A | G | 0.136 | 0.0283 | 0.9427 | 1.54E-06 | rs61863416 | 11774 | 0.001957627 | 23.09038465 |
| IFN-gamma | 11 | 110972327 | T | C | 0.4666 | 0.0897 | 0.0122 | 1.97E-07 | rs140562194 | 7396 | 0.003645203 | 27.05123683 |
| IFN-gamma | 13 | 27473585 | T | C | 0.3485 | 0.0708 | 0.9882 | 8.55E-07 | rs74903999 | 10558 | 0.002289612 | 24.22460885 |
| IFN-gamma | 13 | 90334795 | C | G | 0.1935 | 0.0384 | 0.9683 | 4.68E-07 | rs146527076 | 11781 | 0.002150712 | 25.38784018 |
| IFN-gamma | 16 | 33979312 | T | G | 0.2684 | 0.0573 | 0.0324 | 2.81E-06 | rs531747046 | 6257 | 0.003494374 | 21.93395449 |
| IFN-gamma | 17 | 26694861 | A | G | -0.0635 | 0.0127 | 0.4705 | 5.73E-07 | rs704 | 11793 | 0.002115417 | 24.9957602 |
| IFN-gamma | 20 | 46408844 | T | C | 0.0671 | 0.0137 | 0.5585 | 9.69E-07 | rs4810686 | 11344 | 0.002110184 | 23.98431565 |
| IFN-gamma | 21 | 37335521 | A | G | 0.2184 | 0.0403 | 0.0412 | 5.98E-08 | rs62230781 | 11345 | 0.002582069 | 29.36422936 |
| IL-10 | 1 | 87832695 | A | G | 0.0565 | 0.0121 | 0.3683 | 3.02E-06 | rs4655953 | 14722 | 0.001478824 | 21.800535 |
| IL-10 | 1 | 206954566 | A | G | -0.0996 | 0.0151 | 0.2042 | 4.22E-11 | rs12123181 | 14296 | 0.003034105 | 43.50147878 |
| IL-10 | 2 | 87296860 | A | C | 0.1647 | 0.0338 | 0.0539 | 1.10E-06 | rs549056348 | 11768 | 0.002013612 | 23.73995996 |
| IL-10 | 2 | 125939274 | T | G | 0.1937 | 0.0418 | 0.0455 | 3.59E-06 | rs138203589 | 14730 | 0.001455698 | 21.47077429 |
| IL-10 | 2 | 173757986 | A | G | 0.0771 | 0.0162 | 0.8403 | 1.94E-06 | rs3769274 | 14742 | 0.001534107 | 22.64747577 |
| IL-10 | 2 | 201728383 | T | C | -0.2351 | 0.0486 | 0.0174 | 1.32E-06 | rs188535859 | 14741 | 0.001584955 | 23.39773363 |
| IL-10 | 3 | 8954959 | A | G | -0.1293 | 0.0218 | 0.9146 | 3.01E-09 | rs398518 | 14296 | 0.002454721 | 35.17412485 |
| IL-10 | 4 | 185304872 | A | G | 0.0981 | 0.0211 | 0.0999 | 3.33E-06 | rs72701782 | 14296 | 0.001509741 | 21.61286508 |
| IL-10 | 5 | 19244332 | T | C | -0.0753 | 0.0149 | 0.8011 | 4.33E-07 | rs10067443 | 14296 | 0.001783314 | 25.53622251 |
| IL-10 | 6 | 7880027 | T | C | 0.0555 | 0.0119 | 0.6126 | 3.10E-06 | rs385697 | 14727 | 0.001474812 | 21.74868785 |
| IL-10 | 6 | 18825879 | T | C | 0.2951 | 0.0626 | 0.014 | 2.43E-06 | rs17654493 | 12313 | 0.001801535 | 22.21872862 |
| IL-10 | 6 | 31325886 | C | G | -0.065 | 0.0129 | 0.6959 | 4.69E-07 | rs9266257 | 14728 | 0.001720899 | 25.38565148 |
| IL-10 | 6 | 32453163 | T | C | -0.1528 | 0.0196 | 0.8893 | 6.39E-15 | rs67037615 | 14296 | 0.004233286 | 60.76784062 |
| IL-10 | 6 | 122709508 | A | G | 0.3666 | 0.0761 | 0.9898 | 1.45E-06 | rs150408090 | 12313 | 0.001881196 | 23.20304913 |
| IL-10 | 6 | 169465075 | A | G | -0.0574 | 0.0125 | 0.6162 | 4.39E-06 | rs389239 | 14296 | 0.001472818 | 21.08351402 |
| IL-10 | 7 | 590757 | C | G | 0.1112 | 0.0239 | 0.1005 | 3.28E-06 | rs148332061 | 13232 | 0.001633347 | 21.64452825 |
| IL-10 | 8 | 61861039 | T | C | 0.0681 | 0.0143 | 0.2791 | 1.91E-06 | rs66624860 | 12799 | 0.001768794 | 22.67536465 |
| IL-10 | 9 | 18625666 | A | T | -0.2845 | 0.0618 | 0.0122 | 4.15E-06 | rs79438518 | 13809 | 0.001532355 | 21.18969407 |
| IL-10 | 11 | 117864063 | A | G | -0.1597 | 0.0154 | 0.823 | 3.39E-25 | rs3135932 | 14744 | 0.007240973 | 107.5250059 |
| IL-10 | 14 | 20318041 | T | C | 0.1401 | 0.0291 | 0.1028 | 1.48E-06 | rs76932862 | 12412 | 0.001863967 | 23.17503012 |
| IL-10RA | 1 | 56566352 | A | G | -0.1247 | 0.0252 | 0.0839 | 7.48E-07 | rs6670799 | 11345 | 0.002153729 | 24.48247148 |
| IL-10RA | 3 | 158540291 | T | G | 0.082 | 0.0179 | 0.1526 | 4.63E-06 | rs41272625 | 11784 | 0.001777691 | 20.98205047 |
| IL-10RA | 5 | 154443639 | T | G | 0.0623 | 0.0131 | 0.5891 | 1.98E-06 | rs286605 | 11793 | 0.001914155 | 22.61308644 |
| IL-10RA | 6 | 78703747 | A | C | 0.4057 | 0.0865 | 0.9896 | 2.73E-06 | rs180893431 | 9340 | 0.002349683 | 21.99301619 |
| IL-10RA | 8 | 9104264 | T | G | 0.064 | 0.0135 | 0.4945 | 2.13E-06 | rs10091841 | 11345 | 0.001977099 | 22.47066074 |
| IL-10RA | 10 | 18335103 | T | C | 0.2347 | 0.0511 | 0.9822 | 4.37E-06 | rs80137559 | 11791 | 0.001785901 | 21.09165735 |
| IL-10RA | 11 | 117864063 | A | G | -0.0844 | 0.0168 | 0.8171 | 5.07E-07 | rs3135932 | 11793 | 0.002135569 | 25.23438185 |
| IL-10RA | 14 | 55005535 | A | G | 0.1676 | 0.0343 | 0.0481 | 1.03E-06 | rs17832137 | 10289 | 0.002315155 | 23.87126099 |
| IL-10RA | 14 | 66407688 | A | G | 0.3915 | 0.0823 | 0.9853 | 1.97E-06 | rs74719858 | 10858 | 0.002079744 | 22.62475368 |
| IL-10RA | 15 | 93461371 | C | G | 0.0623 | 0.0131 | 0.4267 | 1.98E-06 | rs1406714 | 11783 | 0.001915776 | 22.61308318 |
| IL-10RA | 16 | 5247086 | T | C | -0.3868 | 0.0841 | 0.0107 | 4.24E-06 | rs143313574 | 9956 | 0.002120188 | 21.14918751 |
| IL-10RB | 1 | 179682087 | A | G | 0.208 | 0.031 | 0.0438 | 1.95E-11 | rs142421172 | 12840 | 0.003493962 | 45.01275865 |
| IL-10RB | 1 | 212796908 | T | C | 0.1449 | 0.0311 | 0.0363 | 3.17E-06 | rs114288486 | 14730 | 0.001471545 | 21.70486163 |
| IL-10RB | 1 | 228433772 | T | C | 0.1926 | 0.0411 | 0.026 | 2.78E-06 | rs112798338 | 14286 | 0.001534798 | 21.95675306 |
| IL-10RB | 2 | 43150924 | A | G | 0.0637 | 0.0135 | 0.2684 | 2.38E-06 | rs7574167 | 12832 | 0.001732065 | 22.26094687 |
| IL-10RB | 2 | 176630651 | T | C | 0.1988 | 0.0402 | 0.0212 | 7.60E-07 | rs116315732 | 14734 | 0.001657066 | 24.45241166 |
| IL-10RB | 3 | 4275803 | T | C | -0.0548 | 0.0119 | 0.5866 | 4.12E-06 | rs1153572 | 14286 | 0.001482219 | 21.20344314 |
| IL-10RB | 4 | 119751261 | A | G | -0.0618 | 0.0134 | 0.2721 | 3.99E-06 | rs9685374 | 14286 | 0.001486656 | 21.26701558 |
| IL-10RB | 6 | 41174158 | A | G | 0.0532 | 0.0113 | 0.5488 | 2.50E-06 | rs34361138 | 14732 | 0.001502283 | 22.16192161 |
| IL-10RB | 6 | 55775469 | T | G | 0.0652 | 0.0142 | 0.3356 | 4.40E-06 | rs566450266 | 11759 | 0.001789659 | 21.0787392 |
| IL-10RB | 7 | 25740142 | A | G | -0.0843 | 0.0181 | 0.1348 | 3.20E-06 | rs111850948 | 14286 | 0.001516102 | 21.68888346 |
| IL-10RB | 9 | 136121303 | T | C | 0.0861 | 0.0169 | 0.1723 | 3.49E-07 | rs7855466 | 11783 | 0.002197968 | 25.95130321 |
| IL-10RB | 10 | 71477178 | A | G | -0.2327 | 0.0505 | 0.9827 | 4.07E-06 | rs192325200 | 13867 | 0.001528843 | 21.22987166 |
| IL-10RB | 10 | 103937244 | T | C | 0.0743 | 0.0161 | 0.8362 | 3.93E-06 | rs6584485 | 14286 | 0.001488567 | 21.2943835 |
| IL-10RB | 12 | 58388232 | C | G | -0.0601 | 0.0124 | 0.6484 | 1.25E-06 | rs1605333 | 13237 | 0.00177152 | 23.48767076 |
| IL-10RB | 16 | 13209083 | T | C | 0.1783 | 0.0348 | 0.9674 | 3.00E-07 | rs55780441 | 14734 | 0.001778486 | 26.24733674 |
| IL-10RB | 19 | 49553051 | C | G | -0.4295 | 0.0907 | 0.9904 | 2.19E-06 | rs117883662 | 8938 | 0.002502553 | 22.41891405 |
| IL-10RB | 20 | 39437913 | A | G | 0.2066 | 0.0444 | 0.0323 | 3.27E-06 | rs149156511 | 14286 | 0.001513305 | 21.64880307 |
| IL-10RB | 21 | 34510084 | A | G | 0.1586 | 0.0341 | 0.9665 | 3.30E-06 | rs75710908 | 14708 | 0.001468607 | 21.62910497 |
| IL-10RB | 21 | 34634808 | T | C | 0.1509 | 0.0251 | 0.9258 | 1.83E-09 | rs6517157 | 14286 | 0.002523614 | 36.13850915 |
| IL-10RB | 21 | 34651253 | T | C | -0.426 | 0.0117 | 0.5452 | 1.00E-200 | rs8178484 | 14286 | 0.084917478 | 1325.521177 |
| IL-12B | 2 | 64889908 | T | C | 0.0628 | 0.0134 | 0.7333 | 2.78E-06 | rs6750065 | 14286 | 0.001535083 | 21.9608369 |
| IL-12B | 2 | 112046960 | T | C | 0.0984 | 0.0194 | 0.1662 | 3.93E-07 | rs149993822 | 14287 | 0.001797481 | 25.72325583 |
| IL-12B | 3 | 5026008 | A | G | -0.1009 | 0.0151 | 0.8154 | 2.36E-11 | rs11130215 | 14732 | 0.003021708 | 44.64465534 |
| IL-12B | 3 | 171348710 | T | C | 0.1088 | 0.0228 | 0.0889 | 1.82E-06 | rs148549227 | 12403 | 0.001832588 | 22.76764235 |
| IL-12B | 3 | 188115682 | A | C | 0.2861 | 0.013 | 0.3539 | 2.43E-107 | rs9815073 | 14287 | 0.032789075 | 484.2707194 |
| IL-12B | 4 | 190527932 | T | C | 0.207 | 0.0442 | 0.0363 | 2.82E-06 | rs5014495 | 10208 | 0.002143993 | 21.92860753 |
| IL-12B | 5 | 158693364 | T | G | 0.3161 | 0.056 | 0.9869 | 1.66E-08 | rs144850787 | 14287 | 0.002225176 | 31.85753271 |
| IL-12B | 5 | 158767333 | A | G | -0.4981 | 0.0132 | 0.3025 | 1.00E-200 | rs10043720 | 12402 | 0.10298909 | 1423.689163 |
| IL-12B | 5 | 158852200 | A | G | 0.1694 | 0.0325 | 0.9592 | 1.87E-07 | rs17056751 | 14735 | 0.00184039 | 27.16446391 |
| IL-12B | 5 | 158907737 | T | C | -0.0857 | 0.0131 | 0.7246 | 6.07E-11 | rs17722688 | 14729 | 0.002897248 | 42.79175291 |
| IL-12B | 6 | 31154493 | A | G | 0.1155 | 0.014 | 0.2275 | 1.58E-16 | rs3130510 | 14735 | 0.004597866 | 68.05326179 |
| IL-12B | 7 | 6408796 | T | G | -0.0622 | 0.0119 | 0.5425 | 1.72E-07 | rs6968201 | 14287 | 0.001908605 | 27.31656247 |
| IL-12B | 8 | 4597842 | T | C | 0.219 | 0.0472 | 0.9787 | 3.49E-06 | rs117888068 | 11783 | 0.001823709 | 21.52437306 |
| IL-12B | 10 | 73114509 | T | C | -0.0695 | 0.0139 | 0.2389 | 5.73E-07 | rs780679 | 14729 | 0.001694456 | 24.99660534 |
| IL-12B | 10 | 94525783 | C | G | 0.0709 | 0.0149 | 0.8109 | 1.95E-06 | rs12766137 | 14726 | 0.00153521 | 22.63919322 |
| IL-12B | 11 | 47406592 | T | C | 0.0588 | 0.0116 | 0.5207 | 4.00E-07 | rs11039216 | 14730 | 0.001741322 | 25.6909227 |
| IL-12B | 11 | 96026074 | T | C | -0.0672 | 0.0129 | 0.2822 | 1.90E-07 | rs539598 | 14731 | 0.001838771 | 27.1331464 |
| IL-12B | 11 | 115767583 | A | G | -0.204 | 0.0435 | 0.0216 | 2.74E-06 | rs72993671 | 14246 | 0.001541413 | 21.98977805 |
| IL-12B | 12 | 17314071 | A | G | -0.197 | 0.0363 | 0.0298 | 5.73E-08 | rs1398590 | 14726 | 0.001996028 | 29.44829906 |
| IL-12B | 12 | 56435504 | C | G | 0.0785 | 0.0133 | 0.323 | 3.59E-09 | rs705705 | 12841 | 0.002705581 | 34.83119579 |
| IL-12B | 12 | 111884608 | T | C | 0.1332 | 0.0131 | 0.4766 | 2.76E-24 | rs3184504 | 11785 | 0.008696468 | 103.3694366 |
| IL-12B | 12 | 121197553 | C | G | 0.0721 | 0.0122 | 0.3473 | 3.42E-09 | rs516978 | 14725 | 0.002366283 | 34.92141853 |
| IL-12B | 13 | 28604007 | T | C | -0.3406 | 0.0535 | 0.9832 | 1.94E-10 | rs76428106 | 13800 | 0.00292839 | 40.52460379 |
| IL-12B | 14 | 68760141 | T | C | 0.0798 | 0.0128 | 0.7151 | 4.54E-10 | rs1950897 | 14735 | 0.002630823 | 38.86215612 |
| IL-12B | 14 | 103230758 | C | G | -0.1297 | 0.0127 | 0.6875 | 1.74E-24 | rs12588969 | 14287 | 0.007247239 | 104.2825663 |
| IL-12B | 15 | 80260554 | A | G | -0.0743 | 0.0132 | 0.2595 | 1.81E-08 | rs8026767 | 14734 | 0.002145736 | 31.67895228 |
| IL-12B | 18 | 26624891 | A | G | 0.0918 | 0.0201 | 0.9081 | 4.94E-06 | rs9965402 | 14729 | 0.001414182 | 20.85615627 |
| IL-12B | 22 | 37881211 | A | G | -0.1477 | 0.0246 | 0.0654 | 1.92E-09 | rs73416208 | 14729 | 0.002441495 | 36.04390207 |
| IL-13 | 1 | 162878651 | A | G | 0.0692 | 0.0136 | 0.3447 | 3.61E-07 | rs10917637 | 11772 | 0.002194472 | 25.88573981 |
| IL-13 | 1 | 193545592 | T | C | 0.193 | 0.039 | 0.9443 | 7.47E-07 | rs538021311 | 7943 | 0.003073717 | 24.48364295 |
| IL-13 | 3 | 123702960 | A | G | -0.0656 | 0.0141 | 0.3094 | 3.28E-06 | rs9881117 | 11791 | 0.001832408 | 21.64191972 |
| IL-13 | 3 | 143068250 | A | G | 0.064 | 0.0132 | 0.3961 | 1.24E-06 | rs10446322 | 11777 | 0.001992101 | 23.50381317 |
| IL-13 | 4 | 40938582 | A | G | 0.0739 | 0.0132 | 0.4958 | 2.16E-08 | rs13119159 | 11344 | 0.002755348 | 31.33750668 |
| IL-13 | 5 | 9974643 | C | G | -0.2968 | 0.0628 | 0.9858 | 2.29E-06 | rs183684201 | 11782 | 0.0018922 | 22.33236811 |
| IL-13 | 7 | 61999529 | A | G | 0.1832 | 0.039 | 0.9229 | 2.63E-06 | rs149979178 | 6901 | 0.003187302 | 22.05950902 |
| IL-13 | 7 | 154418309 | A | G | 0.169 | 0.0357 | 0.0397 | 2.20E-06 | rs76219628 | 11344 | 0.001971577 | 22.40579727 |
| IL-13 | 10 | 3623961 | A | G | -0.1845 | 0.0397 | 0.0751 | 3.36E-06 | rs11251952 | 11344 | 0.001900288 | 21.59410221 |
| IL-13 | 10 | 53942324 | T | G | 0.0734 | 0.0155 | 0.3902 | 2.19E-06 | rs12146346 | 8388 | 0.002666311 | 22.41946061 |
| IL-13 | 11 | 123332970 | C | G | -0.0702 | 0.015 | 0.6744 | 2.87E-06 | rs10893042 | 11344 | 0.001927027 | 21.8985385 |
| IL-13 | 13 | 41810092 | T | C | 0.2093 | 0.0446 | 0.9682 | 2.69E-06 | rs141726773 | 11344 | 0.001937583 | 22.01872484 |
| IL-13 | 15 | 57830694 | T | C | -0.0934 | 0.0183 | 0.8535 | 3.33E-07 | rs55924857 | 11792 | 0.002204174 | 26.04461294 |
| IL-13 | 16 | 79977921 | A | G | 0.2122 | 0.0439 | 0.0274 | 1.34E-06 | rs59235092 | 11784 | 0.001978831 | 23.3608157 |
| IL-15RA | 4 | 20169693 | A | T | 0.0919 | 0.0193 | 0.8082 | 1.92E-06 | rs56240706 | 8861 | 0.002552254 | 22.66826964 |
| IL-15RA | 4 | 140657353 | C | G | 0.0778 | 0.0162 | 0.8203 | 1.57E-06 | rs6845172 | 11772 | 0.00195537 | 23.0597914 |
| IL-15RA | 6 | 32560501 | A | G | 0.0749 | 0.0153 | 0.7077 | 9.81E-07 | rs9270551 | 11344 | 0.002108133 | 23.96095916 |
| IL-15RA | 8 | 27696981 | A | C | -0.3132 | 0.0684 | 0.0119 | 4.67E-06 | rs117428573 | 10857 | 0.001927452 | 20.96289665 |
| IL-15RA | 9 | 136154304 | T | C | -0.0726 | 0.0158 | 0.2166 | 4.33E-06 | rs649129 | 10918 | 0.001930087 | 21.10957572 |
| IL-15RA | 10 | 5815194 | A | T | -0.0867 | 0.0174 | 0.8028 | 6.27E-07 | rs12570881 | 11344 | 0.002183856 | 24.8235062 |
| IL-15RA | 10 | 6002368 | T | G | 0.3692 | 0.0127 | 0.5146 | 8.39E-186 | rs2228059 | 11344 | 0.069333601 | 844.9662605 |
| IL-15RA | 10 | 6009462 | T | G | -0.1967 | 0.0135 | 0.3975 | 4.34E-48 | rs7898286 | 11344 | 0.018370566 | 212.258264 |
| IL-15RA | 11 | 37594094 | A | G | -0.2278 | 0.0492 | 0.9801 | 3.66E-06 | rs145793996 | 11779 | 0.001816683 | 21.43401287 |
| IL-15RA | 12 | 111932800 | T | C | -0.0748 | 0.0133 | 0.5243 | 1.87E-08 | rs7137828 | 11344 | 0.00278051 | 31.62447605 |
| IL-15RA | 15 | 94729209 | A | T | -0.0849 | 0.017 | 0.4367 | 5.91E-07 | rs117046642 | 7943 | 0.003130195 | 24.93493102 |
| IL-15RA | 18 | 12175379 | T | C | 0.14 | 0.0294 | 0.0658 | 1.92E-06 | rs4459616 | 9899 | 0.002285475 | 22.67115554 |
| IL-15RA | 20 | 2629394 | A | T | 0.1159 | 0.0241 | 0.8743 | 1.52E-06 | rs192538756 | 9461 | 0.002438571 | 23.12282912 |
| IL-15RA | 21 | 15303777 | A | G | 0.3794 | 0.0799 | 0.0158 | 2.05E-06 | rs117484888 | 7423 | 0.003028339 | 22.54156504 |
| IL-15RA | 21 | 39896592 | A | G | 0.0796 | 0.0169 | 0.8384 | 2.48E-06 | rs2836464 | 11791 | 0.001877957 | 22.18089442 |
| IL-17A | 1 | 96622380 | A | C | -0.0802 | 0.0164 | 0.7781 | 1.01E-06 | rs33998516 | 11336 | 0.002105164 | 23.91026621 |
| IL-17A | 2 | 13468626 | T | C | -0.2432 | 0.0525 | 0.021 | 3.61E-06 | rs75788494 | 10574 | 0.002025297 | 21.45489447 |
| IL-17A | 3 | 63484616 | T | C | 0.1688 | 0.0349 | 0.0418 | 1.32E-06 | rs115193412 | 11778 | 0.001982261 | 23.38946444 |
| IL-17A | 3 | 189579511 | A | G | -0.0585 | 0.0128 | 0.5609 | 4.87E-06 | rs17448036 | 11783 | 0.001769566 | 20.88421094 |
| IL-17A | 6 | 32628224 | A | T | 0.0923 | 0.0189 | 0.221 | 1.04E-06 | rs41270871 | 8742 | 0.002720732 | 23.84407198 |
| IL-17A | 7 | 6380998 | A | G | -0.068 | 0.0148 | 0.2897 | 4.34E-06 | rs28852438 | 11336 | 0.001858774 | 21.10657502 |
| IL-17A | 8 | 70106392 | C | G | -0.0893 | 0.017 | 0.1776 | 1.50E-07 | rs1462017 | 11774 | 0.002338107 | 27.58870383 |
| IL-17A | 9 | 27215497 | T | C | -0.1279 | 0.0272 | 0.9323 | 2.57E-06 | rs77529534 | 11775 | 0.00187425 | 22.10698462 |
| IL-17A | 9 | 31560030 | C | G | -0.1467 | 0.0295 | 0.0555 | 6.60E-07 | rs79982350 | 11336 | 0.002176757 | 24.72518597 |
| IL-17A | 9 | 91976386 | A | G | 0.0908 | 0.0192 | 0.1411 | 2.25E-06 | rs4877075 | 11336 | 0.001969035 | 22.36107152 |
| IL-17A | 10 | 67955765 | T | G | 0.2446 | 0.0517 | 0.9819 | 2.23E-06 | rs34557923 | 10913 | 0.002046906 | 22.37959484 |
| IL-17A | 12 | 118130693 | T | G | 0.1696 | 0.0371 | 0.9648 | 4.84E-06 | rs77595989 | 11767 | 0.001772832 | 20.89440722 |
| IL-17A | 16 | 8011846 | T | C | -0.0726 | 0.0153 | 0.7391 | 2.08E-06 | rs12599620 | 11336 | 0.001982297 | 22.51198293 |
| IL-17A | 17 | 2272057 | T | C | 0.2309 | 0.0486 | 0.0251 | 2.02E-06 | rs2429911 | 11294 | 0.001994621 | 22.56827751 |
| IL-17A | 17 | 43658721 | T | G | 0.0884 | 0.0185 | 0.517 | 1.77E-06 | rs2693361 | 7943 | 0.002866354 | 22.82715074 |
| IL-17C | 1 | 176930254 | A | T | -0.3259 | 0.0548 | 0.9804 | 2.73E-09 | rs114882743 | 11345 | 0.003107787 | 35.36152905 |
| IL-17C | 1 | 242536005 | T | G | 0.1508 | 0.0327 | 0.0512 | 4.00E-06 | rs12092228 | 9892 | 0.002145312 | 21.26274651 |
| IL-17C | 2 | 136675328 | T | G | -0.2174 | 0.0469 | 0.9707 | 3.56E-06 | rs77654242 | 10294 | 0.002082973 | 21.48270712 |
| IL-17C | 2 | 239715033 | A | C | -0.2749 | 0.0524 | 0.9809 | 1.55E-07 | rs149756404 | 11302 | 0.002429267 | 27.51756787 |
| IL-17C | 4 | 24758319 | A | G | -0.0649 | 0.0141 | 0.5847 | 4.17E-06 | rs1072074 | 11785 | 0.001794492 | 21.1825119 |
| IL-17C | 4 | 152291909 | T | C | -0.1219 | 0.0262 | 0.9068 | 3.28E-06 | rs11931996 | 11345 | 0.001904463 | 21.64353827 |
| IL-17C | 5 | 19253845 | A | G | -0.0793 | 0.0167 | 0.6301 | 2.05E-06 | rs4593271 | 7943 | 0.002830726 | 22.54260316 |
| IL-17C | 5 | 107423766 | A | G | -0.0882 | 0.0177 | 0.8432 | 6.26E-07 | rs59356989 | 11790 | 0.002101663 | 24.82658357 |
| IL-17C | 5 | 174179760 | T | C | -0.0951 | 0.0201 | 0.1233 | 2.23E-06 | rs75246422 | 11793 | 0.001894615 | 22.38181284 |
| IL-17C | 5 | 174836306 | T | C | -0.1673 | 0.0366 | 0.0423 | 4.85E-06 | rs72815428 | 11775 | 0.001771327 | 20.89084175 |
| IL-17C | 6 | 66547346 | C | G | 0.0624 | 0.0135 | 0.6437 | 3.80E-06 | rs2814092 | 11792 | 0.00180854 | 21.36131464 |
| IL-17C | 7 | 21240100 | T | C | 0.0633 | 0.0132 | 0.3948 | 1.62E-06 | rs1920106 | 11792 | 0.001946373 | 22.99248396 |
| IL-17C | 9 | 107469519 | A | C | 0.3672 | 0.0763 | 0.0207 | 1.49E-06 | rs111268024 | 7456 | 0.00309673 | 23.15473197 |
| IL-17C | 12 | 52750252 | A | G | 0.1926 | 0.0401 | 0.0286 | 1.56E-06 | rs554604740 | 11149 | 0.002064858 | 23.06459887 |
| IL-17C | 13 | 44396409 | A | G | -0.0816 | 0.0171 | 0.8025 | 1.82E-06 | rs10870773 | 11345 | 0.002003147 | 22.76729992 |
| IL-17C | 13 | 96638651 | T | C | -0.0857 | 0.018 | 0.1597 | 1.93E-06 | rs12863903 | 11345 | 0.001994092 | 22.66418286 |
| IL-17C | 14 | 92763907 | C | G | -0.1162 | 0.0253 | 0.0991 | 4.37E-06 | rs8015296 | 9461 | 0.002224677 | 21.0901368 |
| IL-17C | 14 | 102333234 | T | C | 0.1091 | 0.0236 | 0.0906 | 3.78E-06 | rs12895022 | 11774 | 0.001811815 | 21.36740182 |
| IL-17C | 16 | 8393906 | C | G | 0.1077 | 0.0227 | 0.1032 | 2.09E-06 | rs39779 | 11345 | 0.001980224 | 22.50624924 |
| IL-17C | 16 | 76626873 | C | G | -0.09 | 0.0195 | 0.1382 | 3.92E-06 | rs12445031 | 11339 | 0.001875106 | 21.29801789 |
| IL-17C | 16 | 88684495 | T | G | -0.105 | 0.0136 | 0.3783 | 1.16E-14 | rs17700884 | 11775 | 0.00503671 | 59.59735829 |
| IL-18 | 2 | 32489851 | T | C | -0.1857 | 0.0123 | 0.3734 | 1.68E-51 | rs385076 | 14296 | 0.015693841 | 227.9044593 |
| IL-18 | 2 | 126751021 | T | C | -0.0702 | 0.0153 | 0.7336 | 4.47E-06 | rs12711729 | 11345 | 0.001852174 | 21.04819189 |
| IL-18 | 3 | 115001900 | A | T | -0.3049 | 0.0604 | 0.989 | 4.46E-07 | rs139760701 | 13809 | 0.001841951 | 25.47874702 |
| IL-18 | 4 | 121893301 | A | G | 0.072 | 0.0146 | 0.8077 | 8.16E-07 | rs12648080 | 14743 | 0.001646863 | 24.31646064 |
| IL-18 | 5 | 68682536 | A | C | -0.16 | 0.0267 | 0.9351 | 2.07E-09 | rs17229943 | 14744 | 0.002429661 | 35.90529731 |
| IL-18 | 5 | 70375337 | T | G | 0.1154 | 0.0252 | 0.8692 | 4.66E-06 | rs567093451 | 10894 | 0.001921268 | 20.9667346 |
| IL-18 | 6 | 38300402 | A | G | 0.2157 | 0.0461 | 0.0204 | 2.88E-06 | rs4140444 | 14741 | 0.001482952 | 21.88968501 |
| IL-18 | 6 | 158786921 | T | C | -0.0861 | 0.0181 | 0.2688 | 1.97E-06 | rs7755771 | 10893 | 0.002073005 | 22.62400081 |
| IL-18 | 6 | 162785078 | A | T | 0.0676 | 0.0138 | 0.2767 | 9.65E-07 | rs12201187 | 13245 | 0.001808411 | 23.99217583 |
| IL-18 | 7 | 11104167 | T | G | -0.082 | 0.0165 | 0.8341 | 6.71E-07 | rs67424072 | 14296 | 0.001724629 | 24.69443275 |
| IL-18 | 7 | 155637974 | T | C | -0.163 | 0.0301 | 0.0477 | 6.12E-08 | rs56836641 | 14743 | 0.00198515 | 29.32130519 |
| IL-18 | 8 | 126402485 | T | C | -0.0759 | 0.0156 | 0.3451 | 1.14E-06 | rs2954016 | 13421 | 0.001760695 | 23.66843985 |
| IL-18 | 8 | 144606172 | C | G | -0.0935 | 0.0157 | 0.8179 | 2.59E-09 | rs12681624 | 13657 | 0.002590253 | 35.4617621 |
| IL-18 | 9 | 20069041 | A | C | -0.1954 | 0.0425 | 0.0236 | 4.27E-06 | rs112338272 | 14721 | 0.001433873 | 21.13548661 |
| IL-18 | 11 | 268430 | C | G | -0.0629 | 0.0137 | 0.7543 | 4.41E-06 | rs11605127 | 14730 | 0.001429014 | 21.07663066 |
| IL-18 | 11 | 86686181 | C | G | -0.1248 | 0.0259 | 0.0665 | 1.45E-06 | rs57954386 | 12201 | 0.001899366 | 23.21445256 |
| IL-18 | 11 | 105060888 | T | C | 0.1154 | 0.0225 | 0.9237 | 2.91E-07 | rs60235102 | 14722 | 0.001783629 | 26.3019276 |
| IL-18 | 11 | 112025306 | A | C | 0.2039 | 0.0135 | 0.7618 | 1.53E-51 | rs5744249 | 14742 | 0.015238478 | 228.090917 |
| IL-18 | 11 | 112433719 | T | C | 0.1374 | 0.0291 | 0.0465 | 2.34E-06 | rs35495214 | 14735 | 0.001510709 | 22.29094787 |
| IL-18 | 16 | 54161464 | A | C | 0.2532 | 0.0525 | 0.9857 | 1.42E-06 | rs148504635 | 14737 | 0.00157585 | 23.25679435 |
| IL-18 | 16 | 84730435 | C | G | -0.278 | 0.0581 | 0.9792 | 1.71E-06 | rs113552426 | 11249 | 0.002031143 | 22.89075438 |
| IL-18 | 18 | 28763724 | A | G | -0.2314 | 0.0472 | 0.9814 | 9.46E-07 | rs77994606 | 14743 | 0.001627606 | 24.0316612 |
| IL-18 | 19 | 5344989 | T | C | 0.0581 | 0.0126 | 0.3565 | 4.01E-06 | rs2108621 | 14296 | 0.001485085 | 21.25937109 |
| IL-18 | 20 | 51289816 | A | T | -0.0567 | 0.0124 | 0.371 | 4.82E-06 | rs1403742 | 14296 | 0.001460406 | 20.90556867 |
| IL-18R1 | 1 | 15404794 | A | G | 0.0921 | 0.0201 | 0.1213 | 4.60E-06 | rs7512350 | 11771 | 0.001780491 | 20.99197733 |
| IL-18R1 | 2 | 102637685 | C | G | 0.4727 | 0.0474 | 0.0198 | 2.01E-23 | rs78714574 | 14735 | 0.006704139 | 99.43873021 |
| IL-18R1 | 2 | 102880806 | C | G | 0.5302 | 0.0152 | 0.1737 | 1.00E-200 | rs55871806 | 14733 | 0.076284988 | 1216.55938 |
| IL-18R1 | 2 | 103166288 | T | C | -0.401 | 0.0142 | 0.1988 | 1.92E-175 | rs75366565 | 14735 | 0.051341866 | 797.3575396 |
| IL-18R1 | 2 | 103401780 | A | C | 0.3635 | 0.0303 | 0.0405 | 3.70E-33 | rs2732865 | 14743 | 0.0096676 | 143.901279 |
| IL-18R1 | 2 | 104530177 | A | C | 0.066 | 0.0135 | 0.5583 | 1.01E-06 | rs2570479 | 11345 | 0.002102335 | 23.89702104 |
| IL-18R1 | 3 | 10580281 | A | C | 0.0935 | 0.02 | 0.8764 | 2.94E-06 | rs7642750 | 11788 | 0.001850626 | 21.85191689 |
| IL-18R1 | 3 | 58414784 | A | G | -0.1646 | 0.0342 | 0.0317 | 1.49E-06 | rs35021151 | 14735 | 0.00156955 | 23.16053026 |
| IL-18R1 | 3 | 79589418 | A | G | -0.2015 | 0.042 | 0.9745 | 1.61E-06 | rs62257659 | 14727 | 0.001560483 | 23.01402268 |
| IL-18R1 | 3 | 146882115 | A | G | -0.0956 | 0.0196 | 0.8928 | 1.07E-06 | rs78199195 | 14295 | 0.001661488 | 23.78717545 |
| IL-18R1 | 6 | 801754 | A | C | 0.1039 | 0.0222 | 0.0787 | 2.87E-06 | rs78035061 | 14295 | 0.001529946 | 21.90102194 |
| IL-18R1 | 7 | 29690677 | A | G | -0.3006 | 0.0649 | 0.0131 | 3.63E-06 | rs117145942 | 13164 | 0.001627022 | 21.44976664 |
| IL-18R1 | 7 | 47517191 | A | G | 0.1408 | 0.0299 | 0.0468 | 2.49E-06 | rs80317525 | 14730 | 0.001503166 | 22.17195363 |
| IL-18R1 | 7 | 156048777 | T | C | -0.1045 | 0.022 | 0.0762 | 2.03E-06 | rs73176827 | 14733 | 0.001529084 | 22.55943715 |
| IL-18R1 | 8 | 28819417 | T | G | 0.1906 | 0.0387 | 0.9625 | 8.43E-07 | rs536613714 | 12193 | 0.00198541 | 24.25228259 |
| IL-18R1 | 10 | 61379709 | A | G | -0.1505 | 0.0313 | 0.0389 | 1.52E-06 | rs117195704 | 14730 | 0.001567114 | 23.11667426 |
| IL-18R1 | 14 | 20930038 | A | C | 0.0657 | 0.0142 | 0.7591 | 3.71E-06 | rs1760941 | 14295 | 0.001495271 | 21.40391829 |
| IL-18R1 | 14 | 94844947 | T | C | 0.2643 | 0.0445 | 0.0204 | 2.86E-09 | rs28929474 | 14743 | 0.00238699 | 35.27080606 |
| IL-18R1 | 16 | 87926882 | A | C | -0.1483 | 0.0317 | 0.0536 | 2.89E-06 | rs117599131 | 13231 | 0.001651404 | 21.88255983 |
| IL-18R1 | 17 | 64305051 | A | G | -0.3382 | 0.0378 | 0.9715 | 3.65E-19 | rs78357146 | 14743 | 0.005400401 | 80.03955907 |
| IL-18R1 | 20 | 51193977 | A | G | 0.073 | 0.0149 | 0.8157 | 9.62E-07 | rs34174304 | 14725 | 0.001627461 | 24.00016304 |
| IL-18R1 | 22 | 19662319 | T | C | -0.2754 | 0.056 | 0.9865 | 8.75E-07 | rs79097546 | 14256 | 0.001693628 | 24.18192588 |
| IL-18R1 | 22 | 34904594 | A | G | 0.2387 | 0.0512 | 0.9848 | 3.13E-06 | rs116935210 | 14733 | 0.001473104 | 21.73231327 |
| IL-1 alpha | 1 | 105113404 | T | C | 0.0783 | 0.0171 | 0.174 | 4.67E-06 | rs12047801 | 11785 | 0.001775946 | 20.96320079 |
| IL-1 alpha | 1 | 116784131 | A | G | 0.2658 | 0.0565 | 0.0186 | 2.55E-06 | rs115494443 | 10853 | 0.002035066 | 22.12753407 |
| IL-1 alpha | 2 | 170964850 | T | C | 0.2215 | 0.0469 | 0.0311 | 2.33E-06 | rs115602471 | 11340 | 0.001963068 | 22.30104293 |
| IL-1 alpha | 6 | 32586222 | A | G | -0.3263 | 0.0266 | 0.0799 | 1.36E-34 | rs11759846 | 11788 | 0.012604393 | 150.4517293 |
| IL-1 alpha | 6 | 32606006 | A | T | -0.3452 | 0.0647 | 0.0283 | 9.53E-08 | rs547199103 | 7943 | 0.003571041 | 28.45926281 |
| IL-1 alpha | 6 | 32656094 | T | C | -0.3251 | 0.0554 | 0.0358 | 4.40E-09 | rs13195317 | 11301 | 0.003037919 | 34.43004127 |
| IL-1 alpha | 7 | 89060931 | T | G | 0.131 | 0.0286 | 0.0604 | 4.64E-06 | rs10233998 | 11785 | 0.001777086 | 20.97668303 |
| IL-1 alpha | 8 | 89744017 | A | T | 0.2438 | 0.0524 | 0.9824 | 3.28E-06 | rs16886503 | 11786 | 0.001833333 | 21.64368107 |
| IL-1 alpha | 11 | 118755738 | A | G | 0.0754 | 0.0142 | 0.5264 | 1.10E-07 | rs523604 | 10290 | 0.002732513 | 28.18912424 |
| IL-1 alpha | 12 | 103893601 | A | T | -0.0982 | 0.0207 | 0.1141 | 2.10E-06 | rs7138836 | 11775 | 0.001907621 | 22.50134678 |
| IL-1 alpha | 12 | 114539621 | T | C | 0.062 | 0.013 | 0.5326 | 1.85E-06 | rs4767214 | 11772 | 0.001928449 | 22.74169778 |
| IL-1 alpha | 17 | 32073614 | T | C | 0.2176 | 0.0439 | 0.9755 | 7.17E-07 | rs117537822 | 11788 | 0.002079909 | 24.56490286 |
| IL-1 alpha | 17 | 53509585 | A | G | -0.0856 | 0.0187 | 0.8232 | 4.70E-06 | rs61098036 | 9891 | 0.002114 | 20.94963647 |
| IL-1 alpha | 18 | 308555 | A | G | 0.1116 | 0.0221 | 0.9015 | 4.42E-07 | rs11878153 | 11787 | 0.002158748 | 25.49588815 |
| IL-2 | 2 | 192579384 | A | G | 0.2016 | 0.0424 | 0.9733 | 1.99E-06 | rs79419497 | 11789 | 0.001913993 | 22.60349824 |
| IL-2 | 3 | 12396234 | T | C | 0.2095 | 0.0419 | 0.0287 | 5.73E-07 | rs142641125 | 11789 | 0.002116133 | 24.99575876 |
| IL-2 | 3 | 64865615 | T | C | -0.1048 | 0.0217 | 0.8961 | 1.37E-06 | rs77853517 | 11787 | 0.001974883 | 23.3200459 |
| IL-2 | 3 | 125991040 | A | T | 0.0854 | 0.0174 | 0.8293 | 9.20E-07 | rs7638939 | 11769 | 0.00204263 | 24.08482169 |
| IL-2 | 3 | 137247468 | T | C | 0.1737 | 0.038 | 0.039 | 4.85E-06 | rs75739108 | 11341 | 0.001839 | 20.89083738 |
| IL-2 | 4 | 34713434 | T | G | 0.1176 | 0.0255 | 0.9036 | 3.99E-06 | rs79925007 | 11341 | 0.001871842 | 21.264623 |
| IL-2 | 4 | 138235156 | T | G | -0.0646 | 0.0139 | 0.6861 | 3.36E-06 | rs6535212 | 11784 | 0.001829563 | 21.59542324 |
| IL-2 | 5 | 35188802 | T | C | -0.1216 | 0.026 | 0.9334 | 2.91E-06 | rs4703508 | 11789 | 0.001851989 | 21.86989862 |
| IL-2 | 9 | 88775115 | A | C | -0.1468 | 0.0309 | 0.9396 | 2.03E-06 | rs201229721 | 9257 | 0.002432245 | 22.56531039 |
| IL-2 | 10 | 2293803 | T | G | -0.1999 | 0.0431 | 0.0244 | 3.52E-06 | rs74852566 | 11789 | 0.001821387 | 21.50786807 |
| IL-2 | 10 | 67202938 | T | C | -0.1222 | 0.0259 | 0.9188 | 2.38E-06 | rs10996419 | 11784 | 0.001885517 | 22.2571303 |
| IL-2 | 13 | 85868678 | A | G | 0.1922 | 0.0414 | 0.0318 | 3.44E-06 | rs77832761 | 11785 | 0.001825505 | 21.5492607 |
| IL-2 | 14 | 55563894 | C | G | -0.2699 | 0.0576 | 0.9727 | 2.79E-06 | rs144129701 | 11341 | 0.001932277 | 21.95251119 |
| IL-2 | 16 | 77431739 | T | C | -0.0728 | 0.0153 | 0.7384 | 1.95E-06 | rs36006983 | 11341 | 0.001992335 | 22.6361885 |
| IL-2 | 17 | 103299 | A | C | -0.0723 | 0.0149 | 0.6969 | 1.22E-06 | rs28515912 | 10723 | 0.002190964 | 23.5408992 |
| IL-2 | 19 | 55502846 | C | G | -0.0849 | 0.017 | 0.2053 | 5.91E-07 | rs1671226 | 11341 | 0.002194381 | 24.93681266 |
| IL-20 | 1 | 9746065 | T | G | -0.1722 | 0.0376 | 0.0444 | 4.65E-06 | rs72633862 | 11774 | 0.001778253 | 20.97088827 |
| IL-20 | 1 | 41433965 | T | C | -0.2372 | 0.0487 | 0.0189 | 1.11E-06 | rs114363239 | 11782 | 0.002009458 | 23.7190734 |
| IL-20 | 2 | 52215130 | A | G | -0.2134 | 0.046 | 0.9756 | 3.50E-06 | rs114209791 | 11784 | 0.001823006 | 21.51787852 |
| IL-20 | 2 | 141913966 | T | C | -0.2551 | 0.0515 | 0.0228 | 7.29E-07 | rs146918864 | 11438 | 0.002140552 | 24.53186204 |
| IL-20 | 4 | 133183457 | A | G | 0.0635 | 0.0137 | 0.3202 | 3.57E-06 | rs12498781 | 11763 | 0.001823038 | 21.47991059 |
| IL-20 | 7 | 17753237 | T | C | 0.0719 | 0.0156 | 0.5043 | 4.05E-06 | rs143181662 | 8587 | 0.00246771 | 21.23769701 |
| IL-20 | 7 | 54991603 | A | G | 0.294 | 0.0596 | 0.9804 | 8.10E-07 | rs111249483 | 10849 | 0.002237894 | 24.32887754 |
| IL-20 | 7 | 76239511 | A | G | -0.3598 | 0.071 | 0.0177 | 4.03E-07 | rs200680034 | 8243 | 0.003105771 | 25.67439597 |
| IL-20 | 8 | 68839107 | A | G | -0.3596 | 0.0778 | 0.9909 | 3.80E-06 | rs138771212 | 11336 | 0.00188106 | 21.36011287 |
| IL-20 | 11 | 100596026 | T | C | -0.222 | 0.0427 | 0.0255 | 2.00E-07 | rs188205021 | 11774 | 0.0022905 | 27.02566697 |
| IL-20 | 14 | 21169862 | T | C | -0.1232 | 0.0267 | 0.9142 | 3.95E-06 | rs72659995 | 11336 | 0.001874667 | 21.28738251 |
| IL-20 | 15 | 23769949 | T | C | -0.1753 | 0.0372 | 0.965 | 2.45E-06 | rs28542561 | 11774 | 0.001882503 | 22.20261736 |
| IL-20 | 16 | 80689313 | T | G | -0.1546 | 0.0316 | 0.9553 | 9.96E-07 | rs117977288 | 11784 | 0.00202708 | 23.93156491 |
| IL-20RA | 1 | 153082377 | A | C | -0.0817 | 0.0155 | 0.4221 | 1.36E-07 | rs540645152 | 8814 | 0.003142251 | 27.77679662 |
| IL-20RA | 1 | 168180874 | C | G | 0.119 | 0.0256 | 0.1039 | 3.34E-06 | rs12138611 | 11344 | 0.001901172 | 21.60416161 |
| IL-20RA | 3 | 113013852 | A | G | 0.3626 | 0.075 | 0.0114 | 1.33E-06 | rs544388667 | 9261 | 0.002517564 | 23.36895394 |
| IL-20RA | 5 | 46131995 | T | C | -0.4166 | 0.091 | 0.0114 | 4.69E-06 | rs143067549 | 7315 | 0.002856925 | 20.95255501 |
| IL-20RA | 5 | 154577444 | A | G | 0.1741 | 0.038 | 0.0321 | 4.61E-06 | rs59446445 | 11790 | 0.001777232 | 20.98730486 |
| IL-20RA | 6 | 158071161 | A | G | -0.0664 | 0.0144 | 0.704 | 4.01E-06 | rs6920753 | 11762 | 0.001804453 | 21.25873025 |
| IL-20RA | 7 | 12560554 | A | T | 0.3176 | 0.0676 | 0.9871 | 2.62E-06 | rs113563938 | 11344 | 0.001942035 | 22.06942513 |
| IL-20RA | 8 | 35154239 | A | G | 0.1171 | 0.0198 | 0.1374 | 3.34E-09 | rs11987533 | 11344 | 0.003073832 | 34.97090205 |
| IL-20RA | 8 | 79840734 | T | G | -0.0761 | 0.0166 | 0.7494 | 4.55E-06 | rs12056343 | 9894 | 0.002119628 | 21.01190067 |
| IL-20RA | 8 | 139987300 | A | G | 0.1913 | 0.0407 | 0.972 | 2.60E-06 | rs113153423 | 11792 | 0.001869996 | 22.08856264 |
| IL-20RA | 16 | 14288564 | T | C | 0.0897 | 0.0195 | 0.8313 | 4.22E-06 | rs72785422 | 11343 | 0.001861994 | 21.15626906 |
| IL-20RA | 17 | 59389022 | A | G | 0.2357 | 0.0511 | 0.0208 | 3.98E-06 | rs149111746 | 11783 | 0.001802345 | 21.27177071 |
| IL-22RA1 | 2 | 85320044 | T | C | -0.1271 | 0.0273 | 0.0671 | 3.23E-06 | rs78594373 | 11767 | 0.001838657 | 21.67165035 |
| IL-22RA1 | 4 | 26143082 | A | C | 0.2679 | 0.0561 | 0.0253 | 1.79E-06 | rs1473089 | 10916 | 0.00208473 | 22.8002772 |
| IL-22RA1 | 4 | 157031745 | A | G | 0.1722 | 0.037 | 0.0376 | 3.25E-06 | rs75590335 | 11345 | 0.001905592 | 21.65640068 |
| IL-22RA1 | 7 | 81154741 | A | T | -0.2102 | 0.0412 | 0.9695 | 3.36E-07 | rs79229049 | 11781 | 0.002204603 | 26.02539065 |
| IL-22RA1 | 8 | 81502336 | A | G | 0.2815 | 0.0571 | 0.0165 | 8.23E-07 | rs56282088 | 10919 | 0.002220936 | 24.2999302 |
| IL-22RA1 | 8 | 87485765 | T | C | 0.2714 | 0.0584 | 0.0167 | 3.36E-06 | rs13257574 | 11306 | 0.001906585 | 21.5932076 |
| IL-22RA1 | 9 | 117667449 | T | C | 0.27 | 0.0582 | 0.0163 | 3.50E-06 | rs3181361 | 11345 | 0.001893451 | 21.51815299 |
| IL-22RA1 | 10 | 44669337 | A | G | 0.2203 | 0.047 | 0.9713 | 2.77E-06 | rs12240324 | 11793 | 0.001859519 | 21.966437 |
| IL-22RA1 | 14 | 62394907 | T | C | -0.0751 | 0.0162 | 0.7694 | 3.56E-06 | rs17256492 | 11345 | 0.001890704 | 21.48687596 |
| IL-22RA1 | 14 | 94197473 | A | G | -0.0674 | 0.0138 | 0.6092 | 1.04E-06 | rs7158900 | 11344 | 0.002098375 | 23.84981669 |
| IL-22RA1 | 20 | 50001752 | T | C | 0.0632 | 0.0134 | 0.5504 | 2.40E-06 | rs4811167 | 11793 | 0.001882703 | 22.2408254 |
| IL-22RA1 | 21 | 42295154 | A | G | 0.3467 | 0.0752 | 0.0109 | 4.02E-06 | rs117263973 | 10858 | 0.001953767 | 21.25161793 |
| IL-24 | 1 | 18931322 | T | C | 0.1729 | 0.0371 | 0.0521 | 3.16E-06 | rs116790447 | 9453 | 0.002292323 | 21.71452194 |
| IL-24 | 1 | 153060770 | A | T | 0.0762 | 0.0162 | 0.4768 | 2.55E-06 | rs199770642 | 7943 | 0.002777713 | 22.11925763 |
| IL-24 | 1 | 236592040 | T | C | 0.0815 | 0.0172 | 0.4915 | 2.15E-06 | rs36183478 | 8587 | 0.002607851 | 22.44694075 |
| IL-24 | 5 | 149232308 | A | G | -0.1318 | 0.028 | 0.0716 | 2.51E-06 | rs2341294 | 9900 | 0.002233102 | 22.15271768 |
| IL-24 | 7 | 9959098 | A | T | 0.3063 | 0.0647 | 0.014 | 2.20E-06 | rs145295031 | 11287 | 0.001981734 | 22.40827732 |
| IL-24 | 7 | 155623090 | A | G | 0.0657 | 0.0136 | 0.4443 | 1.36E-06 | rs167018 | 11336 | 0.002054471 | 23.33330691 |
| IL-24 | 10 | 6122343 | A | G | 0.3005 | 0.0641 | 0.0145 | 2.76E-06 | rs11256610 | 10850 | 0.002021456 | 21.97317588 |
| IL-24 | 12 | 112883476 | A | G | 0.0655 | 0.0137 | 0.4172 | 1.74E-06 | rs11066309 | 11336 | 0.002012365 | 22.85413754 |
| IL-24 | 14 | 86024172 | A | T | 0.0892 | 0.0195 | 0.2392 | 4.78E-06 | rs7401175 | 7943 | 0.002627443 | 20.9194913 |
| IL-24 | 14 | 97741799 | A | G | -0.3 | 0.0657 | 0.9862 | 4.97E-06 | rs117613902 | 10850 | 0.001917998 | 20.84643081 |
| IL-24 | 16 | 49575164 | A | G | -0.0886 | 0.0191 | 0.1398 | 3.51E-06 | rs60306270 | 11781 | 0.001823165 | 21.51428786 |
| IL-24 | 21 | 26067535 | A | G | 0.2969 | 0.0644 | 0.0144 | 4.02E-06 | rs143986178 | 10850 | 0.0019551 | 21.25047288 |
| IL-24 | 22 | 48661109 | A | G | 0.111 | 0.0207 | 0.1327 | 8.22E-08 | rs73169406 | 11337 | 0.002529921 | 28.74939067 |
| IL-2RB | 2 | 31896839 | T | C | 0.2769 | 0.0557 | 0.9745 | 6.65E-07 | rs13001788 | 8243 | 0.002989166 | 24.70757575 |
| IL-2RB | 2 | 171243489 | A | G | 0.232 | 0.0502 | 0.9786 | 3.81E-06 | rs115890206 | 10403 | 0.002048893 | 21.35428494 |
| IL-2RB | 4 | 108118301 | T | C | 0.0631 | 0.0129 | 0.5622 | 1.00E-06 | rs17549820 | 11791 | 0.002025108 | 23.92244838 |
| IL-2RB | 4 | 136755243 | A | G | -0.2101 | 0.0441 | 0.025 | 1.90E-06 | rs116007066 | 10295 | 0.002199845 | 22.69292865 |
| IL-2RB | 6 | 131393771 | A | C | -0.157 | 0.0325 | 0.9549 | 1.36E-06 | rs9321271 | 11779 | 0.001977264 | 23.332369 |
| IL-2RB | 7 | 98121843 | C | G | 0.0704 | 0.0144 | 0.346 | 1.01E-06 | rs1472270 | 11344 | 0.00210252 | 23.89702067 |
| IL-2RB | 11 | 36198233 | T | C | -0.0721 | 0.0156 | 0.2619 | 3.80E-06 | rs34246740 | 11344 | 0.001879482 | 21.3572218 |
| IL-2RB | 11 | 40470032 | T | C | -0.2471 | 0.0535 | 0.9783 | 3.86E-06 | rs141460846 | 11304 | 0.001883593 | 21.3285377 |
| IL-2RB | 12 | 13099229 | T | C | -0.0984 | 0.021 | 0.7599 | 2.79E-06 | rs56353341 | 7943 | 0.002756565 | 21.95039 |
| IL-2RB | 12 | 111592380 | T | G | -0.1133 | 0.0239 | 0.0879 | 2.13E-06 | rs2157876 | 11343 | 0.001977318 | 22.46919101 |
| IL-2RB | 13 | 106109408 | A | T | 0.3764 | 0.0809 | 0.0166 | 3.28E-06 | rs559991994 | 7943 | 0.002717914 | 21.64177212 |
| IL-2RB | 15 | 84665328 | T | C | -0.2102 | 0.0443 | 0.9766 | 2.09E-06 | rs11630708 | 11788 | 0.001906291 | 22.51045537 |
| IL-2RB | 16 | 80775714 | A | G | -0.0606 | 0.0128 | 0.4465 | 2.20E-06 | rs9921181 | 11786 | 0.001898164 | 22.41050309 |
| IL-2RB | 17 | 4507431 | T | C | 0.1213 | 0.0261 | 0.0695 | 3.36E-06 | rs117538197 | 11774 | 0.001831136 | 21.59567629 |
| IL-33 | 4 | 189492967 | T | G | 0.1741 | 0.0364 | 0.047 | 1.73E-06 | rs35370544 | 8385 | 0.002720874 | 22.87131704 |
| IL-33 | 6 | 38719850 | C | G | 0.0691 | 0.0148 | 0.6997 | 3.03E-06 | rs7742625 | 11345 | 0.001917761 | 21.79496098 |
| IL-33 | 6 | 156872261 | T | C | -0.1166 | 0.0255 | 0.1064 | 4.82E-06 | rs77792454 | 8817 | 0.002365741 | 20.90346183 |
| IL-33 | 7 | 24423445 | C | G | 0.1833 | 0.04 | 0.0307 | 4.59E-06 | rs17149396 | 11789 | 0.001778095 | 20.99574372 |
| IL-33 | 8 | 87995921 | A | G | -0.0752 | 0.0162 | 0.2321 | 3.45E-06 | rs66755903 | 11345 | 0.001895733 | 21.5441361 |
| IL-33 | 9 | 21663051 | C | G | 0.1308 | 0.0277 | 0.9172 | 2.34E-06 | rs62556318 | 11345 | 0.001961547 | 22.29355776 |
| IL-33 | 12 | 96439814 | A | G | 0.1259 | 0.0273 | 0.9273 | 3.99E-06 | rs78455659 | 11345 | 0.001871149 | 21.26422691 |
| IL-33 | 15 | 66970271 | T | C | -0.0681 | 0.0135 | 0.5496 | 4.55E-07 | rs8042883 | 11345 | 0.002237944 | 25.44193383 |
| IL-33 | 16 | 79491576 | A | C | 0.0936 | 0.0203 | 0.8755 | 4.01E-06 | rs13336496 | 11780 | 0.001801487 | 21.25621241 |
| IL-33 | 18 | 73359115 | A | G | 0.3432 | 0.0748 | 0.0112 | 4.47E-06 | rs112495884 | 10858 | 0.001935086 | 21.04802544 |
| IL-33 | 19 | 14299739 | A | C | -0.1184 | 0.0233 | 0.1177 | 3.74E-07 | rs10415966 | 10281 | 0.002505341 | 25.81707698 |
| IL-33 | 21 | 40484010 | T | C | -0.0732 | 0.0158 | 0.2201 | 3.61E-06 | rs1013434 | 11783 | 0.001818284 | 21.46022478 |
| IL-4 | 1 | 145427960 | C | G | 0.1919 | 0.0417 | 0.0407 | 4.19E-06 | rs10910814 | 7953 | 0.002655779 | 21.17232786 |
| IL-4 | 1 | 243071390 | T | C | -0.077 | 0.0167 | 0.2195 | 4.01E-06 | rs2502347 | 11345 | 0.001870385 | 21.25553007 |
| IL-4 | 2 | 107668175 | A | G | 0.0701 | 0.0153 | 0.7233 | 4.61E-06 | rs13418255 | 11345 | 0.00184691 | 20.98826825 |
| IL-4 | 4 | 40156881 | A | G | -0.0773 | 0.0159 | 0.2374 | 1.16E-06 | rs13130198 | 11345 | 0.002079009 | 23.63133033 |
| IL-4 | 4 | 185529634 | C | G | -0.1181 | 0.025 | 0.9065 | 2.31E-06 | rs12641440 | 11345 | 0.001963188 | 22.3122419 |
| IL-4 | 6 | 32556783 | T | C | 0.1212 | 0.0255 | 0.1501 | 2.00E-06 | rs9270229 | 6252 | 0.003600307 | 22.5832232 |
| IL-4 | 6 | 35764540 | A | G | 0.085 | 0.0179 | 0.5892 | 2.05E-06 | rs2766594 | 7943 | 0.002830845 | 22.54355603 |
| IL-4 | 7 | 2938066 | A | T | 0.449 | 0.0914 | 0.9882 | 8.99E-07 | rs549453778 | 7456 | 0.003226198 | 24.12591423 |
| IL-4 | 8 | 22649912 | A | G | 0.0678 | 0.0136 | 0.5982 | 6.19E-07 | rs11989681 | 11345 | 0.002185882 | 24.8487761 |
| IL-4 | 8 | 119274249 | T | G | -0.1391 | 0.0299 | 0.9451 | 3.28E-06 | rs4876407 | 11788 | 0.001832631 | 21.63905012 |
| IL-4 | 9 | 117036047 | T | G | -0.1338 | 0.0278 | 0.0752 | 1.49E-06 | rs1490743 | 10281 | 0.00224807 | 23.15997797 |
| IL-4 | 10 | 6800809 | T | C | -0.2354 | 0.045 | 0.0253 | 1.68E-07 | rs75610895 | 11787 | 0.002316208 | 27.35988029 |
| IL-4 | 10 | 34284406 | A | G | 0.2805 | 0.0592 | 0.9846 | 2.16E-06 | rs116963481 | 11793 | 0.001900081 | 22.44650134 |
| IL-4 | 14 | 106921396 | T | C | -0.1128 | 0.0244 | 0.7641 | 3.78E-06 | rs7150107 | 8099 | 0.002631859 | 21.36639667 |
| IL-4 | 15 | 79066932 | A | G | 0.0716 | 0.0152 | 0.4842 | 2.47E-06 | rs12900168 | 10471 | 0.002114615 | 22.18481998 |
| IL-5 | 1 | 37473314 | T | C | 0.1661 | 0.0361 | 0.0436 | 4.20E-06 | rs114829303 | 11344 | 0.001862726 | 21.16646273 |
| IL-5 | 1 | 208050360 | A | G | -0.1169 | 0.0236 | 0.0881 | 7.29E-07 | rs17009223 | 11789 | 0.002076946 | 24.53190828 |
| IL-5 | 4 | 35700630 | T | G | 0.205 | 0.0424 | 0.0508 | 1.33E-06 | rs534010680 | 7942 | 0.002934741 | 23.37042599 |
| IL-5 | 5 | 95530542 | A | G | 0.0765 | 0.0147 | 0.7289 | 1.95E-07 | rs34639000 | 11773 | 0.002295108 | 27.07786486 |
| IL-5 | 6 | 124474284 | A | G | 0.3833 | 0.0825 | 0.9859 | 3.38E-06 | rs141941146 | 10280 | 0.002095394 | 21.58167957 |
| IL-5 | 9 | 132281601 | A | G | 0.0777 | 0.0167 | 0.2002 | 3.28E-06 | rs10988407 | 11791 | 0.001832575 | 21.64389526 |
| IL-5 | 10 | 4740043 | T | G | -0.1939 | 0.0424 | 0.947 | 4.81E-06 | rs201180858 | 7943 | 0.002626016 | 20.90809855 |
| IL-5 | 11 | 10380223 | A | G | -0.2747 | 0.0592 | 0.9858 | 3.48E-06 | rs4277106 | 11790 | 0.00182292 | 21.52782862 |
| IL-5 | 13 | 78234635 | A | C | -0.2292 | 0.0499 | 0.0477 | 4.37E-06 | rs12864018 | 7943 | 0.002649059 | 21.09204887 |
| IL-5 | 14 | 93316119 | A | G | -0.0924 | 0.0188 | 0.1442 | 8.88E-07 | rs7142197 | 11773 | 0.002047627 | 24.15207561 |
| IL-5 | 15 | 70546132 | T | C | 0.0838 | 0.0173 | 0.8068 | 1.27E-06 | rs12592185 | 11344 | 0.002064107 | 23.45952725 |
| IL-5 | 16 | 86933894 | C | G | 0.2407 | 0.0521 | 0.0351 | 3.84E-06 | rs7193141 | 9377 | 0.002271043 | 21.33949287 |
| IL-5 | 17 | 59402478 | A | G | 0.2206 | 0.0482 | 0.0267 | 4.72E-06 | rs62069649 | 10431 | 0.002004102 | 20.94274775 |
| IL-5 | 22 | 48143913 | T | C | -0.0686 | 0.0141 | 0.3408 | 1.14E-06 | rs132210 | 11344 | 0.002082277 | 23.66646707 |
| IL-6 | 1 | 154426970 | A | C | -0.1684 | 0.0119 | 0.6128 | 1.83E-45 | rs2228145 | 14742 | 0.013402136 | 200.2310055 |
| IL-6 | 2 | 113871806 | T | G | 0.0975 | 0.0211 | 0.9152 | 3.82E-06 | rs17486819 | 14739 | 0.001446597 | 21.34938581 |
| IL-6 | 5 | 141146747 | T | G | -0.0671 | 0.0143 | 0.2276 | 2.70E-06 | rs248536 | 14295 | 0.001537873 | 22.014671 |
| IL-6 | 6 | 32609094 | T | C | 0.067 | 0.0131 | 0.291 | 3.15E-07 | rs550717566 | 14294 | 0.001826666 | 26.15448927 |
| IL-6 | 7 | 28486167 | T | C | 0.0582 | 0.0127 | 0.6371 | 4.59E-06 | rs10234370 | 14295 | 0.001466955 | 20.99799178 |
| IL-6 | 7 | 76792340 | T | C | -0.2244 | 0.0469 | 0.0182 | 1.71E-06 | rs187416244 | 14726 | 0.001552175 | 22.8897491 |
| IL-6 | 8 | 21260780 | A | G | -0.0659 | 0.0135 | 0.7459 | 1.05E-06 | rs1346147 | 14295 | 0.001664163 | 23.82552758 |
| IL-6 | 9 | 954741 | A | C | -0.3418 | 0.0701 | 0.9865 | 1.08E-06 | rs10977774 | 12312 | 0.001927266 | 23.77045676 |
| IL-6 | 10 | 79656931 | T | C | -0.2313 | 0.0484 | 0.9602 | 1.76E-06 | rs554155854 | 9830 | 0.002317924 | 22.83348346 |
| IL-6 | 13 | 68942611 | T | G | -0.3427 | 0.0682 | 0.0105 | 5.04E-07 | rs185969953 | 12934 | 0.001948407 | 25.24598378 |
| IL-6 | 14 | 77078350 | A | T | 0.1165 | 0.0244 | 0.118 | 1.80E-06 | rs1642826 | 10893 | 0.002088415 | 22.79252566 |
| IL-7 | 1 | 97287518 | A | C | 0.2512 | 0.0531 | 0.9836 | 2.24E-06 | rs77336315 | 13801 | 0.00161896 | 22.37624903 |
| IL-7 | 1 | 174141356 | A | G | 0.097 | 0.021 | 0.8744 | 3.86E-06 | rs56889120 | 11340 | 0.001877913 | 21.33183801 |
| IL-7 | 1 | 194276216 | A | G | 0.1372 | 0.0274 | 0.9451 | 5.52E-07 | rs74131483 | 13240 | 0.001890155 | 25.06925851 |
| IL-7 | 3 | 35502404 | T | C | 0.1495 | 0.0316 | 0.0436 | 2.23E-06 | rs144728120 | 14717 | 0.001518549 | 22.37943905 |
| IL-7 | 4 | 147865967 | A | T | 0.1597 | 0.0345 | 0.9615 | 3.67E-06 | rs576004227 | 12045 | 0.001775795 | 21.42394892 |
| IL-7 | 5 | 35881376 | T | G | -0.0647 | 0.0131 | 0.2796 | 7.86E-07 | rs11742240 | 14736 | 0.001652601 | 24.38973169 |
| IL-7 | 5 | 131676320 | T | C | -0.0651 | 0.0133 | 0.4122 | 9.84E-07 | rs1050152 | 11785 | 0.002028837 | 23.95438283 |
| IL-7 | 5 | 133897234 | A | G | 0.0729 | 0.0159 | 0.7913 | 4.54E-06 | rs55849454 | 12202 | 0.001719817 | 21.01791435 |
| IL-7 | 7 | 2401569 | A | G | 0.068 | 0.0138 | 0.2517 | 8.33E-07 | rs12699881 | 14288 | 0.001696488 | 24.27721457 |
| IL-7 | 8 | 79713766 | A | G | 0.1691 | 0.0225 | 0.9 | 5.67E-14 | rs112359206 | 10894 | 0.00515809 | 56.47320564 |
| IL-7 | 8 | 106546447 | T | C | 0.0745 | 0.014 | 0.3642 | 1.03E-07 | rs111066336 | 11538 | 0.002448282 | 28.31269346 |
| IL-7 | 9 | 133854336 | A | G | 0.0691 | 0.0148 | 0.5682 | 3.03E-06 | rs7026771 | 12403 | 0.001754459 | 21.79528879 |
| IL-7 | 12 | 97807415 | A | G | 0.0698 | 0.0139 | 0.237 | 5.12E-07 | rs12321566 | 14287 | 0.001761872 | 25.21276319 |
| IL-7 | 15 | 73960703 | T | C | -0.2336 | 0.0505 | 0.0215 | 3.73E-06 | rs570880779 | 13605 | 0.001570297 | 21.39434883 |
| IL-7 | 15 | 81321256 | T | C | -0.136 | 0.028 | 0.0497 | 1.19E-06 | rs79072837 | 14715 | 0.001600685 | 23.58863023 |
| IL-7 | 19 | 14764810 | A | G | -0.0584 | 0.0127 | 0.2923 | 4.26E-06 | rs10403201 | 14730 | 0.001433483 | 21.14264321 |
| IL-8 | 1 | 159175354 | A | G | 0.0667 | 0.0116 | 0.5552 | 8.92E-09 | rs12075 | 14741 | 0.002237875 | 33.05801421 |
| IL-8 | 1 | 233542010 | T | C | 0.3186 | 0.0622 | 0.9879 | 3.02E-07 | rs144815207 | 13394 | 0.001955017 | 26.2328768 |
| IL-8 | 2 | 108946178 | A | G | 0.0562 | 0.0117 | 0.4424 | 1.56E-06 | rs6709159 | 14744 | 0.001562451 | 23.06970241 |
| IL-8 | 3 | 16705058 | T | C | 0.056 | 0.012 | 0.4104 | 3.06E-06 | rs13064825 | 14296 | 0.001521031 | 21.77473108 |
| IL-8 | 3 | 76218188 | T | C | 0.1479 | 0.0322 | 0.0386 | 4.37E-06 | rs1516478 | 14741 | 0.001429146 | 21.09432716 |
| IL-8 | 3 | 172877373 | T | C | 0.2829 | 0.0608 | 0.0146 | 3.27E-06 | rs141979722 | 11669 | 0.001851911 | 21.64633097 |
| IL-8 | 4 | 74574265 | A | G | -0.1894 | 0.0241 | 0.0665 | 3.87E-15 | rs6446951 | 14729 | 0.004175758 | 61.75425529 |
| IL-8 | 5 | 37903927 | A | C | -0.0936 | 0.0184 | 0.1404 | 3.64E-07 | rs972492 | 12412 | 0.00208051 | 25.87295696 |
| IL-8 | 5 | 120608739 | A | T | -0.0755 | 0.0147 | 0.2006 | 2.81E-07 | rs12188297 | 14740 | 0.001786427 | 26.37547578 |
| IL-8 | 7 | 17688229 | A | G | 0.2687 | 0.0555 | 0.9866 | 1.29E-06 | rs145125644 | 14733 | 0.001588429 | 23.43637332 |
| IL-8 | 10 | 118629449 | T | C | 0.1545 | 0.0325 | 0.9598 | 2.00E-06 | rs6585420 | 14744 | 0.001530417 | 22.59598773 |
| IL-8 | 15 | 101649801 | A | C | 0.0574 | 0.0124 | 0.4025 | 3.67E-06 | rs72633250 | 14296 | 0.001496633 | 21.42494189 |
| IL-8 | 17 | 54450134 | A | G | 0.0668 | 0.0131 | 0.7222 | 3.41E-07 | rs8069322 | 14726 | 0.001762623 | 25.99868285 |
| IL-8 | 17 | 73572798 | A | G | -0.1324 | 0.0279 | 0.0541 | 2.08E-06 | rs7216538 | 13672 | 0.00164445 | 22.51666303 |
| IL-8 | 18 | 12258051 | T | C | 0.0555 | 0.012 | 0.5073 | 3.75E-06 | rs34519991 | 14296 | 0.001494031 | 21.38763247 |
| IL-8 | 18 | 36692976 | T | G | -0.3895 | 0.076 | 0.0095 | 2.98E-07 | rs72886502 | 12291 | 0.002132423 | 26.26135104 |
| IL-8 | 18 | 73700336 | T | C | 0.0941 | 0.02 | 0.9034 | 2.54E-06 | rs906401 | 14729 | 0.0015007 | 22.13401909 |
| LAP TGF-beta-1 | 2 | 107310081 | A | G | -0.0849 | 0.0183 | 0.8857 | 3.50E-06 | rs7570818 | 14729 | 0.00145917 | 21.52059258 |
| LAP TGF-beta-1 | 4 | 5793052 | A | T | 0.0626 | 0.0121 | 0.5957 | 2.30E-07 | rs7656674 | 14288 | 0.001869794 | 26.76191149 |
| LAP TGF-beta-1 | 4 | 26142254 | C | G | 0.2053 | 0.0433 | 0.9689 | 2.12E-06 | rs73112514 | 12393 | 0.001810667 | 22.47667227 |
| LAP TGF-beta-1 | 4 | 84952443 | A | C | 0.1265 | 0.0263 | 0.9391 | 1.51E-06 | rs1921885 | 14288 | 0.001616574 | 23.13176429 |
| LAP TGF-beta-1 | 4 | 175537640 | T | C | -0.299 | 0.0613 | 0.0112 | 1.07E-06 | rs114152855 | 14249 | 0.001666911 | 23.78813889 |
| LAP TGF-beta-1 | 5 | 131705458 | C | G | -0.0605 | 0.013 | 0.4529 | 3.26E-06 | rs2631367 | 11785 | 0.001834413 | 21.65460846 |
| LAP TGF-beta-1 | 7 | 16406570 | T | C | -0.0931 | 0.0199 | 0.1103 | 2.89E-06 | rs34992551 | 14734 | 0.001483296 | 21.88438033 |
| LAP TGF-beta-1 | 8 | 51696312 | T | C | 0.1447 | 0.0303 | 0.0388 | 1.79E-06 | rs143420877 | 14729 | 0.00154599 | 22.80304424 |
| LAP TGF-beta-1 | 8 | 68719454 | T | C | -0.0747 | 0.0155 | 0.8321 | 1.44E-06 | rs7820135 | 14730 | 0.001574312 | 23.22302747 |
| LAP TGF-beta-1 | 8 | 106593558 | A | G | -0.0608 | 0.0121 | 0.4469 | 5.04E-07 | rs7013321 | 14288 | 0.001763998 | 25.24501437 |
| LAP TGF-beta-1 | 9 | 87111083 | T | G | 0.2185 | 0.0461 | 0.0182 | 2.14E-06 | rs183319799 | 14733 | 0.001522468 | 22.46167155 |
| LAP TGF-beta-1 | 10 | 18285342 | T | C | 0.0523 | 0.0114 | 0.4627 | 4.48E-06 | rs10508556 | 14735 | 0.001426342 | 21.0443116 |
| LAP TGF-beta-1 | 11 | 95274487 | T | G | 0.0989 | 0.021 | 0.9023 | 2.48E-06 | rs34536806 | 14288 | 0.001549919 | 22.17650986 |
| LAP TGF-beta-1 | 12 | 24809427 | T | C | -0.2662 | 0.0526 | 0.0227 | 4.17E-07 | rs144834546 | 12935 | 0.001976146 | 25.60810598 |
| LAP TGF-beta-1 | 12 | 95312882 | A | C | -0.1083 | 0.0232 | 0.0779 | 3.04E-06 | rs60821320 | 12852 | 0.001692679 | 21.78779871 |
| LAP TGF-beta-1 | 16 | 48902293 | A | C | -0.2301 | 0.0472 | 0.0182 | 1.09E-06 | rs149458216 | 14726 | 0.001611254 | 23.76239729 |
| LAP TGF-beta-1 | 19 | 14764810 | A | G | -0.0597 | 0.0125 | 0.292 | 1.79E-06 | rs10403201 | 14730 | 0.001546158 | 22.8070789 |
| LAP TGF-beta-1 | 19 | 41811072 | A | G | -0.1921 | 0.0276 | 0.9378 | 3.40E-12 | rs73045256 | 14288 | 0.003379054 | 48.43683639 |
| LAP TGF-beta-1 | 19 | 41847860 | A | G | -0.4623 | 0.0335 | 0.0345 | 2.55E-43 | rs1800472 | 14736 | 0.012758568 | 190.4141531 |
| LAP TGF-beta-1 | 19 | 41981195 | T | C | 0.1378 | 0.0271 | 0.0525 | 3.68E-07 | rs7247630 | 14729 | 0.001752366 | 25.85240066 |
| LAP TGF-beta-1 | 22 | 45002724 | T | C | -0.0873 | 0.019 | 0.1204 | 4.33E-06 | rs2281119 | 14284 | 0.001475809 | 21.10865067 |
| LIF | 2 | 3091471 | T | C | 0.0707 | 0.0153 | 0.3559 | 3.82E-06 | rs11127419 | 9252 | 0.002302604 | 21.3482399 |
| LIF | 2 | 46125903 | A | T | 0.0993 | 0.0213 | 0.8758 | 3.13E-06 | rs80092539 | 11345 | 0.001912069 | 21.73014989 |
| LIF | 2 | 222585468 | A | G | -0.2119 | 0.0453 | 0.0321 | 2.90E-06 | rs825264 | 10291 | 0.002121707 | 21.87666409 |
| LIF | 2 | 224292526 | C | G | -0.3015 | 0.0631 | 0.9851 | 1.77E-06 | rs116794364 | 10858 | 0.002098234 | 22.82632055 |
| LIF | 3 | 58954742 | C | G | 0.2548 | 0.0556 | 0.021 | 4.59E-06 | rs145344087 | 10281 | 0.00203858 | 20.99736371 |
| LIF | 8 | 109432178 | A | T | 0.0757 | 0.0158 | 0.6575 | 1.66E-06 | rs13264315 | 9460 | 0.002420661 | 22.95016215 |
| LIF | 10 | 31490202 | A | G | 0.1725 | 0.0367 | 0.0351 | 2.60E-06 | rs74992559 | 11784 | 0.001871285 | 22.0888118 |
| LIF | 12 | 68026044 | A | T | -0.3084 | 0.0661 | 0.0168 | 3.08E-06 | rs11608349 | 9362 | 0.002319789 | 21.76371508 |
| LIF | 14 | 97087097 | A | G | -0.0635 | 0.0136 | 0.5456 | 3.02E-06 | rs234592 | 11345 | 0.001917924 | 21.79681638 |
| LIF | 17 | 28341679 | T | G | 0.0671 | 0.0143 | 0.486 | 2.70E-06 | rs7225483 | 9849 | 0.002230545 | 22.01328042 |
| LIF | 19 | 6801966 | A | G | 0.112 | 0.0238 | 0.0899 | 2.53E-06 | rs332426 | 11789 | 0.001874952 | 22.14157177 |
| LIF | 19 | 54851842 | A | G | -0.1011 | 0.0197 | 0.1385 | 2.87E-07 | rs11883375 | 11776 | 0.002231525 | 26.33274256 |
| LIF-R | 1 | 238821453 | A | G | 0.0563 | 0.0122 | 0.4817 | 3.94E-06 | rs12754806 | 11768 | 0.001806381 | 21.29233609 |
| LIF-R | 3 | 12385357 | A | C | -0.0951 | 0.0203 | 0.1784 | 2.80E-06 | rs3963364 | 9453 | 0.002316286 | 21.94204308 |
| LIF-R | 3 | 58363371 | T | C | -0.063 | 0.013 | 0.6603 | 1.26E-06 | rs62258077 | 11762 | 0.001992723 | 23.4812137 |
| LIF-R | 5 | 6378192 | C | G | -0.0824 | 0.0173 | 0.1414 | 1.91E-06 | rs9313148 | 11777 | 0.001922612 | 22.68237143 |
| LIF-R | 5 | 36424241 | A | T | 0.1414 | 0.0302 | 0.9403 | 2.84E-06 | rs72730728 | 11336 | 0.001930128 | 21.91837253 |
| LIF-R | 5 | 38527228 | T | G | 0.0788 | 0.0134 | 0.5419 | 4.09E-09 | rs2289779 | 11336 | 0.003041306 | 34.57532008 |
| LIF-R | 5 | 110784241 | T | C | -0.2181 | 0.0467 | 0.0215 | 3.01E-06 | rs115938660 | 11770 | 0.001849682 | 21.80739384 |
| LIF-R | 6 | 68918580 | A | G | -0.0681 | 0.0145 | 0.2875 | 2.65E-06 | rs778016 | 9883 | 0.002226903 | 22.05313435 |
| LIF-R | 7 | 79349730 | T | C | -0.1306 | 0.0285 | 0.9229 | 4.60E-06 | rs73157388 | 11336 | 0.001848984 | 20.99519946 |
| LIF-R | 8 | 119917062 | A | G | 0.1586 | 0.0333 | 0.961 | 1.91E-06 | rs117117000 | 11784 | 0.001921277 | 22.68005918 |
| LIF-R | 9 | 136155000 | T | C | -0.2885 | 0.0153 | 0.1918 | 2.61E-79 | rs635634 | 11784 | 0.029289095 | 355.4962779 |
| LIF-R | 9 | 136336804 | T | C | 0.2027 | 0.0299 | 0.067 | 1.21E-11 | rs41307428 | 11774 | 0.003888205 | 45.95061652 |
| LIF-R | 10 | 27930818 | A | C | 0.0904 | 0.0192 | 0.1109 | 2.50E-06 | rs1690678 | 11784 | 0.001877697 | 22.16464032 |
| LIF-R | 11 | 126228659 | T | G | 0.1262 | 0.0248 | 0.9129 | 3.61E-07 | rs4937122 | 11336 | 0.002279106 | 25.89039756 |
| LIF-R | 17 | 7063650 | T | C | -0.08 | 0.0172 | 0.7807 | 3.30E-06 | rs72837682 | 11336 | 0.001904738 | 21.62949856 |
| LIF-R | 17 | 36964094 | A | G | -0.2724 | 0.0546 | 0.0169 | 6.07E-07 | rs141933232 | 11724 | 0.002118518 | 24.88598462 |
| LIF-R | 21 | 34695981 | T | G | -0.0812 | 0.0172 | 0.5221 | 2.35E-06 | rs62654645 | 8587 | 0.002588737 | 22.28199135 |
| LIF-R | 21 | 43780807 | A | G | -0.2602 | 0.0566 | 0.0179 | 4.28E-06 | rs147006060 | 11775 | 0.001791604 | 21.13041128 |
| LIF-R | 22 | 41054967 | A | G | 0.6489 | 0.1417 | 0.0043 | 4.66E-06 | rs6002001 | 6861 | 0.003047214 | 20.96472796 |
| CCL8 | 1 | 14260220 | T | G | 0.0728 | 0.0157 | 0.8345 | 3.54E-06 | rs12133241 | 14713 | 0.001459244 | 21.49831462 |
| CCL8 | 1 | 159175354 | A | G | 0.1694 | 0.0113 | 0.5552 | 8.39E-51 | rs12075 | 14730 | 0.015027655 | 224.7040777 |
| CCL8 | 3 | 42877413 | A | G | 0.0576 | 0.0122 | 0.6154 | 2.34E-06 | rs4682862 | 14285 | 0.001558002 | 22.28766118 |
| CCL8 | 3 | 46032441 | A | T | 0.0856 | 0.0119 | 0.362 | 6.33E-13 | rs1846616 | 14719 | 0.00350309 | 51.73620766 |
| CCL8 | 3 | 46390228 | A | G | 0.3004 | 0.0198 | 0.0959 | 5.44E-52 | rs35728689 | 14732 | 0.015384188 | 230.1497528 |
| CCL8 | 3 | 46519788 | T | C | 0.3723 | 0.0695 | 0.9872 | 8.47E-08 | rs181998213 | 14285 | 0.002004771 | 28.69165861 |
| CCL8 | 3 | 132269435 | A | G | 0.0986 | 0.0201 | 0.118 | 9.32E-07 | rs7619350 | 11764 | 0.002041358 | 24.05957072 |
| CCL8 | 3 | 185463545 | C | G | -0.2813 | 0.0556 | 0.9851 | 4.21E-07 | rs149604038 | 13798 | 0.001851692 | 25.59333765 |
| CCL8 | 4 | 19075878 | T | C | 0.0579 | 0.0126 | 0.6697 | 4.32E-06 | rs207311 | 14285 | 0.001476027 | 21.11325673 |
| CCL8 | 5 | 2885014 | A | G | 0.2553 | 0.0538 | 0.0243 | 2.08E-06 | rs148307902 | 13798 | 0.001629344 | 22.51511261 |
| CCL8 | 6 | 20408729 | T | G | -0.2293 | 0.0497 | 0.9789 | 3.96E-06 | rs146186562 | 14285 | 0.001487882 | 21.28308225 |
| CCL8 | 7 | 17977054 | T | C | 0.0618 | 0.0117 | 0.4922 | 1.28E-07 | rs9942602 | 14728 | 0.001890774 | 27.89627704 |
| CCL8 | 8 | 115072929 | A | T | -0.4028 | 0.0864 | 0.991 | 3.13E-06 | rs182599222 | 11334 | 0.001913975 | 21.73075404 |
| CCL8 | 9 | 78838039 | T | C | -0.1381 | 0.0293 | 0.0491 | 2.44E-06 | rs77344300 | 14733 | 0.001505589 | 22.21228091 |
| CCL8 | 11 | 87277670 | T | C | -0.2587 | 0.0562 | 0.9806 | 4.16E-06 | rs117510656 | 14285 | 0.00148114 | 21.18650978 |
| CCL8 | 12 | 30998369 | A | G | 0.0739 | 0.0159 | 0.1756 | 3.35E-06 | rs12367122 | 14284 | 0.00151004 | 21.5990085 |
| CCL8 | 13 | 43553825 | T | C | -0.0684 | 0.0134 | 0.2742 | 3.32E-07 | rs34292320 | 14285 | 0.001820669 | 26.05204371 |
| CCL8 | 15 | 91387220 | A | C | 0.0615 | 0.0133 | 0.4782 | 3.76E-06 | rs11639226 | 14285 | 0.001494573 | 21.37893865 |
| CCL8 | 16 | 4938452 | C | G | 0.1734 | 0.0377 | 0.0256 | 4.24E-06 | rs117265389 | 14733 | 0.001433841 | 21.15224784 |
| CCL8 | 17 | 32567679 | T | C | 0.0751 | 0.013 | 0.2772 | 7.61E-09 | rs11870164 | 14733 | 0.002260057 | 33.36830988 |
| CCL8 | 18 | 75133468 | A | G | -0.2084 | 0.0455 | 0.0286 | 4.64E-06 | rs190108694 | 11325 | 0.001848973 | 20.97470844 |
| CCL8 | 20 | 9086080 | T | C | -0.348 | 0.0653 | 0.0136 | 9.86E-08 | rs79697698 | 13752 | 0.002060963 | 28.39677104 |
| CCL8 | 20 | 15213518 | T | C | -0.1063 | 0.0218 | 0.0875 | 1.08E-06 | rs77128226 | 14285 | 0.001661694 | 23.77347859 |
| CCL8 | 22 | 21921920 | T | G | -0.3227 | 0.0704 | 0.0125 | 4.57E-06 | rs117317477 | 11725 | 0.001788802 | 21.00770093 |
| CCL2 | 1 | 3301962 | A | C | -0.2226 | 0.048 | 0.019 | 3.53E-06 | rs78743764 | 13656 | 0.001572392 | 21.50325651 |
| CCL2 | 1 | 159175354 | A | G | -0.0973 | 0.0116 | 0.5553 | 4.95E-17 | rs12075 | 14733 | 0.004752799 | 70.34783605 |
| CCL2 | 1 | 224882124 | A | G | 0.1462 | 0.0289 | 0.0505 | 4.22E-07 | rs6685547 | 13239 | 0.001929324 | 25.58782939 |
| CCL2 | 1 | 238880980 | C | G | 0.0566 | 0.0122 | 0.6032 | 3.50E-06 | rs7538845 | 14288 | 0.001504139 | 21.52050237 |
| CCL2 | 2 | 43748079 | A | G | 0.1092 | 0.0233 | 0.0823 | 2.78E-06 | rs79965992 | 12851 | 0.001706298 | 21.96169421 |
| CCL2 | 3 | 47071457 | T | C | 0.2198 | 0.0473 | 0.0188 | 3.37E-06 | rs138884871 | 13672 | 0.001576942 | 21.59084102 |
| CCL2 | 5 | 125099527 | A | C | 0.0697 | 0.0147 | 0.2073 | 2.12E-06 | rs407595 | 14287 | 0.001571111 | 22.47864283 |
| CCL2 | 5 | 147351915 | A | G | 0.2225 | 0.048 | 0.979 | 3.56E-06 | rs145516279 | 14288 | 0.001501597 | 21.48407996 |
| CCL2 | 5 | 165649355 | A | T | 0.1121 | 0.0232 | 0.0746 | 1.35E-06 | rs12523126 | 14288 | 0.001631379 | 23.3439562 |
| CCL2 | 6 | 167056258 | A | C | -0.3284 | 0.0669 | 0.9877 | 9.16E-07 | rs79567569 | 13386 | 0.001796893 | 24.09290503 |
| CCL2 | 7 | 30472091 | T | C | -0.0626 | 0.0133 | 0.709 | 2.52E-06 | rs4722985 | 14288 | 0.001548107 | 22.1505538 |
| CCL2 | 9 | 95657986 | A | G | -0.2479 | 0.0536 | 0.9838 | 3.75E-06 | rs181726805 | 14736 | 0.001449486 | 21.38772182 |
| CCL2 | 11 | 76919478 | A | C | 0.0544 | 0.0119 | 0.4764 | 4.84E-06 | rs948962 | 14736 | 0.001416149 | 20.89512287 |
| CCL2 | 11 | 101424282 | C | G | 0.1906 | 0.0408 | 0.976 | 2.99E-06 | rs75573205 | 14725 | 0.001479882 | 21.82058929 |
| CCL2 | 16 | 4704769 | T | C | -0.1553 | 0.0316 | 0.9555 | 8.90E-07 | rs112168535 | 13670 | 0.001763736 | 24.14933643 |
| CCL2 | 17 | 4704175 | A | G | 0.0609 | 0.0121 | 0.4783 | 4.83E-07 | rs9889517 | 14288 | 0.001769796 | 25.32812547 |
| CCL2 | 17 | 32571230 | A | G | -0.812 | 0.0268 | 0.0508 | 1.00E-200 | rs72825048 | 14734 | 0.058650625 | 917.8749448 |
| CCL2 | 17 | 32610534 | T | G | -0.904 | 0.0322 | 0.0365 | 2.00E-173 | rs80219280 | 14736 | 0.050771087 | 788.0724951 |
| CCL2 | 17 | 32625248 | C | G | -0.3591 | 0.0509 | 0.981 | 1.73E-12 | rs188234686 | 12847 | 0.00385935 | 49.765415 |
| CCL2 | 17 | 32632378 | A | G | -0.9051 | 0.0354 | 0.0323 | 3.48E-144 | rs11652256 | 14736 | 0.042477222 | 653.6235003 |
| CCL2 | 17 | 32633263 | T | C | -0.4966 | 0.0757 | 0.9763 | 5.38E-11 | rs16969443 | 10826 | 0.003959412 | 43.02703623 |
| CCL2 | 17 | 32645129 | A | G | 0.296 | 0.0455 | 0.0187 | 7.74E-11 | rs76263310 | 14727 | 0.002865498 | 42.3157113 |
| CCL2 | 17 | 32647357 | A | T | 0.6652 | 0.0371 | 0.9715 | 6.89E-72 | rs34202026 | 14719 | 0.021374448 | 321.4383177 |
| CCL2 | 17 | 32649988 | T | C | 0.4013 | 0.0478 | 0.0184 | 4.64E-17 | rs1821142 | 13422 | 0.00522385 | 70.47219644 |
| CCL2 | 17 | 32652307 | T | C | 0.5171 | 0.0538 | 0.0169 | 7.15E-22 | rs144618566 | 13801 | 0.00664931 | 92.36800911 |
| CCL2 | 17 | 32774385 | T | C | -0.3694 | 0.0547 | 0.014 | 1.45E-11 | rs144101664 | 14288 | 0.003181733 | 45.59931659 |
| CCL2 | 17 | 76944702 | T | C | 0.0761 | 0.0165 | 0.2662 | 3.99E-06 | rs35904471 | 11337 | 0.00187279 | 21.26790947 |
| CCL2 | 18 | 31677370 | A | G | 0.1962 | 0.0399 | 0.9686 | 8.77E-07 | rs80131163 | 14730 | 0.001638842 | 24.17648968 |
| CCL2 | 19 | 2151761 | T | C | -0.0904 | 0.0188 | 0.8703 | 1.52E-06 | rs75580960 | 13224 | 0.001745419 | 23.11827762 |
| CCL2 | 21 | 36741897 | A | G | 0.2798 | 0.0608 | 0.012 | 4.19E-06 | rs74350159 | 13801 | 0.001532187 | 21.17509271 |
| CCL7 | 1 | 108717820 | A | G | -0.0754 | 0.015 | 0.3263 | 4.99E-07 | rs481267 | 9889 | 0.002548587 | 25.26226758 |
| CCL7 | 1 | 159175354 | A | G | -0.0899 | 0.013 | 0.5624 | 4.67E-12 | rs12075 | 11780 | 0.004043225 | 47.8144251 |
| CCL7 | 1 | 192799485 | T | C | 0.0778 | 0.0166 | 0.6951 | 2.78E-06 | rs12142504 | 9448 | 0.002319501 | 21.96094754 |
| CCL7 | 1 | 201769310 | A | G | 0.1941 | 0.0413 | 0.0345 | 2.60E-06 | rs147793446 | 11770 | 0.001873097 | 22.08397081 |
| CCL7 | 2 | 68614232 | A | G | 0.2663 | 0.0547 | 0.0247 | 1.13E-06 | rs146174820 | 10469 | 0.002258814 | 23.69652726 |
| CCL7 | 3 | 42906116 | T | C | -0.3169 | 0.0252 | 0.9268 | 2.88E-36 | rs2228467 | 11782 | 0.013244451 | 158.1137609 |
| CCL7 | 3 | 151048544 | T | C | -0.0933 | 0.0165 | 0.7978 | 1.56E-08 | rs4146770 | 11760 | 0.002711496 | 31.96844656 |
| CCL7 | 3 | 177062154 | T | C | -0.0849 | 0.0167 | 0.5118 | 3.70E-07 | rs11276535 | 7943 | 0.003243299 | 25.83884351 |
| CCL7 | 4 | 47682997 | T | G | -0.0613 | 0.0133 | 0.4117 | 4.05E-06 | rs28667091 | 11782 | 0.001799767 | 21.2394829 |
| CCL7 | 4 | 144892144 | T | G | -0.1716 | 0.0359 | 0.9096 | 1.75E-06 | rs182239847 | 9453 | 0.002411169 | 22.84303342 |
| CCL7 | 5 | 150634915 | C | G | -0.0638 | 0.0134 | 0.4563 | 1.92E-06 | rs153473 | 11335 | 0.001995917 | 22.66496877 |
| CCL7 | 6 | 100087282 | T | G | -0.1046 | 0.0221 | 0.8991 | 2.21E-06 | rs9968876 | 11774 | 0.001899019 | 22.39778357 |
| CCL7 | 9 | 110584352 | A | G | 0.2334 | 0.0492 | 0.0249 | 2.10E-06 | rs139796674 | 11335 | 0.001981475 | 22.50063953 |
| CCL7 | 10 | 121143312 | T | C | 0.1574 | 0.0343 | 0.0404 | 4.46E-06 | rs74157668 | 11781 | 0.001784282 | 21.0546236 |
| CCL7 | 11 | 42245173 | A | G | 0.1507 | 0.0328 | 0.05 | 4.34E-06 | rs148859911 | 11771 | 0.001790141 | 21.10595561 |
| CCL7 | 11 | 68891695 | T | C | -0.0998 | 0.0179 | 0.1822 | 2.47E-08 | rs7116054 | 11335 | 0.002734917 | 31.07981213 |
| CCL7 | 13 | 58931726 | C | G | -0.0969 | 0.0194 | 0.1497 | 5.89E-07 | rs7327202 | 10903 | 0.002282998 | 24.94390374 |
| CCL7 | 15 | 53643049 | A | G | 0.1646 | 0.0339 | 0.9169 | 1.20E-06 | rs28439856 | 7943 | 0.002959297 | 23.56952872 |
| CCL7 | 15 | 93092575 | A | G | 0.2264 | 0.0487 | 0.9779 | 3.34E-06 | rs16947053 | 11783 | 0.00183081 | 21.60832986 |
| CCL7 | 17 | 32522613 | A | G | 0.0942 | 0.0132 | 0.4161 | 9.58E-13 | rs7213460 | 11780 | 0.004304623 | 50.91903948 |
| CCL7 | 20 | 41126657 | T | C | 0.2441 | 0.0514 | 0.0198 | 2.04E-06 | rs78848134 | 11296 | 0.001992592 | 22.54926656 |
| CCL13 | 1 | 159175354 | A | G | 0.189 | 0.0114 | 0.5553 | 9.89E-62 | rs12075 | 14733 | 0.018314501 | 274.8241835 |
| CCL13 | 3 | 42910621 | T | C | 0.1281 | 0.012 | 0.6276 | 1.33E-26 | rs7612912 | 14714 | 0.007685188 | 113.9401356 |
| CCL13 | 3 | 46289113 | A | G | -0.0638 | 0.0131 | 0.3598 | 1.11E-06 | rs55842014 | 12404 | 0.001908567 | 23.71530615 |
| CCL13 | 4 | 115566991 | A | G | 0.1956 | 0.042 | 0.9694 | 3.21E-06 | rs115511138 | 13944 | 0.001553019 | 21.68586872 |
| CCL13 | 4 | 176433708 | T | C | 0.1569 | 0.0332 | 0.0417 | 2.29E-06 | rs62336911 | 14288 | 0.001560702 | 22.33103869 |
| CCL13 | 5 | 22143588 | T | C | 0.0674 | 0.0139 | 0.4123 | 1.24E-06 | rs74794857 | 11760 | 0.001995333 | 23.50803489 |
| CCL13 | 5 | 131707429 | A | G | 0.0609 | 0.0131 | 0.5448 | 3.34E-06 | rs2631360 | 11782 | 0.001830952 | 21.60818383 |
| CCL13 | 6 | 31214807 | A | G | 0.1749 | 0.0368 | 0.963 | 2.01E-06 | rs144118870 | 14735 | 0.001530624 | 22.58525666 |
| CCL13 | 6 | 40051588 | A | G | 0.077 | 0.0168 | 0.8533 | 4.58E-06 | rs847767 | 14733 | 0.001423813 | 21.00409276 |
| CCL13 | 6 | 57282260 | A | T | 0.0873 | 0.019 | 0.5592 | 4.33E-06 | rs1120252 | 9830 | 0.002143068 | 21.10731131 |
| CCL13 | 8 | 116657911 | T | G | -0.1201 | 0.0133 | 0.7293 | 1.72E-19 | rs2721961 | 14288 | 0.005674659 | 81.53084381 |
| CCL13 | 10 | 94520346 | T | C | 0.0668 | 0.0145 | 0.2018 | 4.09E-06 | rs2497351 | 14736 | 0.001438177 | 21.22061534 |
| CCL13 | 14 | 70451473 | A | G | 0.2704 | 0.0553 | 0.0209 | 1.01E-06 | rs10140592 | 13753 | 0.001735447 | 23.90561666 |
| CCL13 | 16 | 74410477 | C | G | 0.093 | 0.0196 | 0.2384 | 2.09E-06 | rs62055193 | 9830 | 0.002285108 | 22.50947596 |
| CCL13 | 17 | 32529710 | T | G | -0.1997 | 0.0251 | 0.0594 | 1.77E-15 | rs72825017 | 14730 | 0.004279013 | 63.29213058 |
| CCL13 | 17 | 32587314 | A | G | 0.1557 | 0.012 | 0.6401 | 1.70E-38 | rs3917900 | 14730 | 0.011299951 | 168.3277668 |
| CCL13 | 17 | 32683289 | A | G | 0.3903 | 0.0251 | 0.9384 | 1.60E-54 | rs3136676 | 14728 | 0.016152278 | 241.7634699 |
| CCL13 | 17 | 56210459 | T | C | -0.1032 | 0.0208 | 0.8805 | 6.99E-07 | rs181250 | 11538 | 0.002129005 | 24.61259681 |
| CCL13 | 19 | 14773077 | A | G | -0.0578 | 0.0126 | 0.2923 | 4.49E-06 | rs8112014 | 14724 | 0.001427146 | 21.04047748 |
| CCL13 | 20 | 12689462 | A | C | -0.2136 | 0.0451 | 0.9807 | 2.18E-06 | rs62201455 | 14722 | 0.001521323 | 22.42799288 |
| CCL13 | 20 | 20023326 | T | C | 0.1432 | 0.0304 | 0.9545 | 2.47E-06 | rs926646 | 14732 | 0.001503916 | 22.18604581 |
| MIP-1 alpha | 2 | 145933927 | A | C | -0.3014 | 0.0604 | 0.0147 | 6.04E-07 | rs570499416 | 12229 | 0.002032068 | 24.89668852 |
| MIP-1 alpha | 4 | 38801285 | A | G | -0.0736 | 0.0135 | 0.7503 | 4.98E-08 | rs5743604 | 14737 | 0.002012816 | 29.71865486 |
| MIP-1 alpha | 6 | 31263051 | A | G | -0.0608 | 0.0133 | 0.7392 | 4.84E-06 | rs2853926 | 14743 | 0.001415477 | 20.89512422 |
| MIP-1 alpha | 7 | 1108954 | A | G | 0.0818 | 0.0179 | 0.1528 | 4.88E-06 | rs113448118 | 11793 | 0.001767697 | 20.87982653 |
| MIP-1 alpha | 8 | 56763360 | T | C | -0.0718 | 0.0151 | 0.4638 | 1.98E-06 | rs188443128 | 10893 | 0.002071319 | 22.60555886 |
| MIP-1 alpha | 12 | 67790676 | T | C | -0.0644 | 0.0124 | 0.632 | 2.06E-07 | rs1125560 | 13863 | 0.0019419 | 26.96905349 |
| MIP-1 alpha | 12 | 111932800 | T | C | -0.0837 | 0.0133 | 0.5247 | 3.11E-10 | rs7137828 | 11344 | 0.003479107 | 39.59780013 |
| MIP-1 alpha | 13 | 25675278 | A | G | -0.0626 | 0.0133 | 0.4935 | 2.52E-06 | rs9507462 | 11767 | 0.001879156 | 22.14988943 |
| MIP-1 alpha | 13 | 66085374 | A | G | 0.0926 | 0.0181 | 0.8776 | 3.12E-07 | rs9540456 | 14295 | 0.001827621 | 26.17002019 |
| MIP-1 alpha | 16 | 4774017 | T | C | 0.1812 | 0.0371 | 0.0304 | 1.04E-06 | rs78871521 | 13246 | 0.001797639 | 23.8508021 |
| MIP-1 alpha | 16 | 81922813 | T | C | -0.1229 | 0.024 | 0.0627 | 3.04E-07 | rs1143687 | 14743 | 0.001775512 | 26.21937669 |
| MIP-1 alpha | 17 | 15741465 | T | C | -0.0668 | 0.0143 | 0.7284 | 2.99E-06 | rs677925 | 12411 | 0.001755138 | 21.81779511 |
| MIP-1 alpha | 17 | 34358060 | A | C | -0.1806 | 0.0325 | 0.0383 | 2.75E-08 | rs56675286 | 14743 | 0.002090134 | 30.87520506 |
| MIP-1 alpha | 17 | 34412293 | A | G | 0.4088 | 0.0135 | 0.231 | 1.00E-200 | rs1719209 | 14295 | 0.060279387 | 916.8398286 |
| MIP-1 alpha | 17 | 34450780 | T | C | -0.1462 | 0.0253 | 0.076 | 7.53E-09 | rs76522981 | 14295 | 0.002330538 | 33.38819466 |
| MIP-1 alpha | 17 | 34820996 | A | G | 0.176 | 0.0162 | 0.8208 | 1.71E-27 | rs9911791 | 14295 | 0.008189172 | 118.0142744 |
| MIP-1 alpha | 18 | 12747235 | T | C | -0.0621 | 0.0136 | 0.2605 | 4.97E-06 | rs2847249 | 14294 | 0.001456527 | 20.84705026 |
| MMP-1 | 1 | 156419786 | A | G | 0.0859 | 0.013 | 0.6981 | 3.90E-11 | rs12141791 | 14296 | 0.003044814 | 43.65548941 |
| MMP-1 | 2 | 63657053 | A | T | 0.1548 | 0.0338 | 0.966 | 4.65E-06 | rs6717478 | 14742 | 0.001420805 | 20.97247034 |
| MMP-1 | 2 | 75116527 | A | G | -0.3153 | 0.0673 | 0.0135 | 2.80E-06 | rs2229629 | 10887 | 0.002012032 | 21.94512321 |
| MMP-1 | 3 | 64991445 | T | C | 0.1234 | 0.0234 | 0.0684 | 1.34E-07 | rs873675 | 14742 | 0.001882885 | 27.80607445 |
| MMP-1 | 7 | 120591120 | T | C | -0.2509 | 0.053 | 0.0177 | 2.20E-06 | rs188626385 | 12935 | 0.001729543 | 22.40693364 |
| MMP-1 | 8 | 106583124 | A | G | 0.1136 | 0.0137 | 0.7422 | 1.11E-16 | rs4734879 | 14296 | 0.004786491 | 68.74716077 |
| MMP-1 | 9 | 99091009 | T | C | 0.0703 | 0.0135 | 0.253 | 1.91E-07 | rs10990535 | 14734 | 0.001837062 | 27.11341102 |
| MMP-1 | 9 | 109554196 | A | T | 0.0649 | 0.014 | 0.7462 | 3.56E-06 | rs10978641 | 14296 | 0.001500951 | 21.48684052 |
| MMP-1 | 11 | 102354473 | A | G | 0.3767 | 0.0445 | 0.9777 | 2.56E-17 | rs141782294 | 14731 | 0.00484096 | 71.64934938 |
| MMP-1 | 11 | 102572180 | T | G | -0.1416 | 0.0238 | 0.0705 | 2.69E-09 | rs77095316 | 14744 | 0.002395057 | 35.39269856 |
| MMP-1 | 11 | 102604607 | T | C | -0.3212 | 0.0264 | 0.9461 | 4.68E-34 | rs2155053 | 14741 | 0.009942071 | 148.007694 |
| MMP-1 | 11 | 102673248 | A | T | -0.3517 | 0.0119 | 0.5613 | 5.73E-192 | rs484915 | 14295 | 0.057584934 | 873.3534655 |
| MMP-1 | 11 | 102806398 | A | G | -0.176 | 0.03 | 0.0455 | 4.45E-09 | rs116889819 | 14744 | 0.002328922 | 34.41310906 |
| MMP-1 | 12 | 57098597 | T | C | -0.0704 | 0.0126 | 0.3436 | 2.31E-08 | rs2926741 | 14296 | 0.002178925 | 31.21357166 |
| MMP-1 | 12 | 83594043 | T | G | 0.0861 | 0.0186 | 0.1146 | 3.67E-06 | rs12367368 | 14744 | 0.001451224 | 21.42503298 |
| MMP-1 | 17 | 4351312 | A | G | 0.0569 | 0.0121 | 0.5023 | 2.57E-06 | rs7219205 | 14296 | 0.001544429 | 22.1102183 |
| MMP-1 | 19 | 14763748 | T | C | -0.0585 | 0.0127 | 0.296 | 4.10E-06 | rs11673125 | 14741 | 0.001437317 | 21.21511366 |
| MMP-10 | 1 | 159990022 | A | C | 0.07 | 0.0153 | 0.822 | 4.76E-06 | rs12567824 | 14296 | 0.001462053 | 20.92919174 |
| MMP-10 | 2 | 140567666 | T | G | -0.069 | 0.015 | 0.7974 | 4.22E-06 | rs1356799 | 13869 | 0.001523381 | 21.15694859 |
| MMP-10 | 5 | 668045 | A | G | -0.4022 | 0.0779 | 0.982 | 2.43E-07 | rs80346512 | 8534 | 0.003113882 | 26.65062666 |
| MMP-10 | 6 | 31423412 | A | G | -0.1769 | 0.0358 | 0.0368 | 7.76E-07 | rs181816009 | 11985 | 0.002033142 | 24.41277416 |
| MMP-10 | 6 | 32551603 | A | G | 0.106 | 0.0208 | 0.2799 | 3.47E-07 | rs41285646 | 8978 | 0.00288437 | 25.9649986 |
| MMP-10 | 6 | 134160498 | T | G | 0.1203 | 0.0249 | 0.0601 | 1.36E-06 | rs112062276 | 14733 | 0.001581808 | 23.33853554 |
| MMP-10 | 8 | 77953661 | C | G | -0.2862 | 0.0608 | 0.0153 | 2.51E-06 | rs112327130 | 12456 | 0.001775749 | 22.15452087 |
| MMP-10 | 9 | 6176871 | C | G | -0.0931 | 0.0166 | 0.8507 | 2.04E-08 | rs72699188 | 14744 | 0.002128837 | 31.4502622 |
| MMP-10 | 10 | 1063892 | A | G | -0.2185 | 0.0469 | 0.0185 | 3.18E-06 | rs55804377 | 14741 | 0.00147025 | 21.70192558 |
| MMP-10 | 10 | 13585421 | A | C | -0.2059 | 0.0444 | 0.9719 | 3.53E-06 | rs539147801 | 11329 | 0.001894661 | 21.50156527 |
| MMP-10 | 11 | 102510046 | T | C | 0.2957 | 0.0181 | 0.879 | 5.38E-60 | rs11225354 | 14296 | 0.018327266 | 266.8607717 |
| MMP-10 | 11 | 102649482 | T | C | 1.1371 | 0.047 | 0.983 | 2.60E-129 | rs17860955 | 14256 | 0.039439259 | 585.2489874 |
| MMP-10 | 11 | 102700352 | A | G | -0.2064 | 0.0233 | 0.9296 | 8.12E-19 | rs17099622 | 14296 | 0.005459033 | 78.45972509 |
| MMP-10 | 11 | 102881952 | A | G | -0.3256 | 0.0494 | 0.9794 | 4.37E-11 | rs142915220 | 13809 | 0.00313609 | 43.43621657 |
| MMP-10 | 12 | 111251437 | C | G | -0.0819 | 0.0178 | 0.1335 | 4.20E-06 | rs7966257 | 14295 | 0.001478771 | 21.16737642 |
| MMP-10 | 14 | 33014869 | T | C | -0.0912 | 0.0196 | 0.0978 | 3.27E-06 | rs3742926 | 14744 | 0.001466307 | 21.64804184 |
| MMP-10 | 17 | 47470487 | A | C | -0.0597 | 0.0122 | 0.585 | 9.91E-07 | rs2584662 | 14296 | 0.001672198 | 23.94243071 |
| MMP-10 | 19 | 49206145 | C | G | 0.1003 | 0.0117 | 0.4452 | 1.01E-17 | rs516316 | 14742 | 0.00496037 | 73.4803505 |
| MMP-10 | 20 | 20711695 | A | G | -0.2315 | 0.0503 | 0.0188 | 4.18E-06 | rs113958571 | 14296 | 0.001479478 | 21.17899066 |
| NRTN | 1 | 214886642 | A | G | -0.0652 | 0.0141 | 0.3445 | 3.76E-06 | rs4360502 | 11342 | 0.001881695 | 21.37865495 |
| NRTN | 2 | 15734798 | A | G | 0.0786 | 0.0172 | 0.8077 | 4.88E-06 | rs62120726 | 11343 | 0.001837644 | 20.87909242 |
| NRTN | 2 | 172434373 | C | G | -0.0622 | 0.0136 | 0.3324 | 4.80E-06 | rs908372 | 11773 | 0.001773556 | 20.91361787 |
| NRTN | 3 | 73067086 | T | C | 0.3387 | 0.0738 | 0.0176 | 4.44E-06 | rs76777800 | 6941 | 0.003025379 | 21.05680682 |
| NRTN | 4 | 43313220 | T | C | -0.4361 | 0.0867 | 0.0118 | 4.91E-07 | rs143131035 | 7585 | 0.003324545 | 25.2941127 |
| NRTN | 5 | 21508959 | C | G | -0.0879 | 0.0176 | 0.6738 | 5.90E-07 | rs7712604 | 8587 | 0.002896351 | 24.93740457 |
| NRTN | 5 | 171026588 | T | C | -0.074 | 0.0159 | 0.2493 | 3.25E-06 | rs29630 | 11343 | 0.001905955 | 21.65671639 |
| NRTN | 8 | 43185781 | T | G | 0.3743 | 0.0786 | 0.0252 | 1.92E-06 | rs192427410 | 8783 | 0.002575323 | 22.67230402 |
| NRTN | 11 | 4475910 | T | C | 0.1667 | 0.034 | 0.958 | 9.44E-07 | rs77216559 | 11791 | 0.002034596 | 24.03475469 |
| NRTN | 11 | 10358788 | A | G | 0.1565 | 0.031 | 0.0646 | 4.46E-07 | rs182274799 | 9461 | 0.002686581 | 25.48082464 |
| NRTN | 11 | 95201232 | A | G | 0.087 | 0.0178 | 0.5434 | 1.02E-06 | rs4753678 | 7942 | 0.002998916 | 23.88301329 |
| NRTN | 15 | 24046105 | T | C | 0.1332 | 0.0286 | 0.9133 | 3.20E-06 | rs8033310 | 11343 | 0.001908617 | 21.68701609 |
| NRTN | 16 | 21786236 | T | C | -0.1778 | 0.037 | 0.9507 | 1.54E-06 | rs28759830 | 9461 | 0.002434806 | 23.08703961 |
| NRTN | 16 | 26080883 | A | T | 0.0746 | 0.0157 | 0.6725 | 2.02E-06 | rs7202385 | 9460 | 0.002380959 | 22.57285664 |
| NRTN | 19 | 14691684 | A | C | -0.1731 | 0.0366 | 0.0363 | 2.25E-06 | rs10412462 | 11790 | 0.001893629 | 22.36445334 |
| NRTN | 20 | 55469957 | A | G | -0.2288 | 0.0495 | 0.0208 | 3.80E-06 | rs113580784 | 11768 | 0.001812221 | 21.36130725 |
| NT-3 | 2 | 46306174 | C | G | -0.2464 | 0.0539 | 0.0161 | 4.84E-06 | rs145686993 | 14257 | 0.001463658 | 20.89502758 |
| NT-3 | 4 | 7533099 | A | G | -0.1163 | 0.0251 | 0.0638 | 3.60E-06 | rs79759094 | 14728 | 0.001455578 | 21.46609303 |
| NT-3 | 5 | 1731054 | A | G | -0.0555 | 0.0121 | 0.3609 | 4.50E-06 | rs12517801 | 14726 | 0.001426627 | 21.03566463 |
| NT-3 | 5 | 114451587 | A | C | 0.0582 | 0.012 | 0.5677 | 1.23E-06 | rs2034246 | 14296 | 0.001642687 | 23.51920922 |
| NT-3 | 6 | 111688927 | A | G | 0.1364 | 0.0294 | 0.0429 | 3.49E-06 | rs3218587 | 14744 | 0.001457757 | 21.52163019 |
| NT-3 | 6 | 151293888 | T | C | 0.1366 | 0.0263 | 0.0567 | 2.06E-07 | rs112418830 | 14296 | 0.001883461 | 26.97299302 |
| NT-3 | 7 | 8762956 | A | G | -0.2393 | 0.0507 | 0.0175 | 2.36E-06 | rs2107473 | 13394 | 0.001660494 | 22.27432872 |
| NT-3 | 7 | 40026172 | A | C | -0.2571 | 0.0553 | 0.9866 | 3.33E-06 | rs17537796 | 14254 | 0.001514116 | 21.61190003 |
| NT-3 | 7 | 152298228 | T | C | -0.092 | 0.02 | 0.1114 | 4.22E-06 | rs73166403 | 14296 | 0.001477947 | 21.15703973 |
| NT-3 | 8 | 72031901 | C | G | 0.058 | 0.0125 | 0.3811 | 3.48E-06 | rs72652073 | 14296 | 0.001503723 | 21.52658802 |
| NT-3 | 9 | 87478172 | T | G | 0.0557 | 0.012 | 0.5265 | 3.46E-06 | rs10780690 | 14296 | 0.001504802 | 21.5420553 |
| NT-3 | 10 | 115833862 | T | C | -0.1859 | 0.0386 | 0.0249 | 1.46E-06 | rs146532158 | 14741 | 0.001570994 | 23.19130795 |
| NT-3 | 11 | 101727684 | A | C | -0.0973 | 0.0203 | 0.8737 | 1.64E-06 | rs11225042 | 12412 | 0.001847518 | 22.97013879 |
| NT-3 | 11 | 123375056 | A | G | 0.0582 | 0.0125 | 0.3022 | 3.22E-06 | rs2846299 | 14721 | 0.001470448 | 21.67539077 |
| NT-3 | 12 | 5680104 | A | T | 0.1106 | 0.022 | 0.0799 | 4.98E-07 | rs58399805 | 14737 | 0.001712031 | 25.27004114 |
| NT-3 | 14 | 19356757 | A | C | -0.1076 | 0.0219 | 0.8004 | 8.96E-07 | rs540074689 | 10703 | 0.002250362 | 24.13543617 |
| NT-3 | 15 | 88514855 | C | G | -0.1168 | 0.0164 | 0.1435 | 1.06E-12 | rs28735437 | 14737 | 0.00343002 | 50.71530552 |
| NT-3 | 18 | 55310060 | C | G | -0.0819 | 0.0172 | 0.7735 | 1.92E-06 | rs376150779 | 10894 | 0.002076924 | 22.66893783 |
| NT-3 | 18 | 72123860 | C | G | 0.0734 | 0.0124 | 0.5258 | 3.23E-09 | rs11151953 | 14296 | 0.002444956 | 35.03385981 |
| NT-3 | 22 | 43649715 | T | C | 0.1823 | 0.0398 | 0.0287 | 4.64E-06 | rs5751454 | 13680 | 0.001531283 | 20.97701531 |
| OPG | 1 | 27021913 | C | G | -0.1948 | 0.034 | 0.0337 | 1.01E-08 | rs114165349 | 14727 | 0.002224021 | 32.82170121 |
| OPG | 1 | 40045085 | T | G | -0.0637 | 0.0139 | 0.3753 | 4.59E-06 | rs56009454 | 10894 | 0.00192409 | 20.9975936 |
| OPG | 3 | 172223982 | T | C | -0.1569 | 0.0299 | 0.9631 | 1.54E-07 | rs17600346 | 14723 | 0.001866791 | 27.53242793 |
| OPG | 4 | 32870458 | C | G | -0.2242 | 0.0486 | 0.9758 | 3.97E-06 | rs28454196 | 14285 | 0.001487551 | 21.27834614 |
| OPG | 4 | 99986023 | C | G | -0.0671 | 0.0129 | 0.7288 | 1.98E-07 | rs1230164 | 14285 | 0.001890443 | 27.05233839 |
| OPG | 6 | 130506773 | A | G | -0.1555 | 0.0334 | 0.962 | 3.23E-06 | rs192337992 | 11978 | 0.001806335 | 21.67181734 |
| OPG | 6 | 134519823 | T | C | 0.3067 | 0.0628 | 0.0154 | 1.04E-06 | rs144471361 | 12145 | 0.001960012 | 23.84716411 |
| OPG | 8 | 8604423 | A | C | 0.0522 | 0.0114 | 0.5556 | 4.67E-06 | rs6985207 | 14285 | 0.001465595 | 20.96382351 |
| OPG | 8 | 119443927 | C | G | 0.0837 | 0.0146 | 0.4689 | 9.87E-09 | rs9643126 | 10893 | 0.00300808 | 32.85984109 |
| OPG | 8 | 120081031 | T | C | -0.1705 | 0.0114 | 0.5577 | 1.42E-50 | rs2247769 | 14285 | 0.015417394 | 223.6548166 |
| OPG | 10 | 55029035 | A | G | 0.1965 | 0.0429 | 0.9791 | 4.64E-06 | rs77507094 | 14726 | 0.001422681 | 20.97739412 |
| OPG | 11 | 16272199 | A | C | -0.079 | 0.0147 | 0.2072 | 7.69E-08 | rs1437633 | 12851 | 0.002242372 | 28.87698974 |
| OPG | 12 | 71789031 | A | G | -0.2692 | 0.0568 | 0.0133 | 2.14E-06 | rs376613127 | 13154 | 0.001704726 | 22.4588442 |
| OPG | 12 | 85607051 | T | C | -0.1471 | 0.0298 | 0.9603 | 7.96E-07 | rs74111611 | 14732 | 0.001651252 | 24.36317327 |
| OPG | 12 | 119984130 | T | C | -0.2253 | 0.0473 | 0.0196 | 1.91E-06 | rs138557324 | 14285 | 0.001585735 | 22.68502663 |
| OPG | 13 | 109537182 | A | G | -0.2671 | 0.0567 | 0.9843 | 2.47E-06 | rs61968587 | 13798 | 0.001605712 | 22.1880279 |
| OPG | 14 | 69271784 | A | G | 0.057 | 0.0109 | 0.49 | 1.70E-07 | rs10142466 | 14721 | 0.001854186 | 27.34246772 |
| OPG | 14 | 94838142 | T | G | 0.2618 | 0.0433 | 0.0205 | 1.48E-09 | rs112635299 | 14733 | 0.002475119 | 36.55144346 |
| OPG | 15 | 84250648 | A | G | -0.2007 | 0.0423 | 0.0206 | 2.09E-06 | rs138408096 | 14721 | 0.001526909 | 22.50893789 |
| OPG | 17 | 26694861 | A | G | -0.1404 | 0.0111 | 0.4726 | 1.14E-36 | rs704 | 14733 | 0.010742526 | 159.9665943 |
| OPG | 17 | 47938521 | T | C | -0.0672 | 0.0129 | 0.748 | 1.90E-07 | rs271665 | 14710 | 0.001841391 | 27.13314114 |
| OPG | 18 | 76523646 | T | C | 0.172 | 0.0376 | 0.9707 | 4.77E-06 | rs9946923 | 13230 | 0.001579192 | 20.92259488 |
| OPG | 20 | 36001673 | A | G | -0.2822 | 0.0592 | 0.9756 | 1.87E-06 | rs562335808 | 10894 | 0.002081509 | 22.71908661 |
| OSM | 3 | 155531845 | A | G | 0.0882 | 0.0167 | 0.5176 | 1.28E-07 | rs7432752 | 10894 | 0.002553914 | 27.88845721 |
| OSM | 6 | 31274196 | T | C | -0.1048 | 0.0191 | 0.8812 | 4.09E-08 | rs9264931 | 14736 | 0.002038871 | 30.10210619 |
| OSM | 8 | 2621859 | A | T | 0.1155 | 0.0243 | 0.9154 | 2.00E-06 | rs7007281 | 11775 | 0.001914953 | 22.58799326 |
| OSM | 8 | 41555366 | T | C | -0.0594 | 0.0125 | 0.6496 | 2.01E-06 | rs559651 | 14715 | 0.001532239 | 22.57843482 |
| OSM | 9 | 137876508 | C | G | 0.2926 | 0.0621 | 0.0172 | 2.46E-06 | rs117867445 | 10471 | 0.002115716 | 22.19639698 |
| OSM | 10 | 30032133 | A | G | 0.2665 | 0.0525 | 0.0176 | 3.85E-07 | rs76275710 | 14735 | 0.001745689 | 25.76421227 |
| OSM | 11 | 47424864 | A | G | -0.0847 | 0.017 | 0.139 | 6.28E-07 | rs61897429 | 14735 | 0.001681852 | 24.82047146 |
| OSM | 11 | 72945341 | T | C | 0.177 | 0.0236 | 0.9163 | 6.38E-14 | rs2511241 | 13668 | 0.004098585 | 56.2417691 |
| OSM | 11 | 102334152 | T | C | -0.0803 | 0.0173 | 0.8631 | 3.46E-06 | rs7102957 | 14288 | 0.001505612 | 21.54160651 |
| OSM | 12 | 112007756 | T | C | -0.0728 | 0.0132 | 0.5224 | 3.48E-08 | rs653178 | 11785 | 0.00257434 | 30.41173427 |
| OSM | 14 | 88422929 | T | C | -0.1077 | 0.0178 | 0.2079 | 1.44E-09 | rs111865607 | 10894 | 0.003349246 | 36.60257707 |
| OSM | 15 | 22508018 | A | G | 0.1274 | 0.0276 | 0.211 | 3.91E-06 | rs4779338 | 8491 | 0.002503072 | 21.30190211 |
| OSM | 17 | 38137033 | A | G | 0.1101 | 0.0117 | 0.5367 | 4.95E-21 | rs3859189 | 14729 | 0.005976218 | 88.54090141 |
| OSM | 17 | 75178814 | A | G | -0.2566 | 0.0536 | 0.019 | 1.69E-06 | rs116928468 | 11770 | 0.001943401 | 22.91447553 |
| OSM | 21 | 42594678 | A | G | -0.152 | 0.0327 | 0.0371 | 3.35E-06 | rs80303768 | 14722 | 0.001465507 | 21.60392531 |
| OSM | 22 | 30600105 | C | G | -0.159 | 0.0346 | 0.0363 | 4.32E-06 | rs4823082 | 14724 | 0.001432167 | 21.11460959 |
| OSM | 22 | 38211954 | A | G | -0.0663 | 0.0122 | 0.5586 | 5.50E-08 | rs2285179 | 14288 | 0.002062715 | 29.52885449 |
| OSM | 22 | 49231540 | A | G | 0.0636 | 0.0136 | 0.7378 | 2.92E-06 | rs28444486 | 14735 | 0.001481979 | 21.8664088 |
| PD-L1 | 1 | 27646512 | A | G | -0.4926 | 0.0993 | 0.0079 | 7.02E-07 | rs146328951 | 9354 | 0.002623928 | 24.60353161 |
| PD-L1 | 1 | 238609559 | A | G | 0.0961 | 0.0192 | 0.868 | 5.58E-07 | rs184265227 | 14288 | 0.001750298 | 25.04860373 |
| PD-L1 | 3 | 127280969 | A | G | -0.0816 | 0.0176 | 0.8717 | 3.55E-06 | rs4974444 | 14288 | 0.00150221 | 21.49285883 |
| PD-L1 | 5 | 18901704 | C | G | -0.1008 | 0.0219 | 0.0929 | 4.17E-06 | rs35024691 | 12825 | 0.001649144 | 21.18190925 |
| PD-L1 | 5 | 90058982 | T | G | 0.1407 | 0.0273 | 0.9234 | 2.55E-07 | rs62373966 | 11777 | 0.002250349 | 26.55761933 |
| PD-L1 | 5 | 159936536 | T | C | -0.1179 | 0.0248 | 0.0613 | 1.99E-06 | rs10043030 | 14091 | 0.001601351 | 22.59761487 |
| PD-L1 | 6 | 19842497 | T | C | 0.0554 | 0.0116 | 0.4457 | 1.79E-06 | rs6917605 | 14733 | 0.001545755 | 22.80576221 |
| PD-L1 | 6 | 134673561 | A | G | 0.1933 | 0.0385 | 0.0292 | 5.15E-07 | rs75510105 | 14727 | 0.001708776 | 25.20480058 |
| PD-L1 | 7 | 151019021 | C | G | 0.1913 | 0.0407 | 0.966 | 2.60E-06 | rs12539643 | 11337 | 0.001944901 | 22.08841226 |
| PD-L1 | 8 | 68297799 | T | G | -0.1142 | 0.025 | 0.074 | 4.92E-06 | rs113674769 | 12404 | 0.001679424 | 20.8632595 |
| PD-L1 | 9 | 5448218 | T | C | -0.1295 | 0.012 | 0.3471 | 3.77E-27 | rs822335 | 14736 | 0.00784113 | 116.4442632 |
| PD-L1 | 9 | 5485387 | A | T | 0.1138 | 0.0213 | 0.916 | 9.16E-08 | rs60830384 | 14718 | 0.001935687 | 28.54081022 |
| PD-L1 | 9 | 34007646 | A | T | 0.0832 | 0.016 | 0.1779 | 1.99E-07 | rs7026097 | 12834 | 0.002102474 | 27.03578619 |
| PD-L1 | 11 | 1948186 | T | C | -0.0609 | 0.0128 | 0.6543 | 1.96E-06 | rs7125631 | 14288 | 0.001581815 | 22.63361114 |
| PD-L1 | 11 | 127683667 | T | G | 0.061 | 0.0114 | 0.5018 | 8.75E-08 | rs7945680 | 14728 | 0.001940272 | 28.62799865 |
| PD-L1 | 12 | 48670152 | T | C | 0.0537 | 0.0117 | 0.5862 | 4.44E-06 | rs7304709 | 14727 | 0.001428373 | 21.06288539 |
| PD-L1 | 12 | 111932800 | T | C | -0.0622 | 0.0133 | 0.5235 | 2.92E-06 | rs7137828 | 11337 | 0.001925495 | 21.86758711 |
| PD-L1 | 15 | 89721461 | T | C | -0.0577 | 0.012 | 0.4351 | 1.52E-06 | rs2283438 | 14288 | 0.001615532 | 23.11683315 |
| PD-L1 | 19 | 5799008 | A | G | 0.1619 | 0.0324 | 0.0521 | 5.83E-07 | rs79045618 | 10714 | 0.002325097 | 24.9644843 |
| SCF | 1 | 88911632 | T | C | 0.1202 | 0.0233 | 0.9155 | 2.49E-07 | rs78397068 | 14288 | 0.001859163 | 26.60947448 |
| SCF | 1 | 223111265 | A | G | -0.1584 | 0.0345 | 0.0354 | 4.40E-06 | rs71644719 | 14727 | 0.001429344 | 21.07721284 |
| SCF | 1 | 234853268 | A | C | -0.0553 | 0.0118 | 0.4647 | 2.78E-06 | rs557933 | 14287 | 0.001534893 | 21.95965172 |
| SCF | 2 | 71106068 | A | G | -0.0567 | 0.0116 | 0.4624 | 1.02E-06 | rs11126305 | 14718 | 0.001620679 | 23.88862318 |
| SCF | 2 | 174863785 | T | G | 0.2137 | 0.0434 | 0.9647 | 8.48E-07 | rs573618345 | 10894 | 0.002220633 | 24.24096179 |
| SCF | 4 | 18944656 | T | C | -0.0718 | 0.0153 | 0.185 | 2.69E-06 | rs7664024 | 14288 | 0.001538954 | 22.01938734 |
| SCF | 4 | 60174833 | A | G | -0.428 | 0.0907 | 0.9928 | 2.37E-06 | rs186248365 | 11538 | 0.001926216 | 22.26371719 |
| SCF | 4 | 183543315 | T | C | -0.1619 | 0.0339 | 0.0373 | 1.79E-06 | rs34813411 | 14717 | 0.0015474 | 22.80527311 |
| SCF | 6 | 31270311 | A | G | 0.1407 | 0.0303 | 0.0716 | 3.42E-06 | rs9264796 | 12404 | 0.001735349 | 21.5592132 |
| SCF | 7 | 94953895 | A | G | 0.0789 | 0.012 | 0.4598 | 4.87E-11 | rs705379 | 14288 | 0.003016533 | 43.22457368 |
| SCF | 8 | 47325114 | A | G | 0.4722 | 0.1032 | 0.007 | 4.75E-06 | rs2133027 | 8290 | 0.002519084 | 20.93089421 |
| SCF | 8 | 126507308 | T | C | -0.0683 | 0.0126 | 0.2937 | 5.94E-08 | rs2980888 | 14735 | 0.001990146 | 29.37929471 |
| SCF | 9 | 79147122 | T | C | 0.0575 | 0.0118 | 0.4446 | 1.10E-06 | rs785900 | 14288 | 0.001659125 | 23.74164894 |
| SCF | 9 | 107661742 | A | C | 0.1156 | 0.0133 | 0.7485 | 3.57E-18 | rs2740488 | 14732 | 0.005101869 | 75.53590257 |
| SCF | 9 | 128807910 | T | C | -0.1391 | 0.0205 | 0.0915 | 1.16E-11 | rs138854302 | 14736 | 0.003114671 | 46.03494096 |
| SCF | 9 | 136065526 | T | C | 0.105 | 0.0219 | 0.1215 | 1.63E-06 | rs12378537 | 11337 | 0.002023543 | 22.98337199 |
| SCF | 10 | 122531747 | T | C | 0.1548 | 0.0339 | 0.0334 | 4.96E-06 | rs11199541 | 14736 | 0.001413022 | 20.84892029 |
| SCF | 11 | 834389 | T | C | -0.0721 | 0.015 | 0.7926 | 1.53E-06 | rs72847212 | 13659 | 0.001688632 | 23.10066147 |
| SCF | 11 | 13357183 | A | G | -0.0568 | 0.012 | 0.6474 | 2.21E-06 | rs10832027 | 14734 | 0.001518286 | 22.40140325 |
| SCF | 11 | 61551356 | T | C | -0.0735 | 0.0121 | 0.6459 | 1.24E-09 | rs174535 | 14736 | 0.002497688 | 36.89308651 |
| SCF | 11 | 133206940 | A | C | -0.0606 | 0.0129 | 0.3129 | 2.63E-06 | rs10894669 | 14735 | 0.001495429 | 22.06514961 |
| SCF | 12 | 89369806 | T | C | -0.0707 | 0.0122 | 0.6366 | 6.83E-09 | rs11608458 | 14288 | 0.002344921 | 33.57827414 |
| SCF | 13 | 26799167 | A | C | -0.0938 | 0.0192 | 0.1062 | 1.03E-06 | rs71431776 | 14714 | 0.001619454 | 23.86405185 |
| SCF | 15 | 43623397 | T | G | 0.2803 | 0.0512 | 0.9812 | 4.38E-08 | rs45617141 | 12935 | 0.002311717 | 29.96671366 |
| SCF | 16 | 25205611 | A | T | -0.0715 | 0.0152 | 0.2479 | 2.55E-06 | rs2161465 | 11966 | 0.001845753 | 22.12342251 |
| SCF | 16 | 56993161 | A | G | 0.1146 | 0.0123 | 0.3094 | 1.20E-20 | rs12149545 | 14736 | 0.00585637 | 86.79607073 |
| SCF | 16 | 67928042 | A | G | 0.1658 | 0.0171 | 0.1303 | 3.14E-22 | rs16942887 | 14736 | 0.006339213 | 93.99784224 |
| SCF | 17 | 16356498 | A | G | 0.2116 | 0.0453 | 0.0274 | 3.00E-06 | rs151246947 | 13224 | 0.001647237 | 21.81570413 |
| SCF | 18 | 43867311 | A | G | 0.0538 | 0.0117 | 0.4265 | 4.26E-06 | rs11877350 | 14728 | 0.001433593 | 21.14140512 |
| SCF | 19 | 54793830 | C | G | 0.095 | 0.0141 | 0.2138 | 1.61E-11 | rs798893 | 14725 | 0.003073384 | 45.38893513 |
| SCF | 20 | 44109198 | A | G | 0.2422 | 0.0516 | 0.0144 | 2.68E-06 | rs146276488 | 14728 | 0.001493674 | 22.02875207 |
| SCF | 20 | 44551855 | T | C | -0.2858 | 0.0144 | 0.8039 | 1.16E-87 | rs6073958 | 14730 | 0.026045657 | 393.8587456 |
| SCF | 20 | 44776543 | T | C | -0.1985 | 0.0341 | 0.0394 | 5.85E-09 | rs2024570 | 14288 | 0.002365985 | 33.88062931 |
| SCF | 22 | 25253027 | A | G | 0.1104 | 0.024 | 0.9366 | 4.22E-06 | rs139690 | 14734 | 0.001434075 | 21.15712773 |
| SIRT2 | 2 | 122731427 | A | G | 0.104 | 0.0218 | 0.9138 | 1.84E-06 | rs138897138 | 14288 | 0.001590344 | 22.75584126 |
| SIRT2 | 3 | 14613224 | T | C | -0.1521 | 0.0329 | 0.9617 | 3.78E-06 | rs116198125 | 14727 | 0.001449181 | 21.37015385 |
| SIRT2 | 4 | 160629137 | A | G | -0.1063 | 0.0229 | 0.0886 | 3.45E-06 | rs60459634 | 14288 | 0.001505808 | 21.5444181 |
| SIRT2 | 5 | 78787853 | A | G | 0.1277 | 0.0277 | 0.9506 | 4.02E-06 | rs115455827 | 14735 | 0.001440277 | 21.25021386 |
| SIRT2 | 5 | 177560339 | A | T | 0.0639 | 0.0138 | 0.7496 | 3.65E-06 | rs7718478 | 14288 | 0.001498376 | 21.43792503 |
| SIRT2 | 6 | 63413043 | A | G | -0.3428 | 0.0737 | 0.989 | 3.30E-06 | rs72883370 | 12737 | 0.001695674 | 21.63109234 |
| SIRT2 | 6 | 158193698 | A | G | 0.076 | 0.0145 | 0.6981 | 1.59E-07 | rs1034059 | 14288 | 0.001919047 | 27.4682116 |
| SIRT2 | 7 | 14143486 | C | G | -0.1286 | 0.0243 | 0.9177 | 1.21E-07 | rs12531843 | 12404 | 0.002252829 | 28.00266465 |
| SIRT2 | 8 | 89590527 | T | C | 0.2573 | 0.0551 | 0.9858 | 3.02E-06 | rs147383134 | 13801 | 0.001577539 | 21.80285836 |
| SIRT2 | 12 | 83600525 | A | C | -0.0841 | 0.0184 | 0.8864 | 4.86E-06 | rs11115639 | 14730 | 0.001416244 | 20.88802479 |
| SIRT2 | 13 | 37413465 | T | C | 0.0862 | 0.0184 | 0.8546 | 2.80E-06 | rs77381020 | 14288 | 0.001533702 | 21.94411598 |
| SIRT2 | 19 | 39379770 | T | C | -0.5739 | 0.0515 | 0.0161 | 7.69E-29 | rs144373891 | 14736 | 0.008356682 | 124.1649575 |
| SIRT2 | 22 | 45002809 | A | G | 0.0965 | 0.0208 | 0.885 | 3.49E-06 | rs12152184 | 12402 | 0.00173254 | 21.52077539 |
| SLAMF1 | 1 | 26973918 | A | G | 0.0664 | 0.0138 | 0.542 | 1.50E-06 | rs141439288 | 11757 | 0.001965292 | 23.14750045 |
| SLAMF1 | 1 | 160581152 | A | C | -0.1256 | 0.0159 | 0.1616 | 2.80E-15 | rs12058421 | 14731 | 0.004218102 | 62.39159135 |
| SLAMF1 | 1 | 160636559 | T | C | 0.2209 | 0.0162 | 0.8506 | 2.45E-42 | rs60094514 | 14732 | 0.012463864 | 185.9098666 |
| SLAMF1 | 2 | 62575443 | A | G | -0.0612 | 0.0123 | 0.3695 | 6.50E-07 | rs13014154 | 14285 | 0.001730057 | 24.75322633 |
| SLAMF1 | 2 | 216910771 | A | G | 0.3328 | 0.0655 | 0.989 | 3.76E-07 | rs192245879 | 13799 | 0.001867346 | 25.81196603 |
| SLAMF1 | 3 | 98605646 | A | C | 0.066 | 0.0132 | 0.4501 | 5.73E-07 | rs1972433 | 11333 | 0.002201092 | 24.99558811 |
| SLAMF1 | 3 | 186731157 | A | T | 0.0727 | 0.0121 | 0.6151 | 1.88E-09 | rs10212190 | 14285 | 0.002520703 | 36.09418771 |
| SLAMF1 | 4 | 6642331 | A | G | 0.0707 | 0.0153 | 0.1909 | 3.82E-06 | rs3806818 | 13853 | 0.001539016 | 21.34977296 |
| SLAMF1 | 4 | 106143797 | A | G | -0.0609 | 0.0127 | 0.5964 | 1.62E-06 | rs13147502 | 12843 | 0.001787244 | 22.9910871 |
| SLAMF1 | 5 | 95263427 | A | G | 0.1321 | 0.0164 | 0.2395 | 7.96E-16 | rs570025519 | 10894 | 0.005920409 | 64.86914904 |
| SLAMF1 | 6 | 32635501 | A | G | 0.1017 | 0.0168 | 0.796 | 1.42E-09 | rs114466578 | 12733 | 0.002869753 | 36.63997102 |
| SLAMF1 | 6 | 42462406 | T | C | -0.0589 | 0.0119 | 0.4969 | 7.44E-07 | rs7745783 | 14286 | 0.001711914 | 24.49491081 |
| SLAMF1 | 6 | 152893441 | T | C | 0.0688 | 0.0143 | 0.2204 | 1.50E-06 | rs2623960 | 14286 | 0.001617674 | 23.14429719 |
| SLAMF1 | 7 | 38626562 | T | C | 0.058 | 0.0125 | 0.3266 | 3.48E-06 | rs10499604 | 14730 | 0.001459483 | 21.52667677 |
| SLAMF1 | 7 | 134817203 | A | G | -0.1585 | 0.0295 | 0.0447 | 7.75E-08 | rs79348253 | 14719 | 0.001957426 | 28.86393154 |
| SLAMF1 | 9 | 78767497 | C | G | -0.1982 | 0.043 | 0.0213 | 4.04E-06 | rs17720330 | 14727 | 0.001440556 | 21.24278266 |
| SLAMF1 | 10 | 28873202 | T | C | -0.0747 | 0.0126 | 0.2977 | 3.06E-09 | rs2790462 | 14733 | 0.002379984 | 35.14318786 |
| SLAMF1 | 10 | 66091335 | A | G | -0.2863 | 0.0577 | 0.0181 | 6.98E-07 | rs138657007 | 12790 | 0.001921256 | 24.61632136 |
| SLAMF1 | 12 | 111884608 | T | C | 0.097 | 0.013 | 0.4758 | 8.55E-14 | rs3184504 | 11783 | 0.004702769 | 55.66510623 |
| SLAMF1 | 12 | 121218380 | T | G | 0.0569 | 0.0123 | 0.5251 | 3.73E-06 | rs11065264 | 12848 | 0.001662861 | 21.39669518 |
| SLAMF1 | 13 | 26736047 | T | C | 0.2712 | 0.0569 | 0.9863 | 1.88E-06 | rs111865527 | 14244 | 0.001592322 | 22.71401216 |
| SLAMF1 | 13 | 78282092 | C | G | -0.2791 | 0.0598 | 0.0148 | 3.05E-06 | rs73231041 | 12735 | 0.001707561 | 21.77955965 |
| SLAMF1 | 13 | 107639422 | T | C | 0.2421 | 0.0506 | 0.9791 | 1.71E-06 | rs112742549 | 13499 | 0.001692977 | 22.88886174 |
| SLAMF1 | 14 | 87822926 | T | C | -0.0644 | 0.0128 | 0.3774 | 4.87E-07 | rs147616029 | 12850 | 0.001966047 | 25.30953672 |
| SLAMF1 | 15 | 55294543 | T | G | -0.0557 | 0.012 | 0.5136 | 3.46E-06 | rs1609310 | 14286 | 0.001505854 | 21.5420532 |
| SLAMF1 | 17 | 7063899 | A | C | 0.1013 | 0.0156 | 0.2121 | 8.38E-11 | rs56244095 | 14286 | 0.002942924 | 42.16080454 |
| SLAMF1 | 17 | 79220224 | C | G | 0.0894 | 0.0141 | 0.4462 | 2.29E-10 | rs2725405 | 10271 | 0.003898769 | 40.19316787 |
| SLAMF1 | 18 | 59233474 | A | G | -0.3592 | 0.073 | 0.9888 | 8.63E-07 | rs149092077 | 11137 | 0.00216928 | 24.20744409 |
| SLAMF1 | 18 | 72388527 | A | G | -0.1486 | 0.0324 | 0.0449 | 4.51E-06 | rs35271532 | 14286 | 0.001470273 | 21.03230128 |
| SLAMF1 | 19 | 17337555 | A | C | 0.0674 | 0.0145 | 0.2299 | 3.35E-06 | rs3745163 | 13669 | 0.001578197 | 21.60330711 |
| SLAMF1 | 22 | 22451222 | T | C | 0.1063 | 0.0229 | 0.0805 | 3.45E-06 | rs73151926 | 14286 | 0.001506019 | 21.54441768 |
| ST1A1 | 1 | 86468724 | T | C | -0.0984 | 0.0206 | 0.8775 | 1.78E-06 | rs1698742 | 11790 | 0.001931534 | 22.81298307 |
| ST1A1 | 1 | 119273856 | A | G | 0.0702 | 0.0147 | 0.466 | 1.79E-06 | rs2712255 | 9849 | 0.002310165 | 22.80086668 |
| ST1A1 | 3 | 186459927 | T | C | -0.0712 | 0.0135 | 0.599 | 1.33E-07 | rs710446 | 11793 | 0.002353125 | 27.81113999 |
| ST1A1 | 4 | 127777021 | T | C | -0.3184 | 0.0684 | 0.9871 | 3.24E-06 | rs149869672 | 10858 | 0.001991674 | 21.66476148 |
| ST1A1 | 4 | 142303334 | A | C | 0.1048 | 0.0214 | 0.8462 | 9.72E-07 | rs371387526 | 8817 | 0.002712655 | 23.97709116 |
| ST1A1 | 4 | 187161211 | T | C | -0.1678 | 0.0136 | 0.4926 | 5.64E-35 | rs66530140 | 10913 | 0.013757692 | 152.204151 |
| ST1A1 | 5 | 176839890 | T | G | -0.083 | 0.0152 | 0.2653 | 4.75E-08 | rs2731674 | 11790 | 0.002522657 | 29.81228957 |
| ST1A1 | 6 | 52231674 | A | G | 0.0924 | 0.0199 | 0.8711 | 3.43E-06 | rs55793562 | 11781 | 0.001826676 | 21.55579553 |
| ST1A1 | 7 | 77960330 | T | C | -0.0645 | 0.0135 | 0.5986 | 1.77E-06 | rs2691531 | 11793 | 0.001931914 | 22.82328919 |
| ST1A1 | 8 | 11410797 | T | C | -0.3483 | 0.0756 | 0.9898 | 4.08E-06 | rs7812322 | 10858 | 0.001951036 | 21.22185561 |
| ST1A1 | 8 | 17377551 | A | G | -0.1504 | 0.0318 | 0.95 | 2.25E-06 | rs2213907 | 11790 | 0.001893671 | 22.36494089 |
| ST1A1 | 8 | 126413022 | A | G | 0.0768 | 0.0166 | 0.4768 | 3.72E-06 | rs55939507 | 9460 | 0.00225753 | 21.40003271 |
| ST1A1 | 11 | 19560616 | T | C | -0.1433 | 0.0287 | 0.9287 | 5.94E-07 | rs77919742 | 11345 | 0.002192657 | 24.9259672 |
| ST1A1 | 11 | 128596369 | A | T | 0.134 | 0.0285 | 0.0644 | 2.58E-06 | rs76833948 | 11345 | 0.001944778 | 22.10259717 |
| ST1A1 | 12 | 12719921 | C | G | 0.1077 | 0.0224 | 0.8871 | 1.52E-06 | rs72656644 | 11345 | 0.002033512 | 23.11313212 |
| ST1A1 | 12 | 23759406 | T | C | -0.08 | 0.0173 | 0.8156 | 3.76E-06 | rs10842189 | 11784 | 0.001811372 | 21.38031268 |
| ST1A1 | 12 | 74902158 | A | C | -0.1927 | 0.0361 | 0.0662 | 9.40E-08 | rs9804965 | 9265 | 0.003065985 | 28.48756085 |
| ST1A1 | 12 | 103074539 | T | C | -0.0715 | 0.0147 | 0.2856 | 1.15E-06 | rs703595 | 11789 | 0.002002764 | 23.65395302 |
| ST1A1 | 12 | 113112650 | T | C | 0.0622 | 0.0136 | 0.4128 | 4.80E-06 | rs232928 | 11345 | 0.001840342 | 20.91348381 |
| ST1A1 | 16 | 28285775 | A | G | 0.0695 | 0.0139 | 0.561 | 5.73E-07 | rs11074902 | 11345 | 0.002198769 | 24.99559277 |
| ST1A1 | 16 | 28561581 | T | C | -0.1882 | 0.0135 | 0.5314 | 3.58E-44 | rs149278 | 11344 | 0.01684334 | 194.3099886 |
| ST1A1 | 17 | 54851764 | A | G | 0.271 | 0.0581 | 0.9826 | 3.10E-06 | rs117222566 | 10403 | 0.00208699 | 21.75218133 |
| ST1A1 | 21 | 28777897 | A | C | -0.18 | 0.0376 | 0.9587 | 1.69E-06 | rs72643498 | 11788 | 0.001940375 | 22.91372148 |
| STAMPB | 2 | 74061232 | A | G | 0.2195 | 0.0425 | 0.0229 | 2.41E-07 | rs111872246 | 14248 | 0.001868637 | 26.67044258 |
| STAMPB | 2 | 122731427 | A | G | 0.1085 | 0.0218 | 0.9138 | 6.46E-07 | rs138897138 | 14288 | 0.001730704 | 24.76770084 |
| STAMPB | 3 | 14613224 | T | C | -0.1484 | 0.0325 | 0.9619 | 4.97E-06 | rs116198125 | 14727 | 0.001413749 | 20.84692945 |
| STAMPB | 6 | 158193698 | A | G | 0.0695 | 0.0145 | 0.698 | 1.64E-06 | rs1034059 | 14288 | 0.00160533 | 22.97062484 |
| STAMPB | 7 | 14143486 | C | G | -0.1251 | 0.0243 | 0.9177 | 2.63E-07 | rs12531843 | 12404 | 0.002132128 | 26.49915599 |
| STAMPB | 7 | 29807677 | T | G | 0.1578 | 0.0339 | 0.0643 | 3.24E-06 | rs200824954 | 10894 | 0.001985017 | 21.66381125 |
| STAMPB | 10 | 6800809 | T | C | -0.1908 | 0.0394 | 0.0247 | 1.28E-06 | rs75610895 | 14730 | 0.001589537 | 23.4479741 |
| STAMPB | 14 | 104363671 | A | G | -0.1722 | 0.0352 | 0.0323 | 9.98E-07 | rs111581172 | 14736 | 0.001621424 | 23.92886061 |
| STAMPB | 15 | 81240669 | A | G | -0.1571 | 0.0309 | 0.0404 | 3.69E-07 | rs2280441 | 14735 | 0.001751153 | 25.84499544 |
| STAMPB | 16 | 84586319 | T | C | 0.0876 | 0.0169 | 0.3579 | 2.18E-07 | rs114302245 | 10894 | 0.002460241 | 26.86303419 |
| STAMPB | 17 | 60294757 | A | G | 0.235 | 0.0512 | 0.0269 | 4.44E-06 | rs73327656 | 13801 | 0.001524133 | 21.06361273 |
| STAMPB | 19 | 6195636 | A | G | 0.1288 | 0.0272 | 0.0724 | 2.19E-06 | rs140656901 | 13224 | 0.00169276 | 22.41961912 |
| STAMPB | 19 | 56709656 | A | G | 0.2031 | 0.0437 | 0.0246 | 3.36E-06 | rs10426867 | 12785 | 0.001686643 | 21.59678125 |
| STAMPB | 22 | 45002809 | A | G | 0.0961 | 0.0208 | 0.8851 | 3.83E-06 | rs12152184 | 12402 | 0.001718231 | 21.34273458 |
| TGF-alpha | 1 | 166175871 | C | G | -0.2692 | 0.056 | 0.9835 | 1.53E-06 | rs78912149 | 13798 | 0.00167198 | 23.10527289 |
| TGF-alpha | 2 | 70774295 | A | T | 0.137 | 0.0184 | 0.114 | 9.65E-14 | rs72912115 | 14728 | 0.00374999 | 55.43020809 |
| TGF-alpha | 4 | 16165036 | A | G | -0.2684 | 0.05 | 0.0153 | 7.96E-08 | rs34007466 | 14733 | 0.001952024 | 28.81151232 |
| TGF-alpha | 5 | 132025905 | A | C | -0.0761 | 0.0166 | 0.7246 | 4.55E-06 | rs11242125 | 9453 | 0.002218294 | 21.01170248 |
| TGF-alpha | 6 | 31034990 | T | C | 0.0717 | 0.0146 | 0.2343 | 9.06E-07 | rs9262670 | 12842 | 0.001874498 | 24.11376132 |
| TGF-alpha | 8 | 2654153 | C | G | 0.1081 | 0.023 | 0.905 | 2.60E-06 | rs1963491 | 11334 | 0.001945212 | 22.08610199 |
| TGF-alpha | 8 | 13724808 | C | G | 0.1678 | 0.0361 | 0.9681 | 3.35E-06 | rs34630685 | 14285 | 0.001510195 | 21.60273313 |
| TGF-alpha | 10 | 30042437 | T | C | -0.2601 | 0.0508 | 0.9817 | 3.05E-07 | rs74130123 | 14733 | 0.001776192 | 26.2116476 |
| TGF-alpha | 10 | 90836825 | A | G | -0.095 | 0.0198 | 0.1322 | 1.60E-06 | rs4934441 | 11780 | 0.0019504 | 23.01670172 |
| TGF-alpha | 11 | 119506018 | T | C | 0.0959 | 0.019 | 0.1107 | 4.48E-07 | rs12270510 | 14731 | 0.001726424 | 25.47246916 |
| TGF-alpha | 12 | 112007756 | T | C | -0.0708 | 0.0131 | 0.5228 | 6.50E-08 | rs653178 | 11782 | 0.002473031 | 29.2045283 |
| TGF-alpha | 17 | 38137033 | A | G | 0.0655 | 0.0116 | 0.5369 | 1.64E-08 | rs3859189 | 14726 | 0.002160442 | 31.87921613 |
| TGF-alpha | 17 | 52902972 | A | T | -0.0581 | 0.0122 | 0.4071 | 1.91E-06 | rs111613293 | 14285 | 0.001585125 | 22.67627917 |
| TGF-alpha | 19 | 15885492 | A | T | 0.143 | 0.0307 | 0.9552 | 3.19E-06 | rs78464136 | 14285 | 0.001516547 | 21.69374423 |
| TGF-alpha | 19 | 58857883 | A | G | 0.2856 | 0.0569 | 0.9866 | 5.19E-07 | rs149146289 | 14285 | 0.001760542 | 25.19016806 |
| TWEAK | 2 | 86307128 | A | G | -0.0649 | 0.013 | 0.478 | 5.97E-07 | rs12328100 | 11784 | 0.002110534 | 24.9189061 |
| TWEAK | 2 | 117991812 | A | T | 0.1289 | 0.0254 | 0.9163 | 3.88E-07 | rs333835 | 11337 | 0.002266495 | 25.74908372 |
| TWEAK | 3 | 108099780 | T | C | 0.0674 | 0.0135 | 0.4514 | 5.96E-07 | rs7621032 | 11337 | 0.002193817 | 24.92158352 |
| TWEAK | 4 | 126954768 | T | C | 0.246 | 0.0472 | 0.0296 | 1.87E-07 | rs537908127 | 9243 | 0.002930211 | 27.15765295 |
| TWEAK | 4 | 146658520 | T | C | -0.1517 | 0.031 | 0.9506 | 9.90E-07 | rs4835254 | 11770 | 0.002030433 | 23.94274669 |
| TWEAK | 6 | 44325149 | T | C | 0.1175 | 0.0255 | 0.078 | 4.07E-06 | rs867063 | 11337 | 0.001869324 | 21.22847273 |
| TWEAK | 6 | 127494091 | A | G | 0.2512 | 0.0533 | 0.9796 | 2.44E-06 | rs138684734 | 10850 | 0.002042993 | 22.20776179 |
| TWEAK | 7 | 80365289 | A | G | -0.3062 | 0.0629 | 0.0173 | 1.13E-06 | rs117427219 | 10850 | 0.002179374 | 23.69348913 |
| TWEAK | 7 | 150140762 | T | C | -0.0606 | 0.0131 | 0.5366 | 3.73E-06 | rs7806921 | 11778 | 0.001813605 | 21.39581845 |
| TWEAK | 8 | 136662225 | A | G | -0.298 | 0.0646 | 0.9824 | 3.97E-06 | rs148560093 | 9984 | 0.002126857 | 21.27553478 |
| TWEAK | 10 | 11469516 | A | G | -0.1207 | 0.0247 | 0.0885 | 1.03E-06 | rs12354434 | 11337 | 0.002101884 | 23.8750347 |
| TWEAK | 10 | 106909970 | A | G | -0.0653 | 0.0142 | 0.2861 | 4.25E-06 | rs1377015 | 11782 | 0.001791645 | 21.14345452 |
| TWEAK | 12 | 50824101 | T | C | 0.3405 | 0.066 | 0.0132 | 2.48E-07 | rs141295666 | 11337 | 0.002342231 | 26.61152355 |
| TWEAK | 17 | 10503956 | A | T | 0.1372 | 0.0288 | 0.0615 | 1.90E-06 | rs1266163 | 11337 | 0.001997821 | 22.6906337 |
| TWEAK | 17 | 15740146 | T | C | -0.0836 | 0.0183 | 0.344 | 4.92E-06 | rs9913313 | 7957 | 0.002615914 | 20.86417426 |
| TWEAK | 19 | 33635097 | C | G | -0.1127 | 0.0226 | 0.8939 | 6.14E-07 | rs12975019 | 10278 | 0.002413642 | 24.86259388 |
| TWEAK | 20 | 2931738 | C | G | 0.51 | 0.1077 | 0.0088 | 2.19E-06 | rs6138961 | 7308 | 0.003059003 | 22.41764951 |
| TWEAK | 22 | 45932279 | T | C | 0.0826 | 0.0177 | 0.1679 | 3.06E-06 | rs9614693 | 11763 | 0.001847958 | 21.77407502 |
| TNFB | 1 | 63459761 | T | C | -0.1917 | 0.041 | 0.9711 | 2.93E-06 | rs77897196 | 11792 | 0.001850481 | 21.85761877 |
| TNFB | 1 | 110256931 | C | G | -0.1918 | 0.0403 | 0.029 | 1.94E-06 | rs12743015 | 11784 | 0.001918494 | 22.64714173 |
| TNFB | 2 | 53931190 | A | G | 0.0748 | 0.0161 | 0.2098 | 3.38E-06 | rs7583622 | 11769 | 0.001830695 | 21.58130161 |
| TNFB | 2 | 119783156 | T | C | -0.1441 | 0.0309 | 0.0534 | 3.11E-06 | rs112317147 | 11344 | 0.001913432 | 21.74374909 |
| TNFB | 2 | 215575422 | T | C | 0.1514 | 0.0317 | 0.0511 | 1.79E-06 | rs16852556 | 11344 | 0.002006756 | 22.80639548 |
| TNFB | 3 | 141634940 | T | C | -0.3872 | 0.0842 | 0.0118 | 4.25E-06 | rs192303297 | 7843 | 0.002689025 | 21.14149784 |
| TNFB | 4 | 35497008 | T | C | 0.2324 | 0.0499 | 0.0237 | 3.20E-06 | rs113244922 | 10470 | 0.002067406 | 21.68643618 |
| TNFB | 5 | 21093728 | T | C | 0.2469 | 0.049 | 0.9743 | 4.69E-07 | rs114250919 | 11305 | 0.002240811 | 25.38476696 |
| TNFB | 5 | 167809091 | A | G | -0.1741 | 0.0379 | 0.967 | 4.36E-06 | rs76913603 | 11782 | 0.001787817 | 21.09819949 |
| TNFB | 6 | 28404463 | C | G | -0.2968 | 0.0602 | 0.0156 | 8.21E-07 | rs72854560 | 11344 | 0.002138154 | 24.30290761 |
| TNFB | 6 | 30137890 | T | C | 0.2308 | 0.0421 | 0.9618 | 4.20E-08 | rs2074475 | 11792 | 0.002542228 | 30.04925795 |
| TNFB | 6 | 31042217 | T | C | -0.1991 | 0.0144 | 0.2883 | 1.77E-43 | rs2523882 | 11792 | 0.015953128 | 191.1366062 |
| TNFB | 6 | 31222566 | A | G | 0.147 | 0.03 | 0.1212 | 9.58E-07 | rs75105185 | 9906 | 0.002417923 | 24.00515243 |
| TNFB | 6 | 31451847 | A | G | -0.625 | 0.0196 | 0.1165 | 1.00E-200 | rs2904602 | 11791 | 0.079391201 | 1016.65645 |
| TNFB | 6 | 31821910 | T | C | -0.3554 | 0.0467 | 0.0294 | 2.74E-14 | rs542608643 | 8387 | 0.00685813 | 57.90252593 |
| TNFB | 6 | 32044834 | C | G | -0.1199 | 0.0238 | 0.0834 | 4.71E-07 | rs9267798 | 11792 | 0.002147649 | 25.3752767 |
| TNFB | 7 | 46566236 | T | C | 0.2496 | 0.0532 | 0.0218 | 2.71E-06 | rs74363807 | 11344 | 0.00193668 | 22.00844317 |
| TNFB | 11 | 72666063 | T | C | -0.3418 | 0.0735 | 0.0137 | 3.31E-06 | rs138471526 | 9983 | 0.002161566 | 21.62133088 |
| TNFB | 12 | 6429443 | A | G | -0.2485 | 0.0521 | 0.0294 | 1.85E-06 | rs139511528 | 10280 | 0.002208128 | 22.74536122 |
| TNFB | 12 | 6514963 | A | C | 0.1759 | 0.0189 | 0.1645 | 1.32E-20 | rs2364485 | 11344 | 0.007577717 | 86.60271267 |
| TNFB | 12 | 52132524 | A | G | 0.1732 | 0.035 | 0.0415 | 7.48E-07 | rs147423408 | 11344 | 0.002154056 | 24.48404177 |
| TNFB | 12 | 111865049 | C | G | 0.1356 | 0.0134 | 0.4758 | 4.53E-24 | rs7310615 | 11344 | 0.008946245 | 102.3842628 |
| TNFB | 13 | 23714434 | C | G | -0.229 | 0.0491 | 0.9731 | 3.10E-06 | rs537860389 | 9240 | 0.002348631 | 21.74773173 |
| TNFB | 13 | 47656376 | T | C | 0.2122 | 0.0451 | 0.9751 | 2.54E-06 | rs143019966 | 10913 | 0.00202448 | 22.13390675 |
| TNFB | 14 | 34880659 | A | G | -0.1252 | 0.0259 | 0.0934 | 1.34E-06 | rs12883833 | 9259 | 0.002517389 | 23.36228455 |
| TNFB | 15 | 100064767 | T | C | -0.0626 | 0.0136 | 0.5824 | 4.17E-06 | rs28700215 | 11344 | 0.001864208 | 21.1833321 |
| TNFB | 17 | 65264208 | A | G | 0.0748 | 0.0159 | 0.7583 | 2.55E-06 | rs55914821 | 11344 | 0.001947136 | 22.12750116 |
| TNFRSF9 | 1 | 7972201 | A | G | -0.1301 | 0.013 | 0.5203 | 1.41E-23 | rs1776354 | 11783 | 0.008428226 | 100.1369056 |
| TNFRSF9 | 2 | 8443803 | A | G | -0.0682 | 0.0144 | 0.3043 | 2.18E-06 | rs10178845 | 11765 | 0.001902938 | 22.42693532 |
| TNFRSF9 | 2 | 120226781 | A | C | -0.0968 | 0.0199 | 0.1322 | 1.15E-06 | rs2579649 | 11336 | 0.002082952 | 23.65745011 |
| TNFRSF9 | 3 | 177868759 | A | G | 0.375 | 0.0809 | 0.0104 | 3.56E-06 | rs150949259 | 8674 | 0.002470994 | 21.48153659 |
| TNFRSF9 | 4 | 28155085 | T | G | 0.2317 | 0.0504 | 0.9796 | 4.28E-06 | rs140214797 | 11769 | 0.001792554 | 21.13086061 |
| TNFRSF9 | 4 | 153651229 | A | C | 0.3111 | 0.065 | 0.9869 | 1.70E-06 | rs72964492 | 9983 | 0.002289374 | 22.90267938 |
| TNFRSF9 | 5 | 124329728 | A | G | 0.0924 | 0.0201 | 0.1947 | 4.29E-06 | rs7737635 | 9453 | 0.002230552 | 21.12807515 |
| TNFRSF9 | 5 | 174179760 | T | C | -0.0982 | 0.0203 | 0.1231 | 1.32E-06 | rs75246422 | 11784 | 0.001981877 | 23.39683888 |
| TNFRSF9 | 5 | 176766177 | A | G | -0.0693 | 0.0139 | 0.6695 | 6.18E-07 | rs4976685 | 11763 | 0.002108638 | 24.85209595 |
| TNFRSF9 | 6 | 31312538 | A | G | 0.0926 | 0.0149 | 0.2629 | 5.14E-10 | rs2854008 | 11784 | 0.003266898 | 38.61675005 |
| TNFRSF9 | 8 | 50188685 | A | G | 0.3742 | 0.0814 | 0.0105 | 4.29E-06 | rs146380867 | 10849 | 0.001944124 | 21.12898756 |
| TNFRSF9 | 8 | 99918668 | C | G | -0.4015 | 0.0847 | 0.9895 | 2.13E-06 | rs10101219 | 9540 | 0.002349818 | 22.4653517 |
| TNFRSF9 | 8 | 118333064 | A | G | -0.1626 | 0.0313 | 0.9533 | 2.05E-07 | rs1846520 | 11782 | 0.002285282 | 26.98228216 |
| TNFRSF9 | 9 | 87717237 | A | G | 0.0707 | 0.0152 | 0.7165 | 3.30E-06 | rs7858310 | 11336 | 0.001904863 | 21.63092158 |
| TNFRSF9 | 10 | 90880926 | T | C | -0.0995 | 0.0212 | 0.1219 | 2.69E-06 | rs11202989 | 11336 | 0.001939418 | 22.02408176 |
| TNFRSF9 | 11 | 2632174 | A | T | -0.1438 | 0.0281 | 0.0736 | 3.10E-07 | rs72850206 | 11336 | 0.002304853 | 26.18354849 |
| TNFRSF9 | 12 | 6503786 | T | C | 0.0703 | 0.015 | 0.2853 | 2.78E-06 | rs9669611 | 11783 | 0.001860645 | 21.96111622 |
| TNFRSF9 | 12 | 67215987 | A | G | -0.0669 | 0.014 | 0.3517 | 1.77E-06 | rs12227836 | 11336 | 0.002010307 | 22.83071619 |
| TNFRSF9 | 12 | 111884608 | T | C | 0.0681 | 0.013 | 0.476 | 1.62E-07 | rs3184504 | 11784 | 0.002323296 | 27.43682188 |
| TNFRSF9 | 12 | 129783438 | A | G | 0.064 | 0.0131 | 0.4447 | 1.03E-06 | rs10744409 | 11764 | 0.0020248 | 23.86401514 |
| TNFRSF9 | 13 | 28604007 | T | C | -0.2714 | 0.0593 | 0.9828 | 4.72E-06 | rs76428106 | 10849 | 0.001927005 | 20.9425823 |
| TNFRSF9 | 13 | 58754621 | A | T | -0.3325 | 0.0719 | 0.9767 | 3.76E-06 | rs143274881 | 9353 | 0.002281302 | 21.38122783 |
| TNFRSF9 | 13 | 108993494 | A | G | -0.1402 | 0.0296 | 0.9406 | 2.17E-06 | rs12874404 | 11336 | 0.001975123 | 22.43034617 |
| TNFRSF9 | 14 | 20709993 | C | G | 0.0889 | 0.0182 | 0.2828 | 1.04E-06 | rs8005108 | 9453 | 0.002517656 | 23.85441944 |
| TNFRSF9 | 14 | 63713358 | C | G | -0.1155 | 0.0228 | 0.901 | 4.07E-07 | rs57700441 | 11773 | 0.002175011 | 25.65786349 |
| TNFRSF9 | 17 | 16522922 | A | G | 0.3284 | 0.0668 | 0.019 | 8.83E-07 | rs118083884 | 9785 | 0.002463889 | 24.16376456 |
| TNFRSF9 | 19 | 49126012 | C | G | 0.097 | 0.0206 | 0.8419 | 2.49E-06 | rs1645331 | 9033 | 0.002448569 | 22.16730311 |
| TNFRSF9 | 20 | 2629394 | A | T | 0.1189 | 0.0242 | 0.8742 | 8.96E-07 | rs192538756 | 9453 | 0.002547157 | 24.13465431 |
| TNFSF14 | 2 | 137066601 | T | C | -0.0628 | 0.0137 | 0.6354 | 4.56E-06 | rs10211598 | 11770 | 0.001782079 | 21.00895012 |
| TNFSF14 | 4 | 94769686 | A | G | -0.0818 | 0.0166 | 0.2019 | 8.32E-07 | rs7688836 | 11791 | 0.002055163 | 24.27821536 |
| TNFSF14 | 4 | 125709779 | A | C | -0.2421 | 0.0498 | 0.0299 | 1.17E-06 | rs147119146 | 11788 | 0.002000879 | 23.62964532 |
| TNFSF14 | 5 | 39861942 | C | G | -0.2117 | 0.043 | 0.0273 | 8.51E-07 | rs76778362 | 11791 | 0.002051457 | 24.23433646 |
| TNFSF14 | 5 | 131652529 | A | C | 0.0785 | 0.0132 | 0.5494 | 2.73E-09 | rs11950562 | 11793 | 0.002989969 | 35.36045071 |
| TNFSF14 | 6 | 22713651 | T | C | -0.0651 | 0.0141 | 0.3144 | 3.89E-06 | rs9295562 | 11771 | 0.001807693 | 21.31326354 |
| TNFSF14 | 6 | 56788897 | A | G | -0.2574 | 0.0506 | 0.0213 | 3.64E-07 | rs115950744 | 11302 | 0.002284376 | 25.87254744 |
| TNFSF14 | 7 | 28896826 | A | T | 0.1692 | 0.0364 | 0.9583 | 3.35E-06 | rs117442125 | 11345 | 0.001900934 | 21.60336394 |
| TNFSF14 | 8 | 27416526 | A | C | 0.2392 | 0.0522 | 0.0209 | 4.60E-06 | rs78336300 | 10917 | 0.001919745 | 20.99431816 |
| TNFSF14 | 8 | 36844946 | T | G | -0.1456 | 0.0303 | 0.0551 | 1.55E-06 | rs117720118 | 11773 | 0.001957489 | 23.0867983 |
| TNFSF14 | 8 | 99636603 | A | G | -0.2358 | 0.0506 | 0.023 | 3.16E-06 | rs79233212 | 11345 | 0.00191052 | 21.71250841 |
| TNFSF14 | 9 | 132432461 | A | G | 0.229 | 0.0497 | 0.024 | 4.07E-06 | rs59801342 | 10721 | 0.001976349 | 21.22643999 |
| TNFSF14 | 10 | 111146614 | T | C | -0.2336 | 0.0511 | 0.9787 | 4.84E-06 | rs79791117 | 10903 | 0.00191305 | 20.89412575 |
| TNFSF14 | 12 | 74925803 | T | C | -0.1519 | 0.0316 | 0.0635 | 1.53E-06 | rs1461044 | 11792 | 0.001955707 | 23.10296483 |
| TNFSF14 | 12 | 91045724 | T | C | -0.0683 | 0.0147 | 0.3338 | 3.38E-06 | rs11105725 | 11345 | 0.001899226 | 21.5839124 |
| TNFSF14 | 13 | 100645723 | T | C | 0.0619 | 0.0135 | 0.5736 | 4.54E-06 | rs4772260 | 11790 | 0.001780025 | 21.02035678 |
| TNFSF14 | 15 | 23989218 | T | C | -0.6334 | 0.1109 | 0.0083 | 1.12E-08 | rs184708984 | 6942 | 0.004677055 | 32.61128312 |
| TNFSF14 | 15 | 79463978 | T | C | -0.2255 | 0.0472 | 0.0287 | 1.77E-06 | rs74600570 | 11778 | 0.001934179 | 22.82103527 |
| TNFSF14 | 16 | 78681855 | T | C | -0.063 | 0.0133 | 0.5474 | 2.17E-06 | rs2738591 | 11789 | 0.001899656 | 22.43386659 |
| TNFSF14 | 18 | 11626563 | A | G | 0.1048 | 0.0208 | 0.1883 | 4.69E-07 | rs9961731 | 9461 | 0.002676055 | 25.3807282 |
| TNFSF14 | 18 | 14002436 | C | G | -0.0698 | 0.0152 | 0.2595 | 4.39E-06 | rs34925583 | 11345 | 0.001855294 | 21.08371326 |
| TNFSF14 | 18 | 70105531 | T | C | -0.0905 | 0.0186 | 0.1483 | 1.14E-06 | rs9962377 | 11793 | 0.002003439 | 23.66996473 |
| TNFSF14 | 19 | 5968688 | A | G | -0.0811 | 0.0176 | 0.1772 | 4.07E-06 | rs11085155 | 11774 | 0.001800155 | 21.22963829 |
| TNFSF14 | 19 | 6665020 | T | C | -0.4894 | 0.0273 | 0.0625 | 7.29E-72 | rs344560 | 11793 | 0.026527839 | 321.3135029 |
| TNFSF14 | 19 | 6682873 | A | G | 0.2584 | 0.0327 | 0.0429 | 2.74E-15 | rs11569551 | 11793 | 0.005267102 | 62.43323723 |
| TNFSF14 | 19 | 29938464 | T | C | 0.1032 | 0.0215 | 0.8112 | 1.59E-06 | rs76688046 | 7942 | 0.002892641 | 23.03419794 |
| TRAIL | 1 | 196710916 | T | C | -0.1191 | 0.0147 | 0.8073 | 5.40E-16 | rs16840522 | 14725 | 0.004438148 | 65.63414952 |
| TRAIL | 2 | 203169224 | A | G | 0.0882 | 0.0182 | 0.8717 | 1.26E-06 | rs2138380 | 13239 | 0.0017708 | 23.48165922 |
| TRAIL | 2 | 209615008 | A | G | -0.2297 | 0.0501 | 0.0323 | 4.54E-06 | rs368805685 | 11760 | 0.001784283 | 21.0170943 |
| TRAIL | 3 | 113950321 | A | T | -0.1311 | 0.0279 | 0.9501 | 2.62E-06 | rs28424593 | 14722 | 0.001497543 | 22.07689405 |
| TRAIL | 3 | 172130799 | T | G | 0.1252 | 0.02 | 0.1051 | 3.85E-10 | rs490342 | 13228 | 0.002953723 | 39.18167505 |
| TRAIL | 3 | 172274232 | A | C | 0.5818 | 0.0399 | 0.9715 | 3.69E-48 | rs574044675 | 13173 | 0.015884121 | 212.5865091 |
| TRAIL | 3 | 186449122 | A | G | 0.285 | 0.0187 | 0.886 | 1.90E-52 | rs5030044 | 14287 | 0.015997846 | 232.2446439 |
| TRAIL | 4 | 57703725 | T | C | 0.1622 | 0.0347 | 0.0376 | 2.95E-06 | rs146922303 | 14727 | 0.001481442 | 21.84659546 |
| TRAIL | 4 | 67749461 | C | G | -0.2835 | 0.0606 | 0.0106 | 2.89E-06 | rs142889372 | 14238 | 0.001534775 | 21.88264772 |
| TRAIL | 4 | 69327121 | T | G | 0.2641 | 0.0535 | 0.019 | 7.96E-07 | rs145386370 | 13386 | 0.001817141 | 24.36488386 |
| TRAIL | 4 | 181271289 | T | G | 0.0674 | 0.0138 | 0.7733 | 1.04E-06 | rs17779404 | 14723 | 0.001617567 | 23.85078189 |
| TRAIL | 5 | 75017740 | T | C | -0.26 | 0.0564 | 0.0161 | 4.03E-06 | rs114597610 | 14735 | 0.001440166 | 21.24856162 |
| TRAIL | 5 | 162595921 | A | G | 0.189 | 0.037 | 0.9721 | 3.25E-07 | rs111257277 | 14729 | 0.001768391 | 26.0892254 |
| TRAIL | 6 | 18023031 | A | T | 0.1694 | 0.0354 | 0.0304 | 1.71E-06 | rs78956561 | 14719 | 0.001553341 | 22.89608731 |
| TRAIL | 6 | 33692744 | A | C | 0.1342 | 0.0265 | 0.063 | 4.10E-07 | rs140862652 | 14287 | 0.001791816 | 25.64203471 |
| TRAIL | 6 | 57391519 | T | C | 0.0807 | 0.0175 | 0.5094 | 4.00E-06 | rs2894910 | 9830 | 0.002158634 | 21.26094686 |
| TRAIL | 6 | 90047013 | A | G | 0.0655 | 0.0118 | 0.4536 | 2.84E-08 | rs1065657 | 14287 | 0.002151998 | 30.80759422 |
| TRAIL | 7 | 52792820 | T | C | 0.1823 | 0.038 | 0.9624 | 1.61E-06 | rs6969337 | 11336 | 0.002026121 | 23.0106833 |
| TRAIL | 7 | 135852098 | A | G | -0.5024 | 0.1076 | 0.0051 | 3.02E-06 | rs141011299 | 9812 | 0.002216937 | 21.79647113 |
| TRAIL | 10 | 107586667 | T | G | -0.1452 | 0.0316 | 0.0401 | 4.33E-06 | rs2418781 | 14287 | 0.001475627 | 21.11048774 |
| TRAIL | 11 | 61549025 | A | G | 0.0787 | 0.0121 | 0.3509 | 7.81E-11 | rs174533 | 14732 | 0.002863332 | 42.29799298 |
| TRAIL | 11 | 103163928 | A | G | -0.244 | 0.0491 | 0.0227 | 6.71E-07 | rs180941492 | 13800 | 0.001786328 | 24.69185527 |
| TRAIL | 12 | 104261323 | A | T | -0.0881 | 0.0185 | 0.8739 | 1.92E-06 | rs10745981 | 12850 | 0.00176173 | 22.67465878 |
| TRAIL | 14 | 94844947 | T | C | 0.6692 | 0.044 | 0.0205 | 3.08E-52 | rs28929474 | 14735 | 0.015455804 | 231.2850494 |
| TRAIL | 16 | 57345733 | T | C | 0.0691 | 0.0145 | 0.2543 | 1.88E-06 | rs2113173 | 14287 | 0.001587045 | 22.70697544 |
| TRAIL | 16 | 72079657 | T | C | -0.0724 | 0.0146 | 0.1946 | 7.09E-07 | rs77303550 | 14728 | 0.001666875 | 24.58739065 |
| TRAIL | 17 | 64224775 | T | C | 0.2575 | 0.037 | 0.029 | 3.42E-12 | rs8178824 | 14735 | 0.00327624 | 48.42750195 |
| TRAIL | 18 | 29804863 | A | T | -0.0894 | 0.0115 | 0.4593 | 7.61E-15 | rs654488 | 14735 | 0.00408462 | 60.42552126 |
| TRAIL | 19 | 44153100 | A | G | 0.3554 | 0.0163 | 0.8425 | 2.14E-105 | rs4760 | 14287 | 0.032203469 | 475.3339543 |
| TRANCE | 1 | 1973608 | A | G | 0.302 | 0.0635 | 0.9818 | 1.98E-06 | rs72636362 | 11728 | 0.001924889 | 22.61478003 |
| TRANCE | 1 | 22143382 | A | G | 0.167 | 0.0344 | 0.0349 | 1.21E-06 | rs34221978 | 14734 | 0.001596987 | 23.56443883 |
| TRANCE | 2 | 17337409 | T | G | 0.2368 | 0.0486 | 0.9817 | 1.10E-06 | rs72781813 | 14735 | 0.001608576 | 23.73733212 |
| TRANCE | 2 | 30655453 | A | C | -0.1939 | 0.0416 | 0.976 | 3.15E-06 | rs113835939 | 14732 | 0.001472541 | 21.72250939 |
| TRANCE | 2 | 104163036 | T | G | -0.1719 | 0.0366 | 0.9693 | 2.64E-06 | rs76488966 | 14720 | 0.001496344 | 22.0561939 |
| TRANCE | 2 | 136379377 | A | C | 0.1377 | 0.0285 | 0.9227 | 1.35E-06 | rs201831835 | 10894 | 0.002138263 | 23.33986943 |
| TRANCE | 3 | 83133339 | T | C | -0.2976 | 0.0641 | 0.9853 | 3.44E-06 | rs77980965 | 11337 | 0.001897696 | 21.55128512 |
| TRANCE | 3 | 172294500 | A | G | -0.4987 | 0.0343 | 0.0334 | 6.82E-48 | rs79287178 | 14719 | 0.014158566 | 211.3642247 |
| TRANCE | 3 | 194061578 | A | G | -0.0978 | 0.015 | 0.2943 | 7.03E-11 | rs11713634 | 11336 | 0.003736025 | 42.50289993 |
| TRANCE | 4 | 8958677 | A | T | -0.1043 | 0.0211 | 0.7203 | 7.69E-07 | rs181906998 | 9987 | 0.002440661 | 24.42962079 |
| TRANCE | 4 | 105828656 | A | G | -0.0777 | 0.0166 | 0.1504 | 2.86E-06 | rs4365726 | 14287 | 0.001531156 | 21.90609978 |
| TRANCE | 4 | 111911027 | T | C | -0.1376 | 0.0281 | 0.9058 | 9.74E-07 | rs150011668 | 11538 | 0.00207392 | 23.9744659 |
| TRANCE | 5 | 115874345 | A | G | 0.2386 | 0.0459 | 0.9763 | 2.01E-07 | rs150128402 | 14736 | 0.001830376 | 27.01820921 |
| TRANCE | 5 | 160174315 | T | C | -0.0549 | 0.0118 | 0.4357 | 3.28E-06 | rs1432791 | 14288 | 0.001512696 | 21.64312056 |
| TRANCE | 6 | 33048371 | C | G | 0.2646 | 0.0498 | 0.018 | 1.08E-07 | rs17221073 | 13801 | 0.002041376 | 28.22656647 |
| TRANCE | 6 | 90249507 | A | G | 0.054 | 0.0116 | 0.5245 | 3.24E-06 | rs6932751 | 14730 | 0.001469029 | 21.66768782 |
| TRANCE | 7 | 50811081 | A | G | 0.0686 | 0.013 | 0.2872 | 1.31E-07 | rs3801000 | 14288 | 0.001945112 | 27.84201936 |
| TRANCE | 7 | 142245686 | T | G | -0.0625 | 0.013 | 0.2875 | 1.53E-06 | rs17302 | 14288 | 0.001615102 | 23.1106699 |
| TRANCE | 8 | 19490180 | T | G | -0.078 | 0.017 | 0.8529 | 4.47E-06 | rs2975421 | 14288 | 0.00147123 | 21.04895632 |
| TRANCE | 8 | 23089208 | A | G | -0.1532 | 0.0148 | 0.2051 | 4.13E-25 | rs62501135 | 14288 | 0.007443512 | 107.1354761 |
| TRANCE | 8 | 83420230 | C | G | -0.1254 | 0.0272 | 0.9313 | 4.02E-06 | rs183217699 | 12852 | 0.001651083 | 21.25150422 |
| TRANCE | 8 | 106500173 | T | G | -0.0678 | 0.0143 | 0.6393 | 2.12E-06 | rs1839438 | 10894 | 0.002059229 | 22.47540749 |
| TRANCE | 8 | 120201029 | T | C | -0.1618 | 0.0118 | 0.4162 | 8.62E-43 | rs2468187 | 14735 | 0.01259901 | 187.989706 |
| TRANCE | 9 | 16905616 | A | T | 0.1215 | 0.0265 | 0.0705 | 4.54E-06 | rs5001566 | 11982 | 0.001751339 | 21.01785109 |
| TRANCE | 9 | 93147790 | T | G | 0.07 | 0.0148 | 0.8064 | 2.25E-06 | rs6479556 | 14728 | 0.001516595 | 22.36730552 |
| TRANCE | 11 | 37130843 | C | G | -0.0695 | 0.0151 | 0.3443 | 4.17E-06 | rs78045189 | 11760 | 0.001798153 | 21.18077509 |
| TRANCE | 12 | 129430611 | T | G | -0.2685 | 0.0539 | 0.9818 | 6.31E-07 | rs75991751 | 13422 | 0.001845405 | 24.81111782 |
| TRANCE | 13 | 43039673 | A | C | 0.1172 | 0.0116 | 0.4634 | 5.33E-24 | rs4512994 | 14736 | 0.006879574 | 102.0658126 |
| TRANCE | 13 | 68202750 | T | C | -0.1684 | 0.0356 | 0.0319 | 2.24E-06 | rs4334157 | 14736 | 0.001516162 | 22.37305195 |
| TRANCE | 17 | 26694861 | A | G | -0.1085 | 0.0116 | 0.4755 | 8.48E-21 | rs704 | 14736 | 0.005901917 | 87.47512074 |
| TRANCE | 19 | 35131252 | C | G | 0.1462 | 0.0315 | 0.0491 | 3.46E-06 | rs150416959 | 13224 | 0.001626312 | 21.53812782 |
| TRANCE | 20 | 39165692 | A | G | -0.1646 | 0.03 | 0.0498 | 4.10E-08 | rs117113213 | 14723 | 0.002040487 | 30.09942179 |
| TRANCE | 20 | 46454945 | T | C | 0.0636 | 0.0126 | 0.3364 | 4.47E-07 | rs6063153 | 14287 | 0.001780157 | 25.47489139 |
| TSLP | 1 | 240843947 | C | G | -0.0928 | 0.0187 | 0.8143 | 6.96E-07 | rs7550374 | 11345 | 0.00216604 | 24.62272821 |
| TSLP | 2 | 2626966 | C | G | -0.074 | 0.0153 | 0.758 | 1.32E-06 | rs12472785 | 11792 | 0.001979851 | 23.38874465 |
| TSLP | 2 | 239484610 | T | C | -0.0834 | 0.0178 | 0.4567 | 2.79E-06 | rs13414099 | 7943 | 0.002756188 | 21.94738237 |
| TSLP | 7 | 42730058 | T | G | 0.0846 | 0.0152 | 0.2624 | 2.61E-08 | rs4724126 | 11344 | 0.002723347 | 30.9725509 |
| TSLP | 7 | 148846775 | A | T | 0.0743 | 0.0158 | 0.632 | 2.57E-06 | rs75129390 | 8817 | 0.002501812 | 22.1087877 |
| TSLP | 8 | 69813968 | A | G | 0.1629 | 0.0345 | 0.9535 | 2.34E-06 | rs72652144 | 11782 | 0.001888704 | 22.29103586 |
| TSLP | 9 | 23277990 | A | T | -0.0934 | 0.0201 | 0.1258 | 3.37E-06 | rs112206094 | 11792 | 0.001827762 | 21.58877361 |
| TSLP | 10 | 34395970 | A | G | -0.1569 | 0.0338 | 0.0499 | 3.45E-06 | rs117095006 | 11345 | 0.001895762 | 21.54447514 |
| TSLP | 10 | 108726426 | T | C | -0.2956 | 0.063 | 0.0141 | 2.70E-06 | rs72811179 | 11345 | 0.001936785 | 22.01157873 |
| TSLP | 11 | 121946210 | A | G | 0.2674 | 0.0575 | 0.9812 | 3.31E-06 | rs145111430 | 11345 | 0.001902635 | 21.62273114 |
| TSLP | 15 | 60209215 | A | C | 0.3219 | 0.066 | 0.0132 | 1.08E-06 | rs190906347 | 10858 | 0.002186018 | 23.78340764 |
| TSLP | 15 | 79915029 | A | G | 0.1619 | 0.0351 | 0.0381 | 3.98E-06 | rs140886020 | 11786 | 0.001801896 | 21.27187448 |
| TSLP | 16 | 8805947 | T | G | 0.1784 | 0.0367 | 0.0353 | 1.17E-06 | rs12448125 | 11792 | 0.001999865 | 23.62565763 |
| TSLP | 17 | 27504563 | A | G | -0.4423 | 0.0943 | 0.0096 | 2.73E-06 | rs118119134 | 8576 | 0.002558663 | 21.99425217 |
| TSLP | 17 | 80919387 | A | G | -0.0643 | 0.0139 | 0.4553 | 3.73E-06 | rs7406537 | 11149 | 0.001915683 | 21.39510543 |
| TSLP | 20 | 37959633 | A | G | 0.3618 | 0.0747 | 0.9877 | 1.28E-06 | rs185922111 | 10858 | 0.002155802 | 23.45394588 |
| TSLP | 22 | 47002274 | T | C | 0.1348 | 0.0294 | 0.8892 | 4.54E-06 | rs577897343 | 7943 | 0.002639688 | 21.01724356 |
| TNF | 1 | 146403678 | A | C | 0.2346 | 0.0505 | 0.9586 | 3.39E-06 | rs587680479 | 9830 | 0.002190621 | 21.57669335 |
| TNF | 1 | 162517994 | A | T | -0.0727 | 0.0141 | 0.2484 | 2.52E-07 | rs12145644 | 14287 | 0.001857301 | 26.58090703 |
| TNF | 1 | 221052765 | A | G | -0.0591 | 0.0129 | 0.6653 | 4.62E-06 | rs2738752 | 12848 | 0.001630989 | 20.98591603 |
| TNF | 1 | 233623860 | A | G | 0.109 | 0.0228 | 0.0734 | 1.75E-06 | rs12726054 | 14721 | 0.001550145 | 22.85200416 |
| TNF | 2 | 53077754 | A | G | 0.1404 | 0.0273 | 0.9522 | 2.71E-07 | rs2163333 | 14719 | 0.001793705 | 26.44538574 |
| TNF | 2 | 99371601 | A | G | -0.0849 | 0.0168 | 0.8184 | 4.34E-07 | rs201620545 | 11327 | 0.002249592 | 25.53407485 |
| TNF | 2 | 109239869 | A | T | -0.0592 | 0.0125 | 0.3965 | 2.18E-06 | rs826688 | 12835 | 0.001744493 | 22.42620092 |
| TNF | 3 | 59625877 | A | G | -0.0622 | 0.0136 | 0.2327 | 4.80E-06 | rs3821473 | 14736 | 0.001417449 | 20.91433236 |
| TNF | 3 | 98429219 | C | G | 0.0812 | 0.012 | 0.4558 | 1.32E-11 | rs73133996 | 14288 | 0.003194395 | 45.78136851 |
| TNF | 3 | 142705695 | A | G | -0.1312 | 0.028 | 0.9544 | 2.79E-06 | rs1965399 | 14736 | 0.001487734 | 21.95293847 |
| TNF | 3 | 143021856 | C | G | 0.1192 | 0.014 | 0.748 | 1.68E-17 | rs9842051 | 14288 | 0.00504809 | 72.48291382 |
| TNF | 3 | 174384187 | T | C | -0.2108 | 0.0456 | 0.9813 | 3.79E-06 | rs78254232 | 14248 | 0.001497638 | 21.36734495 |
| TNF | 4 | 103188709 | T | C | 0.2027 | 0.0236 | 0.0696 | 8.77E-18 | rs13107325 | 14733 | 0.004982223 | 73.76061551 |
| TNF | 5 | 167311493 | T | C | 0.0577 | 0.0119 | 0.4339 | 1.24E-06 | rs11738159 | 14288 | 0.001642753 | 23.50698379 |
| TNF | 6 | 70682566 | T | C | -0.2262 | 0.0471 | 0.025 | 1.57E-06 | rs575752535 | 10894 | 0.002112698 | 23.06023075 |
| TNF | 6 | 88516736 | A | G | -0.2027 | 0.0438 | 0.9577 | 3.69E-06 | rs16879825 | 11784 | 0.00181417 | 21.41339661 |
| TNF | 8 | 145013345 | T | C | 0.0613 | 0.0122 | 0.388 | 5.05E-07 | rs11136339 | 13664 | 0.001844258 | 25.24281098 |
| TNF | 9 | 5636355 | T | C | -0.0856 | 0.0186 | 0.8764 | 4.18E-06 | rs56023600 | 14287 | 0.001480257 | 21.17682467 |
| TNF | 9 | 33113322 | T | C | -0.0897 | 0.0193 | 0.1102 | 3.36E-06 | rs7019909 | 14288 | 0.001509533 | 21.59779787 |
| TNF | 9 | 136154168 | T | C | 0.1098 | 0.0157 | 0.7888 | 2.68E-12 | rs579459 | 11785 | 0.004133111 | 48.90256807 |
| TNF | 10 | 17895807 | T | C | 0.1082 | 0.0193 | 0.2616 | 2.07E-08 | rs201375822 | 10692 | 0.002930935 | 31.42379686 |
| TNF | 10 | 51775971 | C | G | -0.401 | 0.0871 | 0.9859 | 4.15E-06 | rs111641307 | 10446 | 0.002024986 | 21.19186979 |
| TNF | 10 | 132815955 | T | C | 0.1318 | 0.0286 | 0.0482 | 4.06E-06 | rs76047473 | 14718 | 0.001440866 | 21.23438733 |
| TNF | 11 | 11644391 | A | G | 0.0692 | 0.0125 | 0.3558 | 3.09E-08 | rs10831650 | 14288 | 0.002140376 | 30.64300606 |
| TNF | 11 | 130975896 | A | G | -0.0717 | 0.0154 | 0.1931 | 3.23E-06 | rs58743186 | 12818 | 0.001688273 | 21.67350255 |
| TNF | 12 | 592399 | T | C | -0.0744 | 0.0161 | 0.1517 | 3.82E-06 | rs73590361 | 14726 | 0.001448038 | 21.35183141 |
| TNF | 12 | 82487578 | C | G | -0.1855 | 0.0377 | 0.9706 | 8.64E-07 | rs117550445 | 14721 | 0.001641928 | 24.20728705 |
| TNF | 12 | 129101566 | T | C | 0.0666 | 0.0131 | 0.3457 | 3.70E-07 | rs4882710 | 14288 | 0.001805716 | 25.84312756 |
| TNF | 14 | 55351508 | A | C | 0.1015 | 0.0218 | 0.1166 | 3.22E-06 | rs552941568 | 10894 | 0.00198595 | 21.67401447 |
| TNF | 17 | 7451110 | T | C | 0.211 | 0.0129 | 0.2563 | 3.90E-60 | rs34790908 | 14732 | 0.017836417 | 267.5016879 |
| TNF | 17 | 7789542 | A | G | -0.1386 | 0.0238 | 0.0779 | 5.76E-09 | rs7503751 | 14288 | 0.002367944 | 33.90874768 |
| TNF | 19 | 19706214 | A | C | 0.1896 | 0.0369 | 0.0315 | 2.77E-07 | rs76133364 | 13224 | 0.001992484 | 26.39722328 |
| uPA | 1 | 110470764 | A | G | -0.0785 | 0.0166 | 0.1578 | 2.26E-06 | rs333947 | 14286 | 0.001562907 | 22.35951264 |
| uPA | 1 | 152190722 | T | C | 0.2771 | 0.0607 | 0.9835 | 4.99E-06 | rs202063542 | 10407 | 0.001998487 | 20.83589688 |
| uPA | 2 | 89132295 | A | C | -0.3429 | 0.071 | 0.0258 | 1.37E-06 | rs576592832 | 8334 | 0.002790943 | 23.31922098 |
| uPA | 2 | 160726868 | A | G | -0.0852 | 0.0114 | 0.5375 | 7.80E-14 | rs7564243 | 14729 | 0.003777917 | 55.84837119 |
| uPA | 3 | 56631258 | A | G | 0.0952 | 0.0176 | 0.1456 | 6.33E-08 | rs6805474 | 14285 | 0.002043994 | 29.2541681 |
| uPA | 3 | 193665003 | T | C | -0.091 | 0.019 | 0.8498 | 1.67E-06 | rs62286554 | 11335 | 0.00201965 | 22.9350107 |
| uPA | 4 | 35016704 | A | G | -0.0548 | 0.0119 | 0.5246 | 4.12E-06 | rs1074669 | 14286 | 0.001482219 | 21.20344314 |
| uPA | 4 | 131098437 | A | G | -0.1817 | 0.0389 | 0.0248 | 3.00E-06 | rs74607099 | 14723 | 0.001479692 | 21.81482094 |
| uPA | 5 | 126921537 | T | G | 0.0627 | 0.0133 | 0.7552 | 2.43E-06 | rs59772299 | 14730 | 0.001506518 | 22.22147221 |
| uPA | 6 | 32900651 | A | G | -0.0625 | 0.012 | 0.6344 | 1.91E-07 | rs154972 | 14724 | 0.00183896 | 27.12305141 |
| uPA | 7 | 29499619 | C | G | 0.2093 | 0.0456 | 0.0329 | 4.43E-06 | rs577588918 | 10894 | 0.001930111 | 21.06342706 |
| uPA | 8 | 139662968 | C | G | 0.1968 | 0.0417 | 0.0253 | 2.37E-06 | rs72727847 | 14729 | 0.001509901 | 22.26994287 |
| uPA | 9 | 94784966 | A | G | 0.1061 | 0.0217 | 0.1034 | 1.01E-06 | rs10992204 | 14286 | 0.001670608 | 23.90289457 |
| uPA | 9 | 136141504 | A | G | 0.1 | 0.017 | 0.1744 | 4.04E-09 | rs13299342 | 11781 | 0.002928507 | 34.59620191 |
| uPA | 10 | 75424174 | A | G | 0.3099 | 0.0664 | 0.0145 | 3.05E-06 | rs3933086 | 11778 | 0.001846006 | 21.7787646 |
| uPA | 10 | 75677840 | A | C | -0.0946 | 0.0115 | 0.5624 | 1.93E-16 | rs2227575 | 14729 | 0.004573226 | 67.65931814 |
| uPA | 11 | 11142087 | A | G | 0.0784 | 0.0154 | 0.1671 | 3.56E-07 | rs10840566 | 14733 | 0.001756047 | 25.9138371 |
| uPA | 11 | 126243952 | A | G | -0.1024 | 0.0161 | 0.1509 | 2.01E-10 | rs11220462 | 14731 | 0.002738577 | 40.44726812 |
| uPA | 12 | 105734364 | C | G | 0.3395 | 0.0656 | 0.0119 | 2.28E-07 | rs144470316 | 12303 | 0.002172283 | 26.77942656 |
| uPA | 12 | 111973358 | A | G | 0.0662 | 0.0134 | 0.478 | 7.80E-07 | rs597808 | 11334 | 0.002148765 | 24.40224256 |
| uPA | 17 | 7063667 | T | C | -0.1107 | 0.0156 | 0.7855 | 1.28E-12 | rs7406661 | 14286 | 0.003512427 | 50.34834979 |
| uPA | 17 | 26694861 | A | G | 0.0567 | 0.0115 | 0.4758 | 8.20E-07 | rs704 | 14734 | 0.001647153 | 24.30588741 |
| uPA | 18 | 24686365 | T | C | -0.094 | 0.0125 | 0.3008 | 5.48E-14 | rs4800787 | 14730 | 0.003824448 | 56.54272174 |
| uPA | 19 | 44153100 | A | G | 0.1408 | 0.0165 | 0.8426 | 1.42E-17 | rs4760 | 14286 | 0.005071293 | 72.80758349 |
| uPA | 19 | 44174441 | T | C | -0.422 | 0.0311 | 0.0405 | 6.10E-42 | rs4251805 | 14734 | 0.012342126 | 184.096346 |
| VEGF_A | 1 | 32204683 | A | G | -0.0734 | 0.0152 | 0.8126 | 1.37E-06 | rs2050256 | 14739 | 0.001579612 | 23.31556847 |
| VEGF_A | 1 | 190376438 | T | C | -0.0759 | 0.0148 | 0.8114 | 2.92E-07 | rs61818787 | 14732 | 0.001782066 | 26.2966943 |
| VEGF_A | 4 | 31819358 | A | G | -0.07 | 0.0152 | 0.6438 | 4.12E-06 | rs183596950 | 11538 | 0.001834767 | 21.20477248 |
| VEGF_A | 4 | 94769686 | A | G | -0.0685 | 0.0145 | 0.2065 | 2.31E-06 | rs7688836 | 14742 | 0.001511582 | 22.31445145 |
| VEGF_A | 5 | 54043585 | T | C | -0.22 | 0.0457 | 0.9797 | 1.48E-06 | rs16883415 | 14744 | 0.001569335 | 23.17149453 |
| VEGF_A | 5 | 88180196 | T | C | -0.1625 | 0.0267 | 0.9462 | 1.16E-09 | rs114694170 | 14728 | 0.002508705 | 37.03609834 |
| VEGF_A | 5 | 117371187 | T | C | -0.1842 | 0.0374 | 0.028 | 8.43E-07 | rs11953790 | 14730 | 0.001644064 | 24.25364832 |
| VEGF_A | 6 | 43918407 | T | C | -0.3686 | 0.012 | 0.4233 | 1.00E-200 | rs9369434 | 14295 | 0.061916381 | 943.381605 |
| VEGF_A | 6 | 44043492 | A | C | 0.1055 | 0.0188 | 0.1166 | 2.00E-08 | rs9349270 | 14296 | 0.002197956 | 31.48679517 |
| VEGF_A | 7 | 68565319 | A | C | -0.0628 | 0.0137 | 0.6119 | 4.56E-06 | rs7808444 | 14296 | 0.001467661 | 21.00958101 |
| VEGF_A | 7 | 144108520 | T | C | -0.079 | 0.0166 | 0.8309 | 1.95E-06 | rs1208181 | 12855 | 0.001758739 | 22.64490135 |
| VEGF_A | 8 | 5413008 | C | G | -0.0741 | 0.0158 | 0.8345 | 2.73E-06 | rs4875579 | 14296 | 0.001536173 | 21.9918356 |
| VEGF_A | 8 | 73592332 | C | G | -0.2163 | 0.0449 | 0.9739 | 1.45E-06 | rs117976551 | 13809 | 0.001677756 | 23.20371123 |
| VEGF_A | 8 | 106581528 | A | T | 0.1231 | 0.0134 | 0.7319 | 4.06E-20 | rs6993770 | 14296 | 0.005868617 | 84.38120974 |
| VEGF_A | 9 | 2687795 | A | T | 0.1344 | 0.0125 | 0.542 | 5.80E-27 | rs6475938 | 12412 | 0.009228061 | 115.586876 |
| VEGF_A | 9 | 3020960 | T | C | -0.2475 | 0.0539 | 0.0153 | 4.39E-06 | rs145703410 | 14296 | 0.001472714 | 21.08201483 |
| VEGF_A | 10 | 65071215 | A | C | 0.0838 | 0.0117 | 0.4155 | 7.93E-13 | rs10822155 | 14744 | 0.003467309 | 51.29291707 |
| VEGF_A | 10 | 104076091 | A | G | -0.3266 | 0.0715 | 0.0091 | 4.93E-06 | rs12784822 | 14296 | 0.001457378 | 20.8621717 |
| VEGF_A | 11 | 2028103 | C | G | -0.0683 | 0.0142 | 0.7087 | 1.51E-06 | rs10840177 | 13231 | 0.001745474 | 23.13124804 |
| VEGF_A | 11 | 95274487 | T | G | 0.0992 | 0.0208 | 0.9024 | 1.85E-06 | rs34536806 | 14296 | 0.001588516 | 22.74238004 |
| VEGF_A | 12 | 46909886 | C | G | -0.1288 | 0.0265 | 0.9341 | 1.17E-06 | rs6582666 | 11791 | 0.001999494 | 23.61926107 |
| VEGF_A | 12 | 75261276 | T | C | 0.2736 | 0.0582 | 0.0162 | 2.59E-06 | rs145846107 | 13422 | 0.001643821 | 22.09639873 |
| VEGF_A | 13 | 29335624 | C | G | 0.1981 | 0.0397 | 0.0248 | 6.04E-07 | rs138648222 | 14739 | 0.001686502 | 24.89596715 |
| VEGF_A | 13 | 77462624 | A | C | -0.2779 | 0.0603 | 0.9871 | 4.05E-06 | rs144037665 | 11969 | 0.001771392 | 21.23586195 |
| VEGF_A | 16 | 231541 | T | C | 0.1174 | 0.0253 | 0.069 | 3.48E-06 | rs1203834 | 13232 | 0.001624664 | 21.52927987 |
| VEGF_A | 19 | 14759939 | T | C | -0.0671 | 0.0127 | 0.296 | 1.27E-07 | rs62640435 | 14292 | 0.001949383 | 27.91109145 |

**Supplementary Table 3.** STROBE-MR checklist

STROBE-MR checklist of recommended items to address in reports of Mendelian randomization studies1 2

| **Item No.** | **Section** | **Checklist item** | **Note/ Page No.** |
| --- | --- | --- | --- |
| 1 | **TITLE and ABSTRACT** | Indicate Mendelian randomization (MR) as the study’s design in the title and/or the abstract if that is a main purpose of the study | ‘Mendelian randomization’ in title and abstract |
|  | **INTRODUCTION** |  |  |
| 2 | **Background** | Explain the scientific background and rationale for the reported study. What is the exposure? Is a potential causal relationship between exposure and outcome plausible? Justify why MR is a helpful method to address the study question | Page 1-2 |
| 3 | **Objectives** | State specific objectives clearly, including pre-specified causal hypotheses (if any). State that MR is a method that, under specific assumptions, intends to estimate causal effects | Page 1 |
|  | **METHODS** |  |  |
| 4 | **Study design and data sources** | Present key elements of the study design early in the article. Consider including a table listing sources of data for all phases of the study. For each data source contributing to the analysis, describe the following: | Page 2-3, Supplementary Table, Fig 1 |
|  | a) | Setting: Describe the study design and the underlying population, if possible. Describe the setting, locations, and relevant dates, including periods of recruitment, exposure, follow-up, and data collection, when available. |
|  | b) | Participants: Give the eligibility criteria, and the sources and methods of selection of participants. Report the sample size, and whether any power or sample size calculations were carried out prior to the main analysis |
|  | c) | Describe measurement, quality control and selection of genetic variants |
|  | d) | For each exposure, outcome, and other relevant variables, describe methods of assessment and diagnostic criteria for diseases |
|  | e) | Provide details of ethics committee approval and participant informed consent, if relevant |
| 5 | **Assumptions** | Explicitly state the three core IV assumptions for the main analysis (relevance, independence and exclusion restriction) as well assumptions for any additional or sensitivity analysis | Page 2, Fig 1 |
| 6 | **Statistical methods: main analysis** | Describe statistical methods and statistics used | Page 2-4, Supplementary Table |
|  | a) | Describe how quantitative variables were handled in the analyses (i.e., scale, units, model) |
|  | b) | Describe how genetic variants were handled in the analyses and, if applicable, how their weights were selected |
|  | c) | Describe the MR estimator (e.g. two-stage least squares, Wald ratio) and related statistics. Detail the included covariates and, in case of two-sample MR, whether the same covariate set was used for adjustment in the two samples |
|  | d) | Explain how missing data were addressed |
|  | e) | If applicable, indicate how multiple testing was addressed |
| 7 | **Assessment of assumptions** | Describe any methods or prior knowledge used to assess the assumptions or justify their validity | Page 3-4 |
| 8 | **Sensitivity analyses and additional analyses** | Describe any sensitivity analyses or additional analyses performed (e.g. comparison of effect estimates from different approaches, independent replication, bias analytic techniques, validation of instruments, simulations) | Page 3-4 |
| 9 | **Software and pre-registration** |  |  |
|  | a) | Name statistical software and package(s), including version and settings used | Page 3-4 |
|  | b) | State whether the study protocol and details were pre-registered (as well as when and where) |
|  | **RESULTS** |  |  |
| 10 | **Descriptive data** |  |  |
|  | a) | Report the numbers of individuals at each stage of included studies and reasons for exclusion. Consider use of a flow diagram |  |
|  | b) | Report summary statistics for phenotypic exposure(s), outcome(s), and other relevant variables (e.g. means, SDs, proportions) | Page 4-16  There is no sample overlap between the exposure and outcome studies. |
|  | c) | If the data sources include meta-analyses of previous studies, provide the assessments of heterogeneity across these studies |
|  | d) | For two-sample MR:  i.  Provide justification of the similarity of the genetic variant-exposure associations between the exposure and outcome samples  ii.  Provide information on the number of individuals who overlap between the exposure and outcome studies |
| 11 | **Main results** |  |  |
|  | a) | Report the associations between genetic variant and exposure, and between genetic variant and outcome, preferably on an interpretable scale | Page 4-16, Table 2-13, Supplementary Figure |
|  | b) | Report MR estimates of the relationship between exposure and outcome, and the measures of uncertainty from the MR analysis, on an interpretable scale, such as odds ratio or relative risk per SD difference |
|  | c) | If relevant, consider translating estimates of relative risk into absolute risk for a meaningful time period |
|  | d) | Consider plots to visualize results (e.g. forest plot, scatterplot of associations between genetic variants and outcome versus between genetic variants and exposure) |
| 12 | **Assessment of assumptions** |  | Page 4-16，Table 2-13 |
|  | a) | Report the assessment of the validity of the assumptions |
|  | b) | Report any additional statistics (e.g., assessments of heterogeneity across genetic variants, such as *I2*, Q statistic or E-value) |
| 13 | **Sensitivity analyses and additional analyses** |  | Page 4-16，Table 2-13, |
|  | a) | Report any sensitivity analyses to assess the robustness of the main results to violations of the assumptions |
|  | b) | Report results from other sensitivity analyses or additional analyses |
|  | c) | Report any assessment of direction of causal relationship (e.g., bidirectional MR) |
|  | d) | When relevant, report and compare with estimates from non-MR analyses |
|  | e) | Consider additional plots to visualize results (e.g., leave-one-out analyses) |
|  | **DISCUSSION** |  |  |
| 14 | **Key results** | Summarize key results with reference to study objectives | Page 14 |
| 15 | **Limitations** | Discuss limitations of the study, taking into account the validity of the IV assumptions, other sources of potential bias, and imprecision. Discuss both direction and magnitude of any potential bias and any efforts to address them | Page 16 |
| 16 | **Interpretation** |  |  |
|  | a) | Meaning: Give a cautious overall interpretation of results in the context of their limitations and in comparison with other studies | Page 14-17 |
|  | b) | Mechanism: Discuss underlying biological mechanisms that could drive a potential causal relationship between the investigated exposure and the outcome, and whether the gene-environment equivalence assumption is reasonable. Use causal language carefully, clarifying that IV estimates may provide causal effects only under certain assumptions |
|  | c) | Clinical relevance: Discuss whether the results have clinical or public policy relevance, and to what extent they inform effect sizes of possible interventions |
| 17 | **Generalizability** | Discuss the generalizability of the study results (a) to other populations, (b) across other exposure periods/timings, and (c) across other levels of exposure | Page 17 |
|  | **OTHER INFORMATION** |  |  |
| 18 | **Funding** | Describe sources of funding and the role of funders in the present study and, if applicable, sources of funding for the databases and original study or studies on which the present study is based | Page 17 |
| 19 | **Data and data sharing** | Provide the data used to perform all analyses or report where and how the data can be accessed, and reference these sources in the article. Provide the statistical code needed to reproduce the results in the article, or report whether the code is publicly accessible and if so, where | Page 17 |
| 20 | **Conflicts of Interest** | All authors should declare all potential conflicts of interest | Page 17 |

This checklist is copyrighted by the Equator Network under the Creative Commons Attribution 3.0 Unported (CC BY 3.0) license.

1. Skrivankova VW, Richmond RC, Woolf BAR, Yarmolinsky J, Davies NM, Swanson SA, et al. Strengthening the Reporting of Observational Studies in Epidemiology using Mendelian Randomization (STROBE-MR) Statement. JAMA. 2021;under review.

2. Skrivankova VW, Richmond RC, Woolf BAR, Davies NM, Swanson SA, VanderWeele TJ, et al. Strengthening the Reporting of Observational Studies in Epidemiology using Mendelian Randomisation (STROBE-MR): Explanation and Elaboration. BMJ. 2021;375:n2233.

| CD40 | **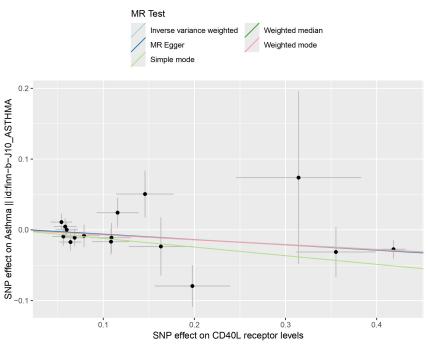** | **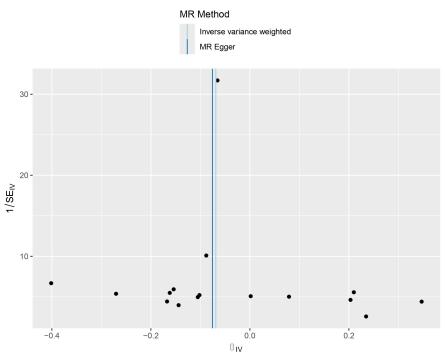** | **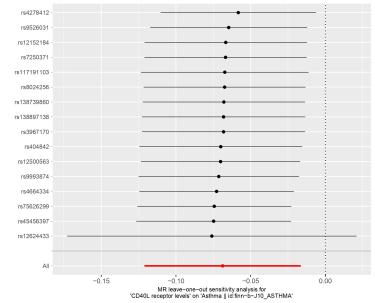** |
| --- | --- | --- | --- |
|  | （A） | （B） | （C） |
| IL-8 | 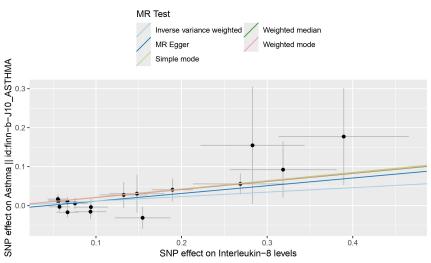 | 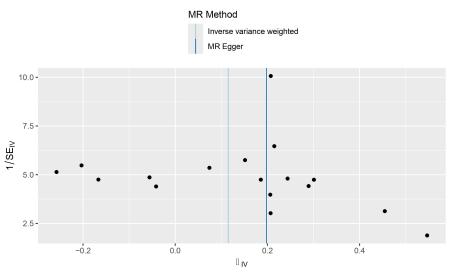 | 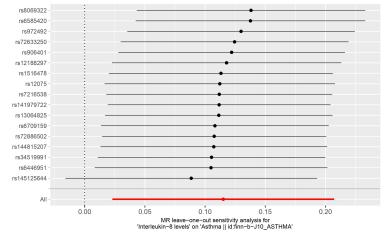 |
|  | （A） | （B） | （C） |
| CD6 | 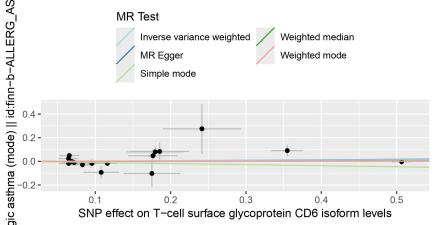 | 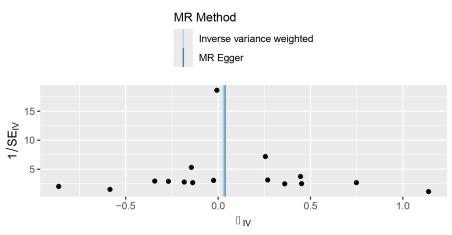 | 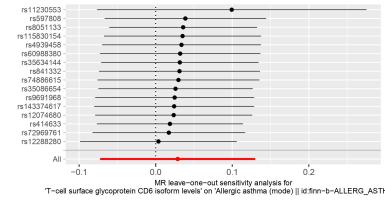 |
|  | （A） | （B） | （C） |
| TNFRSF9 | 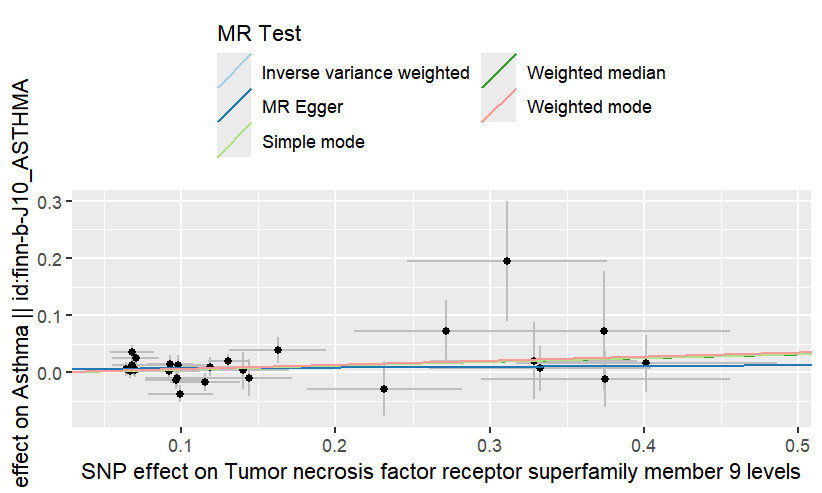 | 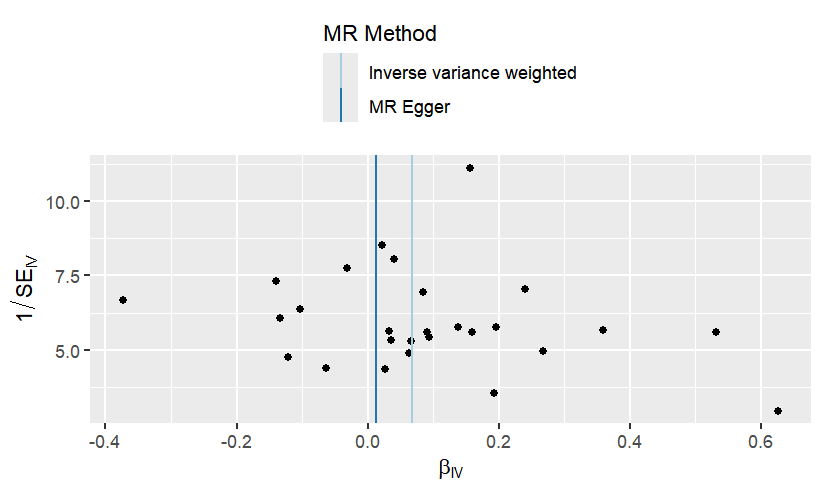 | 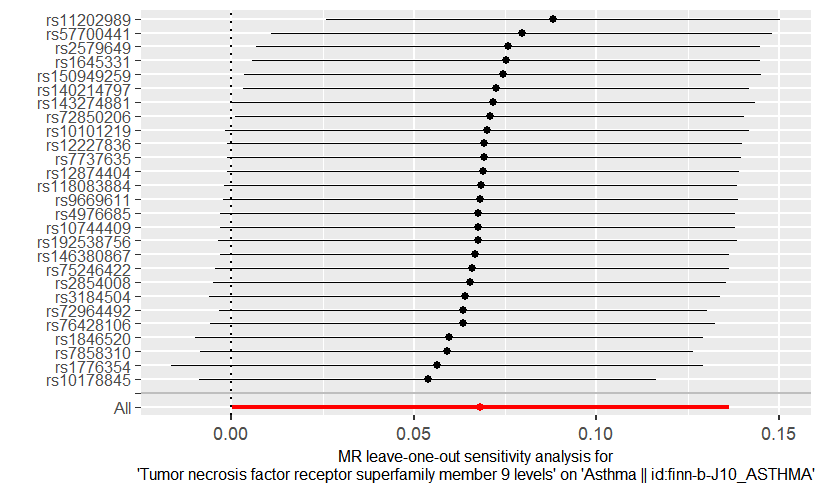 |
|  | （A） | （B） | （C） |

**Supplementary Figure S1.** Potential causal association between inflammatory proteins and asthma.

1. Scatter plot (B) Funnel plot (C) Leave-one-out plots

**Abbreviations:** CD40: CD40 measurement; IL-8: interleukin-8 measurement; CD6: level of T-cell differentiation antigen CD6 in blood plasma; TNFRSF9: tumor necrosis factor receptor superfamily member 9 measurement.

| IL-2 | 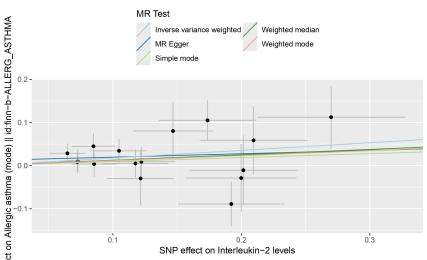 | 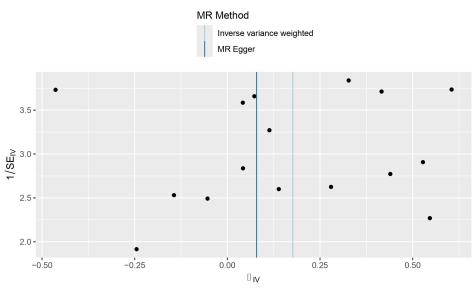 | 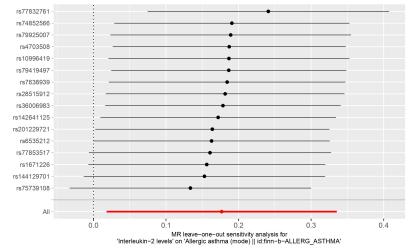 |
| --- | --- | --- | --- |
|  | （A） | （B） | （C） |
| SCF | 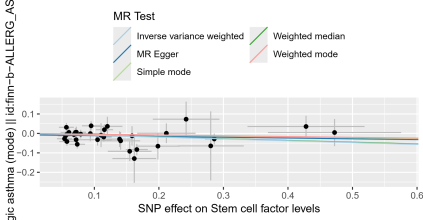 | 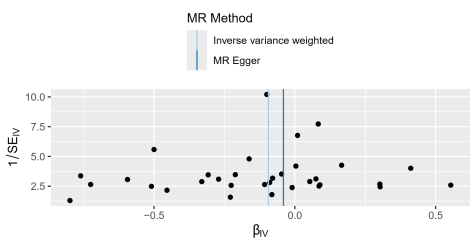 | 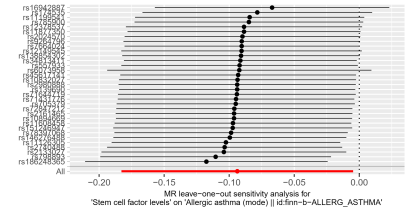 |
|  | （A） | （B） | （C） |
| TWEAK | 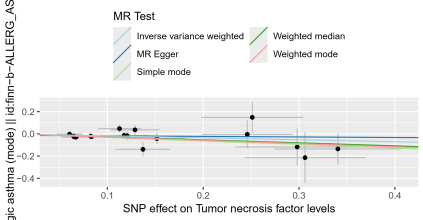 | 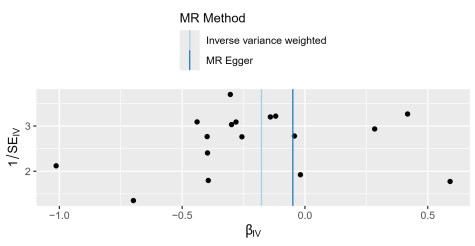 | 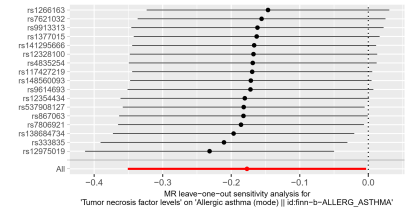 |
|  | （A） | （B） | （C） |
| TRAIL | 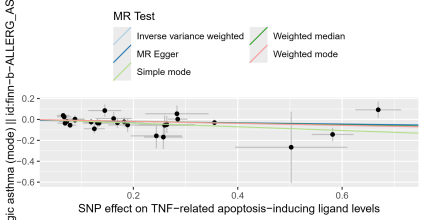 | 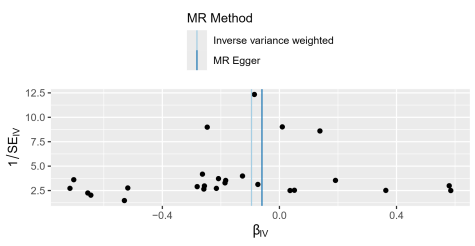 | 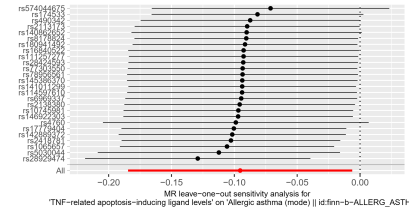 |
|  | （A） | （B） | （C） |

**Supplementary Figure S2.** Potential causal association between inflammatory proteins and allergic asthma.

(A) Scatter plot (B) Funnel plot (C) Leave-one-out plots

**Abbreviations:** IL-2: interleukin-2 measurement; SCF: stem Cell Factor measurement; TWEAK: tumor necrosis factor measurement; TRAIL: TNF-related apoptosis-inducing ligand measurement.

| CCL19 | 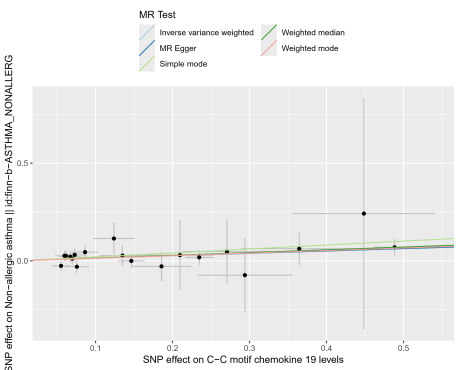 | 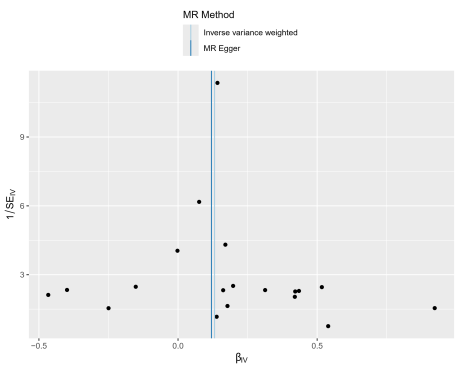 | 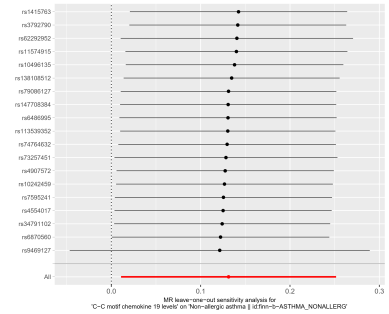 |
| --- | --- | --- | --- |
|  | （A） | （B） | （C） |
| CST5 | 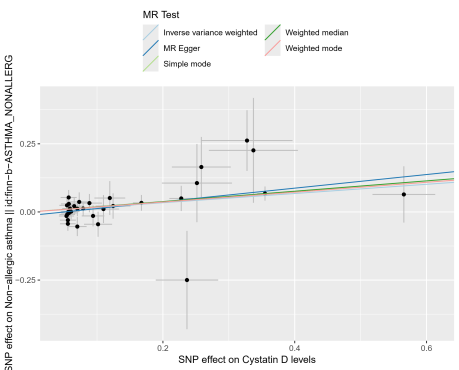 | 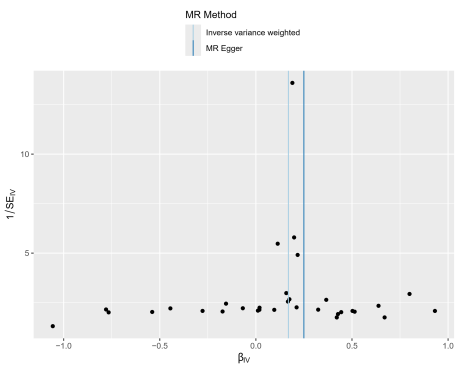 | 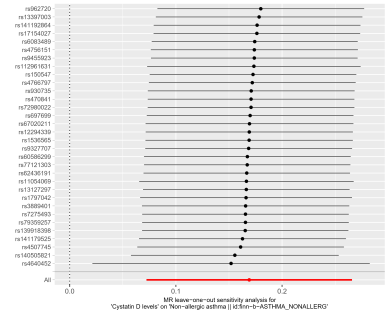 |
|  | （A） | （B） | （C） |
| CX3CL1 | 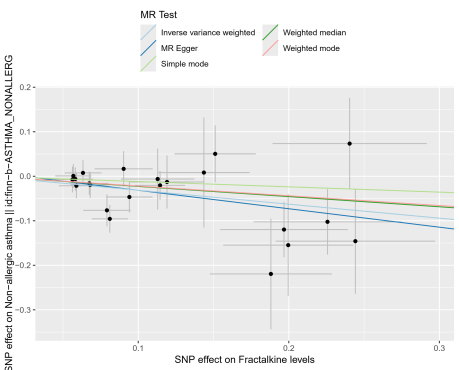 | 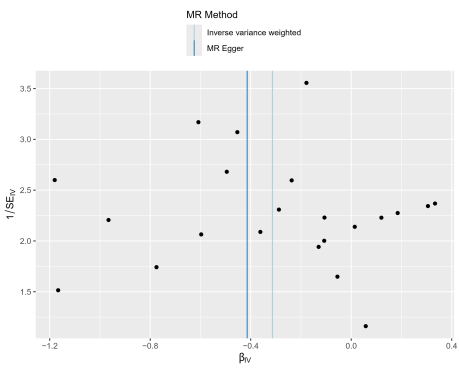 | 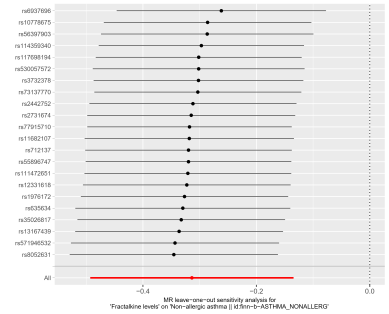 |
|  | （A） | （B） | （C） |
| IL-7 | 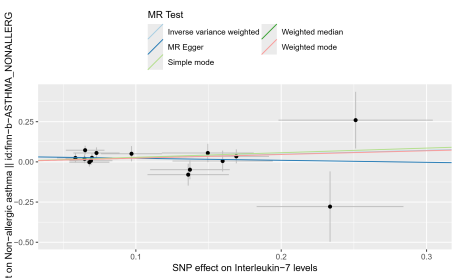 | 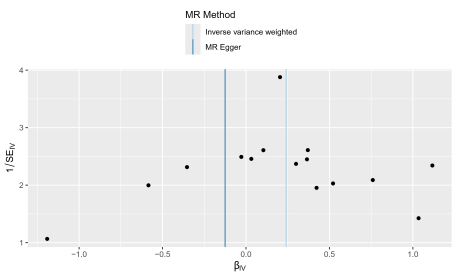 | 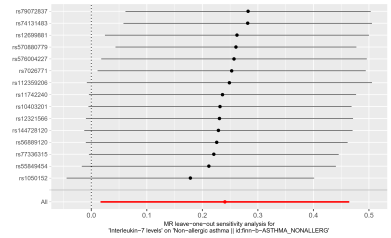 |
|  | （A） | （B） | （C） |
| LAP TGF-beta-1 | 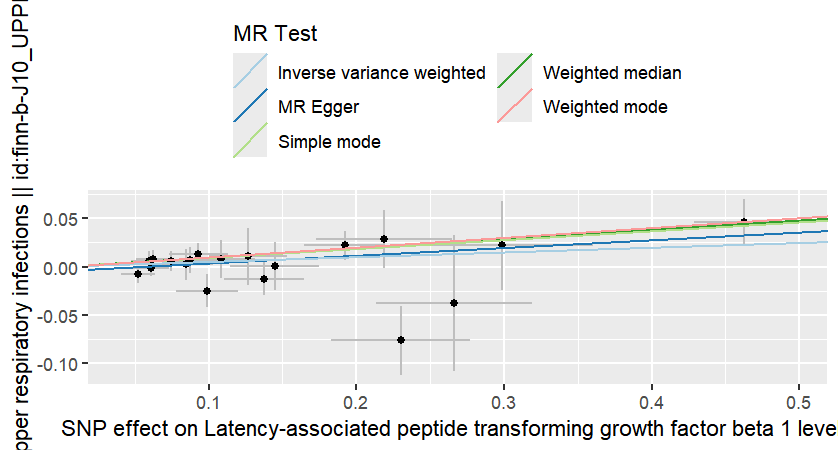 | 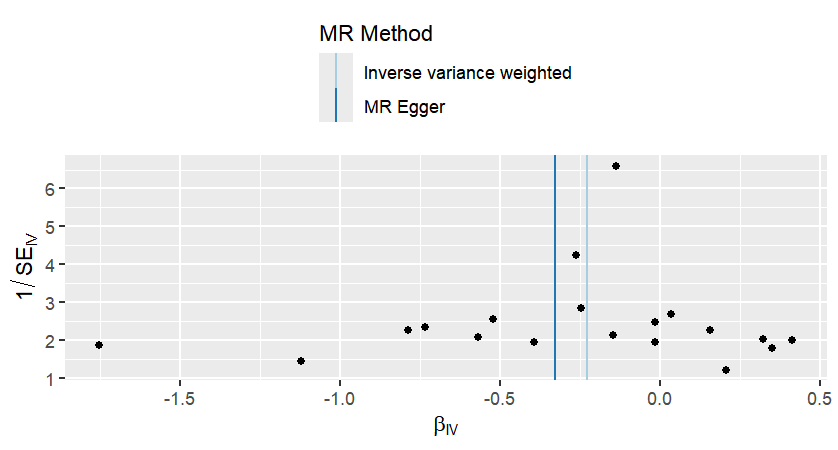 | 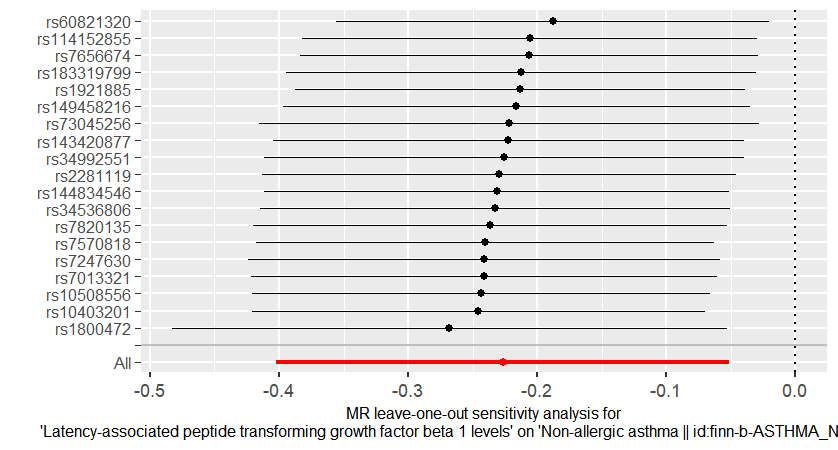 |
|  | （A） | （B） | （C） |
| ST1A1 | 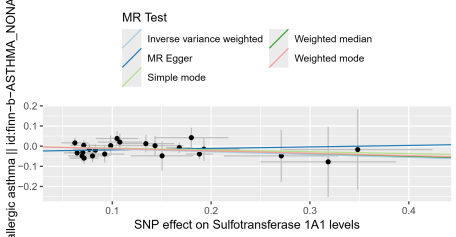 | 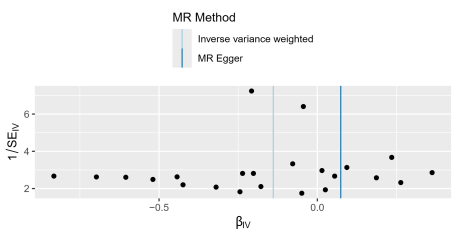 | 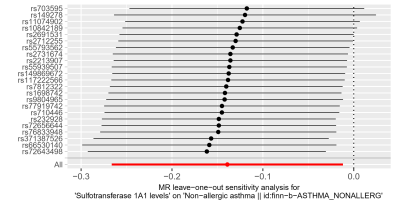 |
|  | （A） | （B） | （C） |

**Supplementary Figure S3.** Potential causal association between inflammatory proteins and non-allergic asthma

(A) Scatter plot (B) Funnel plot (C) Leave-one-out plots

**Abbreviations:** CCL19: C-C motif chemokine 19 measurement; CST5: cystatin-D measurement; CX3CL1: fractalkine measurement; IL-7: interleukin-7 measurement; LAP TGF-beta-1: transforming growth factor beta-1 measurement; ST1A1: sulfotrasferase 1A1 measurement.

| ARTN | 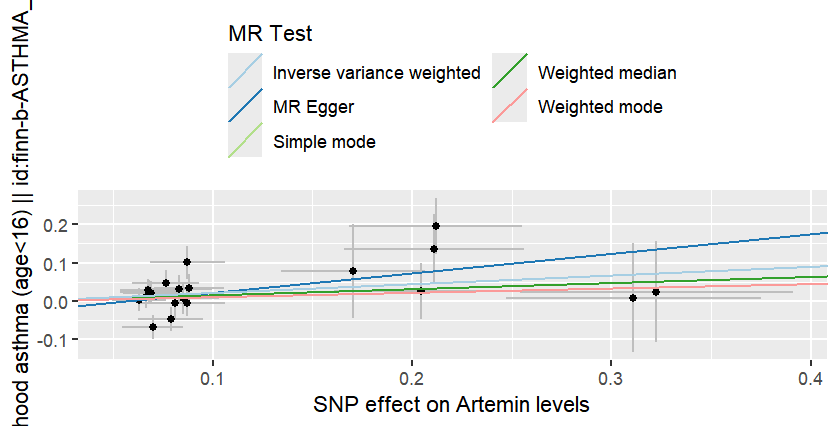 | 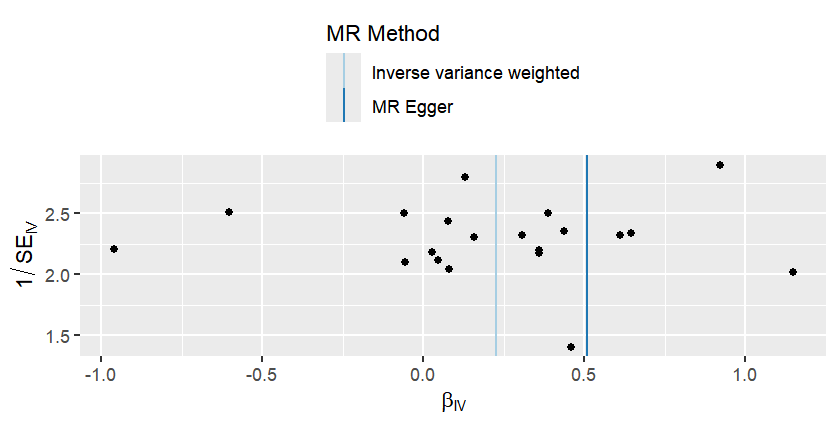 | 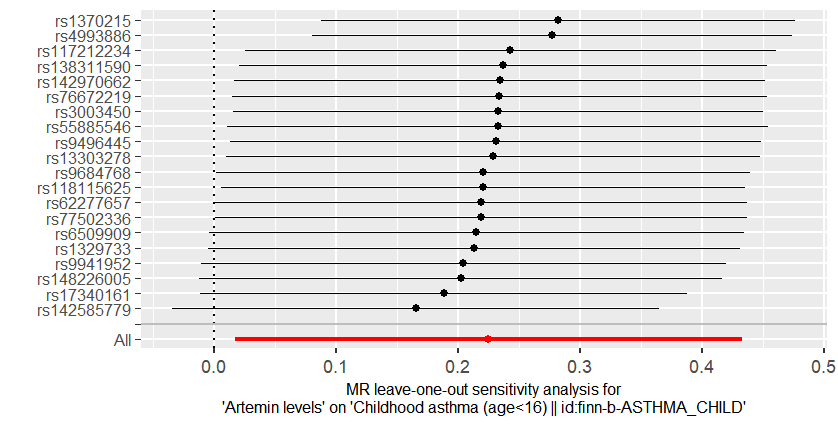 |
| --- | --- | --- | --- |
|  | （A） | （B） | （C） |
| CCL25 | 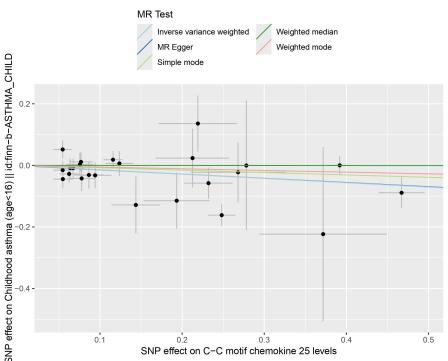 | 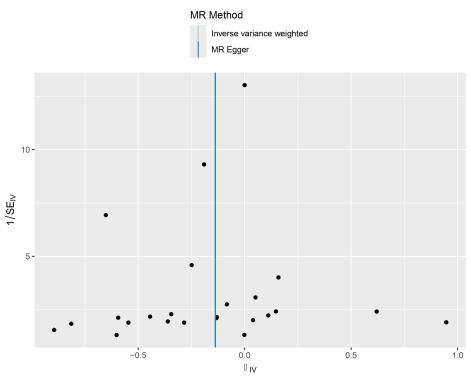 | 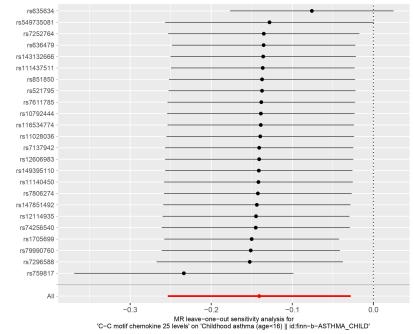 |
|  | （A） | （B） | （C） |
| IL-18R1 | 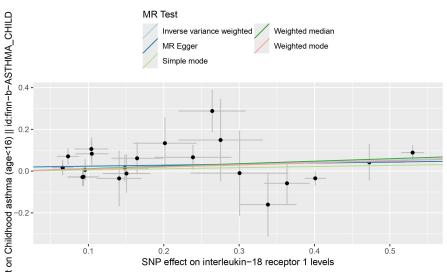 | 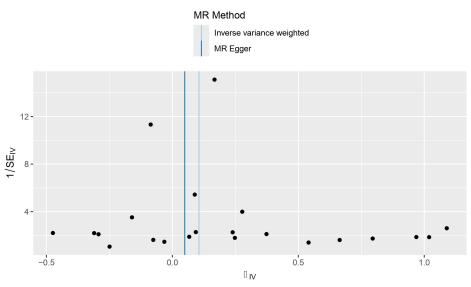 | 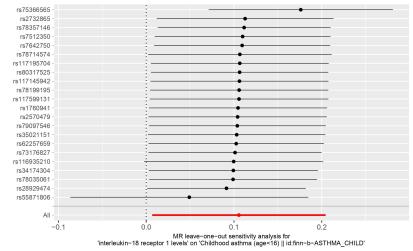 |
|  | （A） | （B） | （C） |
| LIF-R | 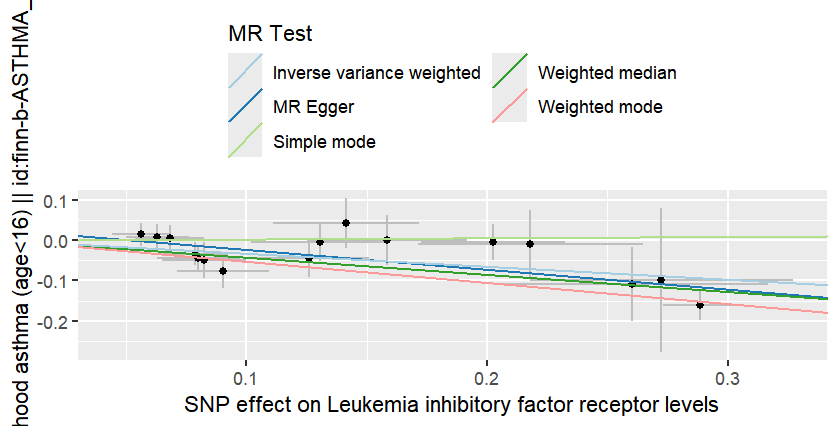 | 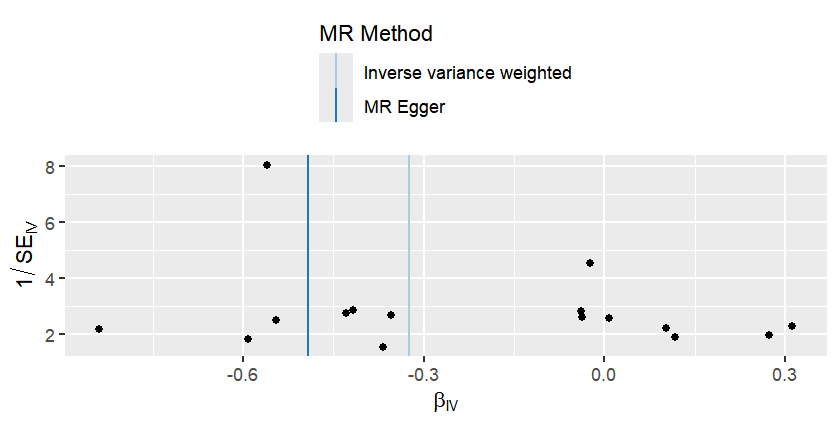 | 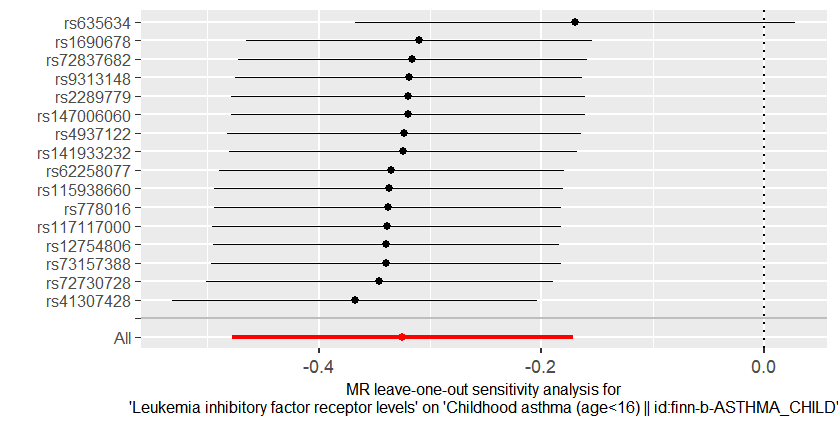 |
|  | （A） | （B） | （C） |
| TNF | 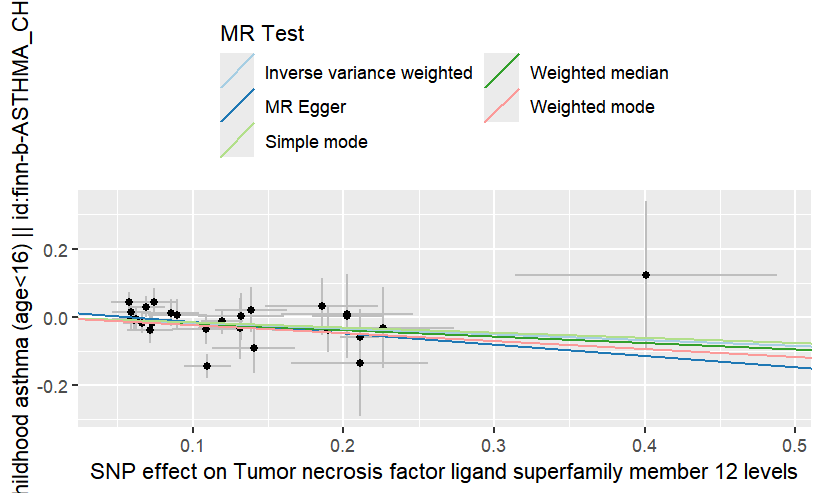 | 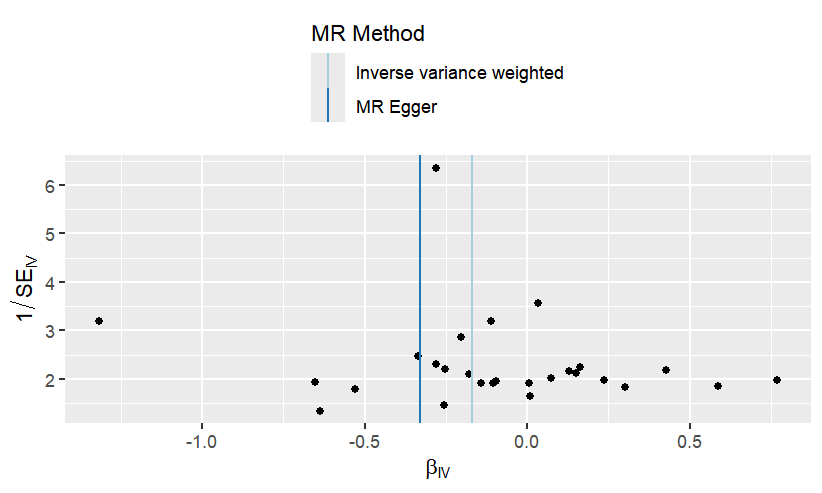 | 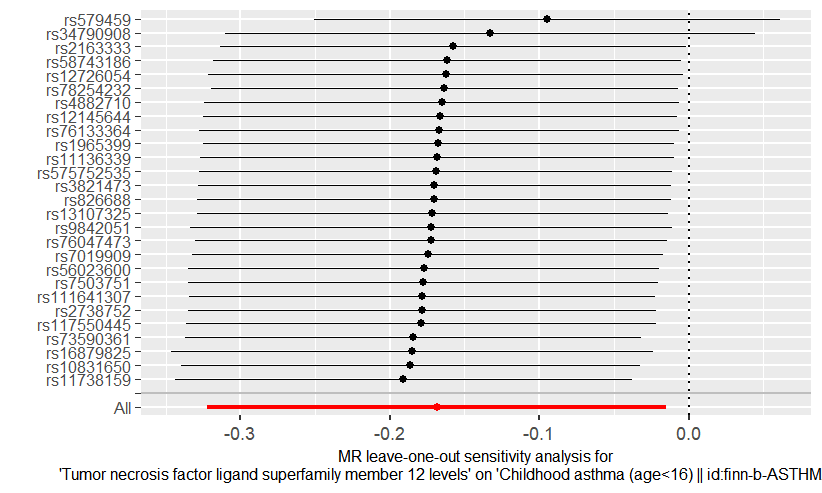 |
|  | （A） | （B） | （C） |

**Supplementary Figure S4**. Potential causal association between inflammatory proteins and asthma in children (<16 years)

(A) Scatter plot (B) Funnel plot (C) Leave-one-out plots

**Abbreviations:** ARTN: artemin measurement; CCL25: C-C motif chemokine 25 measurement; IL-18R1: interleukin-18 receptor 1 measurement; LIF-R: leukemia inhibitory factor receptor measurement; TNF: tumor necrosis factor ligand superfamily member 12 measurement.

| CXCL6 | 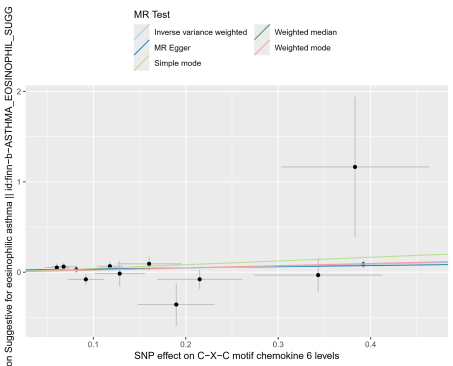 | 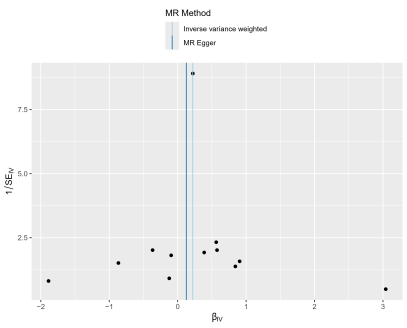 | 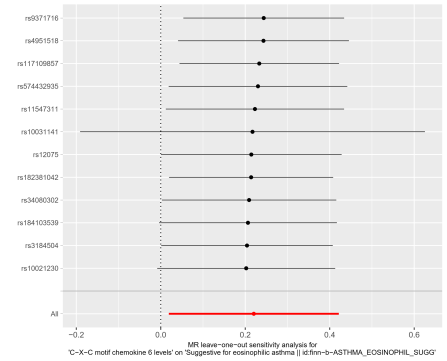 |
| --- | --- | --- | --- |
|  | （A） | （B） | （C） |
| CST5 | 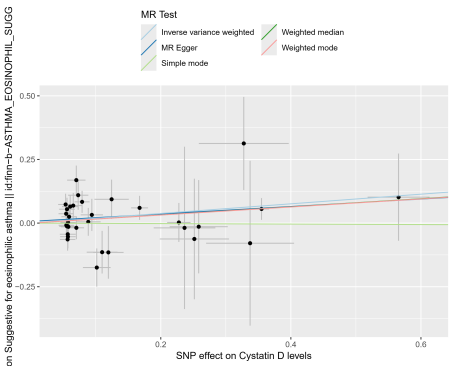 | 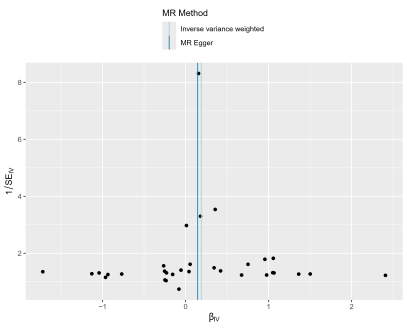 | 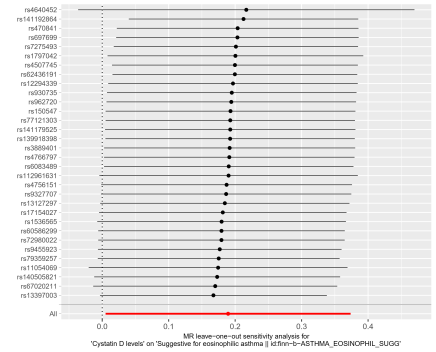 |
|  | （A） | （B） | （C） |
| SLAMF1 | 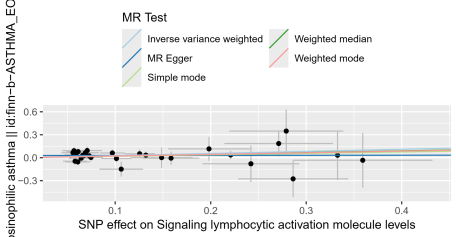 | 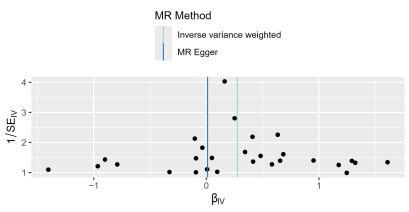 | 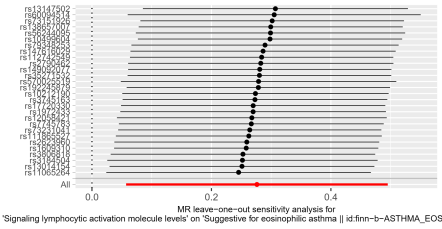 |
|  | （A） | （B） | （C） |
| TNFB | 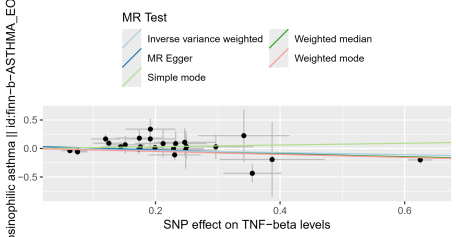 | 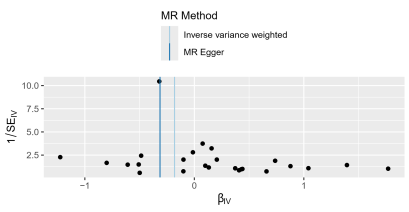 | 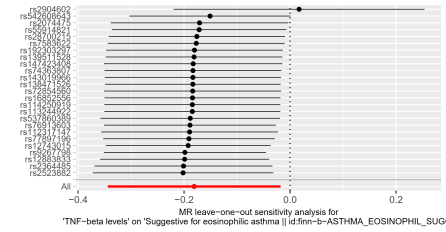 |
|  | （A） | （B） | （C） |

**Supplementary Figure S5.** Potential causal association between inflammatory proteins and suggestive for eosinophilic asthma

(A) Scatter plot (B) Funnel plot (C) Leave-one-out plots

**Abbreviations:** CXCL6: C-X-C motif chemokine 6 measurement; CST5: cystatin-D measurement; SLAMF1: signaling lymphocytic activation molecule measurement; TNFB: lymphotoxin-alpha measurement.

| FGF-5 | 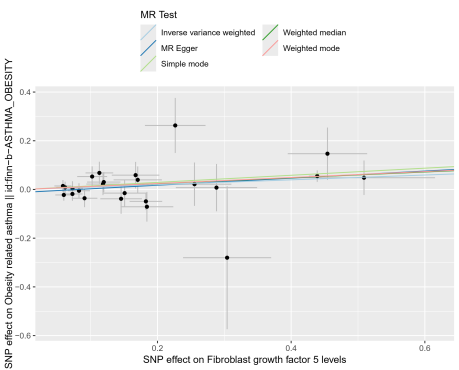 | 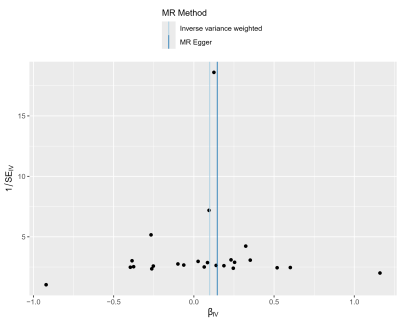 | 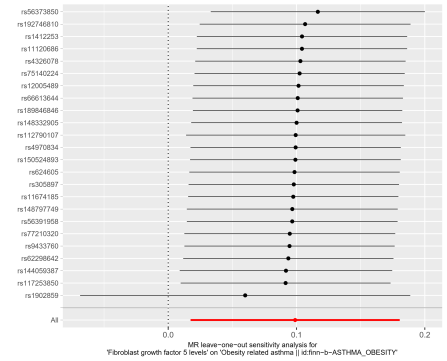 |
| --- | --- | --- | --- |
|  | （A） | （B） | （C） |
| IL-17A | 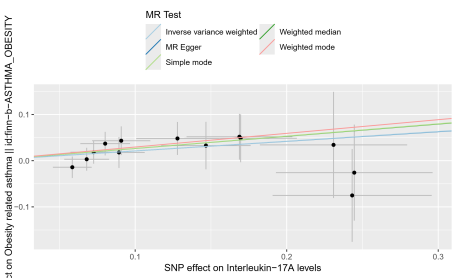 | 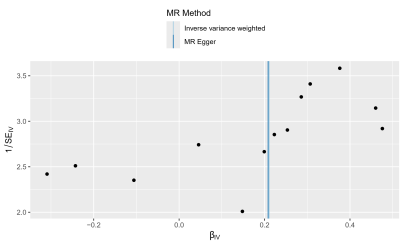 | 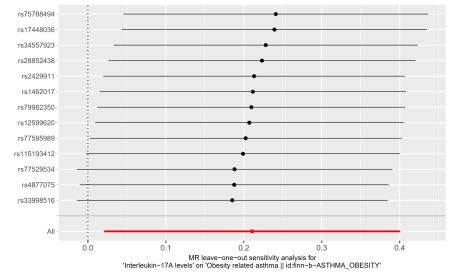 |
|  | （A） | （B） | （C） |
| PD-L1 | 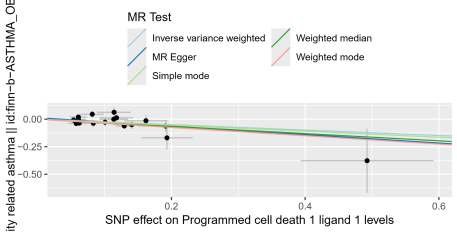 | 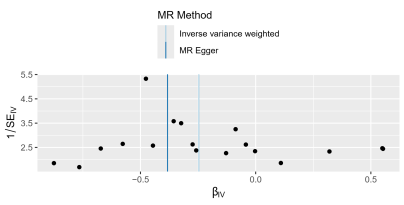 | 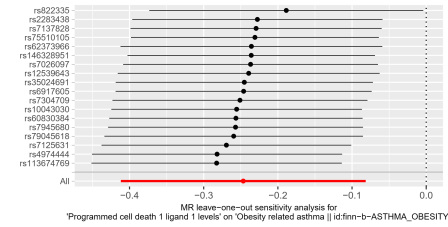 |
|  | （A） | （B） | （C） |

**Supplementary Figure S6.** Potential causal association between inflammatory proteins and Obesity related asthma

(A) Scatter plot (B) Funnel plot (C) Leave-one-out plots

**Abbreviations:** FGF-5: fibroblast growth factor 5 measurement; IL-17A: interleukin-17A measurement; PD-L1: programmed cell death 1 ligand 1 measurement.
